# Supplementary material for: Knowledge of and attitudes toward clinical trials in Saudi Arabia: a cross-sectional study
Source: PubMed Central journal article supplement — BMJ Open. 2019 Oct 22;9(10):e031305. doi: 10.1136/bmjopen-2019-031305 (PMC6830621; doi:10.1136/bmjopen-2019-031305), 2019-10-22
Supplement: bmjopen-2019-031305.draft_revisions.pdf [file bmjopen-2019-031305.draft_revisions.pdf]

# BMJ Open

BMJ Open is committed to open peer review. As part of this commitment we make the peer review history of every article we publish publicly available.

When an article is published we post the peer reviewers' comments and the authors' responses online. We also post the versions of the paper that were used during peer review. These are the versions that the peer review comments apply to.

The versions of the paper that follow are the versions that were submitted during the peer review process. They are not the versions of record or the final published versions. They should not be cited or distributed as the published version of this manuscript.

BMJ Open is an open access journal and the full, final, typeset and author-corrected version of record of the manuscript is available on our site with no access controls, subscription charges or pay-per-view fees (<http://bmjopen.bmj.com>).

If you have any questions on BMJ Open's open peer review process please email [info.bmjopen@bmj.com](mailto:info.bmjopen@bmj.com)

# BMJ Open

## Knowledge and Attitudes toward Clinical Trials in Saudi Arabia: Cross-sectional study.

|                               |                                                                                                                                                  |
|-------------------------------|--------------------------------------------------------------------------------------------------------------------------------------------------|
| Journal:                      | <i>BMJ Open</i>                                                                                                                                  |
| Manuscript ID                 | bmjopen-2019-031305                                                                                                                              |
| Article Type:                 | Original research                                                                                                                                |
| Date Submitted by the Author: | 27-Apr-2019                                                                                                                                      |
| Complete List of Authors:     | Al Rawashdeh, Nedal<br>Damsees, Rana<br>Al-Jeraisy, Majed<br>Al Qasim, Eman<br>Deeb, Ahmad; King Abdullah International Medical Research Center, |
| Keywords:                     | Knowledge, Attitudes, Clinical trials < THERAPEUTICS                                                                                             |
|                               |                                                                                                                                                  |

SCHOLARONE™  
Manuscripts

# Knowledge and Attitudes toward Clinical Trials in Saudi Arabia: Cross-sectional study

Nedal Al Rawashdeh<sup>1,2</sup>, Rana Damsees<sup>1,2</sup>, Majed Al Jeraisy<sup>1</sup>, Eman Al Qasim<sup>1</sup> and Ahmad M. Deeb<sup>1\*</sup>

1. Research office, King Abdullah International Medical Research Center, Riyadh, Saudi Arabia; King Saud bin Abdulaziz University for Health Sciences, Riyadh Saudi Arabia; Ministry of National Guard Health Affairs, Riyadh, Saudi Arabia.
2. The Office of Scientific Affairs and Research, King Hussein Cancer Center, Amman, Jordan

Nedal Al Rawashdeh: [rawashdehne@gmail.com](mailto:rawashdehne@gmail.com)

Rana Damsees: [rdamsees@gmail.com](mailto:rdamsees@gmail.com)

Majed Al Jeraisy: [JeraisyM@NGHA.MED.SA](mailto:JeraisyM@NGHA.MED.SA)

Eman Al Qasim: [alqasimem@NGHA.MED.SA](mailto:alqasimem@NGHA.MED.SA)

Ahmad M. Deeb: [rn\\_a\\_deeb@hotmail.com](mailto:rn_a_deeb@hotmail.com)

## \* Corresponding Author

**Ahmad M. Deeb, RN, MSN, CCRC®**

Senior Clinical Research Coordinator

Research Office

King Abdullah International Medical Research Center

King Saud Bin Abdulaziz University for Health Sciences

King Abdulaziz Medical City

Ministry of National Guard - Health Affairs

PO Box 22490, Mail Code 1515

Riyadh 11426, Kingdom of Saudi Arabia

Tel. No: +966118011111 ext. 18950

Monile: +966547883491

[rn\\_a\\_deeb@hotmail.com](mailto:rn_a_deeb@hotmail.com)

**Short title:** Knowledge & Attitude toward Clinical Trials

## Declarations

### Ethics approval and consent to participate

This study was approved by the Institutional Review Board (IRB) at King Abdul-Aziz Medical City – Riyadh, KSA.

### Consent for publication

Not applicable

### Availability of data and material

The datasets used and/or analysed during the current study are available from the corresponding author on reasonable request.

### Competing interests

The authors declare that they have no competing interests.

### Funding

This study was supported by research grant RC16/010/R by King Abdullah International Medical Research Center. The study sponsor doesn't have any role in the study design, management, analysis, interpretation of the data, or in writing the manuscript.

### Author contributions statement

Ahmad Deeb and Nedal Al Rawashdeh: Conception and design, data acquisition, data collection, analytical plan, drafting of the manuscript. Rana Damsees: Conception and

1  
2 design and data acquisition. Majed Al Jeraisy: Conception and design, data acquisition  
3  
4 and supervision. Eman Al Qasim: Conception and design and data collection. All  
5  
6 authors critically revised the manuscript for important intellectual content, and approved  
7  
8 of the final version to be published and agreed to be accountable for all aspects of the  
9  
10 work.  
11  
12

## 13 14 **Acknowledgements**

15  
16 Not applicable  
17  
18  
19  
20  
21  
22  
23  
24  
25  
26  
27  
28  
29  
30  
31  
32  
33  
34  
35  
36  
37  
38  
39  
40  
41  
42  
43  
44  
45  
46  
47  
48  
49  
50  
51  
52  
53  
54  
55  
56  
57  
58  
59  
60

## Abstract

**Objectives:** Clinical trials (CTs) considered one of the important methods for devolving new treatments and provide access to new potential effective drugs that are still under investigation. Measuring public knowledge and attitudes toward CTs is important to assess the public readiness and acceptance for testing drugs on human subjects, which wasn't assessed before in the Kingdom Saudi Arabia (KSA). The objective of this study is to assess the status of Saudi public knowledge and attitudes toward CTs and toward participation to test new or approved drugs.

**Design:** Cross-sectional.

**Setting:** AlJenadriyah cultural/heritage festival in Riyadh/KSA.

**Participants:** A structured questionnaire was developed and distributed during the 2016 AlJenadriyah cultural/heritage festival. A convenience sampling approach was used. Participating booths/exhibition halls and visitors in the festival were approached to participate in the study. The responses were converted to percentage mean scores out of 100 for each knowledge and attitudes.

**Primary and secondary outcome Measures:** knowledge and attitudes toward CTs

**Results:** Total participants were of 938. The total knowledge score was 56.8 (24.8) and 61.5 (28.0) for attitudes. Although most of participants supported testing approved/off-label and new drugs on adult and pediatric patients, only (30.5%) agreed that new drugs can be tested on healthy volunteers. Study results showed that gender, educational-level, income, medical background, age-group and health insurance were independent

1  
2 predictors for Knowledge of CTs. While gender, educational-level and medical  
3  
4 background were independent predictor for attitudes toward CTs.  
5  
6

7  
8 **Conclusion:** The Saudi public has low level of knowledge and moderate level of attitudes  
9  
10 toward CTs and there is a moderate positive correlation between these two factors. Our  
11  
12 results suggest conduction and investment of CTs in KSA; however, public educational  
13  
14 campaigns about CTs are needed in specific the importance of testing new drugs on  
15  
16 healthy volunteers.  
17  
18

### 19 20 21 22 **Strength and limitation of the study** 23 24

- 25  
26 • Studies that have measured knowledge and attitudes of the Saudi public in general  
27  
28 toward CTs are lacking.  
29
- 30  
31 • This is the first study to solicit public opinions on the way different phases of CTs  
32  
33 are conducted in adult and pediatric populations.  
34
- 35  
36 • The main limitation is related to the possible selection bias as a result of  
37  
38 convenience sampling.  
39  
40  
41  
42  
43  
44  
45  
46  
47  
48  
49  
50  
51  
52  
53  
54  
55  
56  
57  
58  
59  
60

## Introduction

The clinical trial (CT) is a superior research tool for advancing medical knowledge and practice, and CT results are considered to provide the highest levels of evidence for medical practice and decision-making.<sup>1</sup> Subject recruitment is at the core of a successful CT. The acquisition of an adequate number of study subjects is crucial in being able to achieve the study objectives of testing the hypothesis and answering the research questions, and failure to recruit an adequate number of participants can result in wasted time, money, and effort.<sup>2</sup> Additionally, it can lead to a delay in the acceptance of the trial results and, thus, in the completion of the drug development process.

Knowledge and attitudes toward CTs are considered to be major challenges for subject recruitment.<sup>3-6</sup> Several studies have revealed that knowledge of CTs and attitudes toward participation are interrelated.<sup>7-11</sup> as increased knowledge likely promotes positive attitudes toward CT participation. Accordingly, low recruitment rates for CTs may be improved by increasing the public's knowledge about CTs<sup>6,9,11</sup> and by emphasizing the social responsibility perspective of how participation can contribute to the improvement of CTs.<sup>12,13</sup> Thus, improving the knowledge level of the public toward CTs represents an initial important step in being able to improve CT recruitment efforts in the future.<sup>9,12,14</sup>

In the Kingdom of Saudi Arabia (KSA), the clinical research domain has developed during the last few decades.<sup>15</sup> KSA researchers have contributed to the medical literature by conducting different types of research, including investigator-initiated CTs and international multicenter-sponsored CTs.<sup>15</sup> Measuring the knowledge and attitudes of the



1  
2 Saudi public toward CTs will be crucial to assess their readiness and acceptance of CTs  
3  
4  
5  
6  
7  
8  
9  
10  
11  
12  
13  
14  
15  
16  
17  
18  
19  
20  
21  
22  
23  
24  
25  
26  
27  
28  
29  
30  
31  
32  
33  
34  
35  
36  
37  
38  
39  
40  
41  
42  
43  
44  
45  
46  
47  
48  
49  
50  
51  
52  
53  
54  
55  
56  
57  
58  
59  
60

Saudi public toward CTs will be crucial to assess their readiness and acceptance of CTs  
conduction in Saudi Arabi; and then to improve the CT recruitment and decision-making  
processes. Additionally, it will provide reliable information to researchers and healthcare  
leaders for proper strategic planning of public engagement in CT awareness campaigns.  
In return, these efforts may provide public benefits by increasing knowledge and  
awareness of CTs, enriching medical knowledge through updates of CT results, and the  
sharing of public preferences for future CTs.

Several studies have reported patient (or family) knowledge and attitude toward  
CTs at health care settings in Saudi Arabia <sup>16-20</sup>; however, studies that have measured  
knowledge and attitudes of the Saudi public in general toward CTs are lacking.

The purpose of this study was to assess the status of Saudi public knowledge and  
attitudes toward CTs in general and more specific the attitudes toward participation in  
CTs to test drugs.

The study addressed the following questions: What does the Saudi public know  
about CTs? What is the attitude of individuals in Saudi Arabia toward CTs and toward  
participation in CTs? Is there a correlation between the level of public knowledge and the  
attitudes of individuals in Saudi Arabia toward CTs? What factors can be predictive of the  
levels of public knowledge and the attitudes toward CTs in the Saudi population?

## Materials and Methods

### Setting

This cross-sectional study was conducted between February 2 and February 19,  
2016 at the Al Jenadriyah Cultural and Heritage Festival, which takes place in Riyadh city

1  
2 and hosts millions of residents and visitors from different regions of the country. We  
3  
4 selected this event since it provided us with a unique chance to interview a representative  
5  
6 cross-section from all regions of the KSA. This study was approved by the Institutional  
7  
8 Review Board (IRB) at King Abdul-Aziz Medical City – Riyadh, KSA.  
9  
10

## 11 12 **Study subjects**

13  
14  
15 This study included adults of both genders who were willing to participate. A  
16  
17 convenience sampling approach was used. Participating booths/exhibition halls in the  
18  
19 festival were approached and festival visitors were invited to participate in the study. All  
20  
21 of the participants provided a one-page informed consent by checking the YES box in  
22  
23 order to accept filling the questionnaire which was administered by three investigators.  
24  
25 Participants didn't receive any compensation for agreeing to fill out the questionnaire.  
26  
27  
28  
29

## 30 31 **Patient and public involvement**

32  
33 Public were not included in the development of the research questions or design  
34  
35 of the study. However, the questionnaire was piloted on public before use.  
36  
37  
38

## 39 40 **Sample size**

41  
42 The population of the KSA is approximately 31,742,308 (as per the Central  
43  
44 Department of Statistics and Information), including 11,677,338 expatriates (Non-  
45  
46 Saudi).<sup>21</sup> On the basis of this population estimate, a 0.05 margin of error, a 95%  
47  
48 confidence level, and a response rate of 50%, we calculated that a minimum sample size  
49  
50 of 385 subjects was needed; however, we increased the sample size to 1,000 to ensure  
51  
52 that all regions of the KSA will be adequately represented in the sample.  
53  
54  
55  
56  
57  
58  
59  
60

## Data collection

A structured questionnaire was developed in Arabic for this study. It was composed of questions that were divided into three sections: demographics, knowledge and attitude.

Data for the following variables were collected in the demographics section: gender, age, educational level, monthly income, nationality, residential area, employment status, marital status, health insurance, chronic diseases, medical background (working in a healthcare facility or having health-related education), and previous participation in medical research.

The knowledge section was composed of 12 questions, and participant answers were scored as correct (score = 1) or incorrect/not sure (score = 0). The total knowledge score was converted to the percentage mean score with a possible maximum value of 100, where a score of 100 indicates the perfect knowledge of CTs.

The attitude section was composed of nine direct questions, and participant answers were scored as positive (score = 1) or negative/not sure (score = 0). The total attitude score was converted to the percentage mean score with a possible maximum value of 100, where a score of 100 indicates the best positive attitudes toward CTs.

Based on previous studies, overall knowledge and attitude was classified into three levels following blooms cut-off point criteria as following: Above 80% (High level), 60-79% (Moderate level), less than 59% (Low level).<sup>22-24</sup>

We made an effort to present the questions in a language that was simple enough to enable the participants to understand and answer the questions, even if they were not

1  
2 aware of CTs. The questionnaire was validated using content validity where each  
3 question is given to a panel of expert analysts, and they rate it and give their opinion  
4 about whether the question is essential, useful or irrelevant for measuring the knowledge  
5 and attitudes. It was piloted on a group of 28 participants, and complex scientific terms  
6 were simplified. Reliability was tested using Cronbach's alpha for the pilot sample for both  
7 knowledge and attitude sections (21 items) and it was 0.81. During the analysis, we  
8 verified the reliability using the Cronbach's alpha for questions in the knowledge section  
9 (12 items) was 0.771 and for those in the attitude section (9 items) was 0.782.  
10  
11  
12  
13  
14  
15  
16  
17  
18  
19  
20  
21

## 22 **Data analysis**

23  
24 Data for categorical variables were represented as frequencies and percentages.  
25 Data for continuous variables were represented as mean  $\pm$  standard deviation (s.d.).  
26 Normality was tested by the skewness coefficient, which indicated that knowledge and  
27 attitude data were normally distributed. The Student's *t*-test and one-way analysis of  
28 variance (ANOVA) were used as tests of significance. The Pearson correlation coefficient  
29 was used to determine the correlation between knowledge and attitude scores. A  
30 generalized linear model was used to determine the independent predictors of knowledge  
31 and attitudes toward CTs. All calculations were performed using the Statistical Package  
32 for the Social Sciences (version 23; SPSS Inc., Chicago, IL, USA).  
33  
34  
35  
36  
37  
38  
39  
40  
41  
42  
43  
44  
45

## 46 **Results**

### 47 **Subject characteristics**

48  
49 A total of 1,084 subjects were approached for participation in this study. In total,  
50 938 (86.5%) agreed to complete the study questionnaire with one missing value in gender  
51  
52  
53  
54  
55  
56  
57  
58  
59  
60

1  
2 and Nationality variables. Of the 938 participants, male individuals were predominant  
3  
4 (61.6%). The age groups with the greatest representation among the participants were  
5  
6 18–30 (54.2%) and 31–40 (27.6%) of participants. In all, (60.1%) of participants reported  
7  
8 holding a University, college degree or more , whereas (75.7%) reported monthly incomes  
9  
10 of less than 10,000 SAR (Saudi Arabian Riyal) which is equivalent to around 2,700 USD  
11  
12 (United States Dollar). Approximately half of the participants were single (48.7%), and  
13  
14 (22.2%) of participants had chronic diseases. Participants with medical background  
15  
16 (working in a healthcare facility or having health-related education) were (27.7%). In all,  
17  
18 (15.9%) of participants declared that they had participated in medical research, and  
19  
20 (26.5%) of participants knew someone who had participated in medical research (**Table**  
21  
22  
23  
24  
25  
26  
27  
28  
29  
30  
31  
32  
33  
34  
35  
36  
37  
38  
39  
40  
41  
42  
43  
44  
45  
46  
47  
48  
49  
50  
51  
52  
53  
54  
55  
56  
57  
58  
59  
60  
1).

## Knowledge about clinical trials in Saudi Arabia

32 The overall percentage mean score (SD) for knowledge regarding CTs was 56.8  
33 (24.8) out of 100 score. Although study subjects were not aware of the term 'clinical trial',  
34 (43.7%) of could define the concept correctly. Most of the participants (71.8%) agreed  
35  
36 that CTs are subject to ethical guidelines, but only (26.8%) were aware of the concept of  
37  
38 an institutional review board (**table 2**). In all, (81.1%) of participants were aware of the  
39  
40 Saudi Food and Drug Authority (SFDA), and (66.4%) were aware of their role in the  
41  
42 regulation of CTs. Most of the participants (72.1%) agreed that CTs benefit the  
43  
44 community, and (46.5%) correctly answered the question regarding the benefits of CTs  
45  
46 for their study subjects. Subjects' answers for questions regarding the time that  
47  
48 investigators can start CTs and the rights of CT participants to withdraw from studies were  
49  
50  
51  
52  
53  
54  
55  
56  
57  
58  
59  
60

1  
2 correct on average, with (56.0%) and (47.6%) of correct responses, respectively. Other  
3 findings from the knowledge portion of the questionnaire are listed in **table 2**.  
4  
5  
6  
7

## 8 **Attitudes toward clinical trials in Saudi Arabia**

9  
10 The overall percentage mean score  $\pm$ SD for Saudi attitudes toward CTs was 61.5  
11 (28.0) out of 100 score. Most of the participants (59.5%) had positive attitudes toward  
12 testing new drugs on adult patients in Saudi Arabia, and (63.2%) showed positive  
13 attitudes toward testing approved/off-label drugs (approved and marketed drug for other  
14 indication) on patients. However, only (30.5%) of participants have positive attitudes  
15 regarding the conduct of CTs on healthy volunteers (phase I). The attitudes were similar  
16 regarding pediatric CTs, as (48.2%) and (56.4%) agreed with testing new drugs or  
17 approved/off-label drugs on pediatric patients, respectively. Majority of the participants  
18 (72.7%) expressed agreement that CTs were important for drug development, and  
19 (69.1%) affirmed the possibility of participation in CTs if the opportunity were offered to  
20 them or to a close family member. Most of the subjects (86.8%) showed a willingness to  
21 learn more about CTs. Other findings from the attitude portion of the questionnaire are  
22 listed in **table 3**.  
23  
24  
25  
26  
27  
28  
29  
30  
31  
32  
33  
34  
35  
36  
37  
38  
39  
40  
41  
42  
43

## 44 **Factors associated with increased knowledge and better**

## 45 **attitudes toward clinical trials**

46  
47 The univariate analysis revealed that females had a higher level of knowledge  
48 about CTs than males, and subjects 31–40 years old had a higher level of knowledge  
49 than those in the other age categories (**Table 1**). Clinical trials knowledge increased with  
50  
51  
52  
53  
54  
55  
56  
57  
58  
59  
60

1  
2 an increased level of education ( $P= 0.001$ ) and with increased monthly income ( $P=$   
3  $0.001$ ). Subjects from the central region of KSA showed a higher level of CT knowledge  
4  $0.001$ ). Subjects from the central region of KSA showed a higher level of CT knowledge  
5 than subjects from other regions ( $P= 0.001$ ) (**Table 1**). Undergraduate students and  
6 governmental employees showed a higher level of knowledge than subjects from other  
7 employment categories ( $P= 0.001$ ) (**Table 1**). Having governmental or private health  
8 insurance ( $P= 0.001$ ) was associated with a higher level of CT knowledge. Subjects with  
9 no chronic diseases had a higher level of knowledge than those with chronic diseases  
10 ( $P= 0.017$ ). Previous participation in medical research or the knowledge of someone who  
11 participated in medical research was associated with better CT knowledge ( $P= 0.001$ )  
12 (table 1).  
13  
14  
15  
16  
17  
18  
19  
20  
21  
22  
23  
24

25 After adjusting for the possible confounders, males beta coefficients ( $B= -14.1$ ;  $P=$   
26  $0.001$ ), non-educated participants ( $B= -19.6$ ;  $P= 0.001$ ), subjects with no income ( $B= -$   
27  $9.7$ ;  $P= 0.011$ ), and subjects with no medical background ( $B= -4.7$ ;  $P = 0.015$ ) had  
28 significantly worse knowledge scores regarding CTs. By contrast, people with age group  
29 between 41 to 60 ( $B = 12.1$ ;  $P = 0.036$ ) and those with health insurance ( $B= 12.9$ ;  $P=$   
30  $0.003$ ) seemed to have more knowledge of CTs (**Table 4**).  
31  
32  
33  
34  
35  
36  
37  
38  
39  
40

41 Females had more positive attitudes toward CTs ( $P= 0.001$ ) than males. The 31–  
42 40 and 41–60 age groups had more positive attitudes than the other age categories ( $P=$   
43  $0.007$ ), and higher education was associated with better attitudes ( $P= 0.001$ ) (**Table 1**).  
44 As with the knowledge portion of the study, both undergraduate students and  
45 governmental employees showed more positive attitudes toward CTs ( $P= 0.028$ ) than  
46 people in other employment categories (**Table 1**). Having governmental health insurance  
47 or private health insurance ( $P= 0.001$ ) was associated with more positive attitudes as  
48  
49  
50  
51  
52  
53  
54  
55  
56  
57  
58  
59  
60

1  
2 well. Subjects with medical backgrounds or who had previously participated in medical  
3  
4 research tended to have more positive attitudes ( $P= 0.001$ ) than Subjects with no medical  
5  
6 backgrounds or never participated in medical research before (**Table 1**).  
7  
8

9 After adjusting for the possible confounders, being male ( $B= -9.2$ ;  $P= 0.001$ ) or  
10  
11 uneducated ( $B= -18.4$ ,  $P= 0.004$ ), or not having a medical background ( $B= -5.0$ ;  $P=$   
12  
13  $0.039$ ), were all associated with more negative attitudes toward CTs (**Table 4**).  
14  
15

## 16 17 18 **Correlation between Saudi public knowledge and attitudes** 19 20 21 **toward clinical trials** 22 23

24 Our results showed a moderately positive relationship between Saudi public  
25  
26 knowledge and attitudes toward CTs (Pearson's  $r= 0.564$ ,  $P= 0.0001$ ). Therefore, we  
27  
28 predict that as knowledge of CTs increases, the Saudi public will show more positive  
29  
30 attitudes toward them.  
31  
32

## 33 34 **Discussion** 35 36

37 This public survey revealed an overall relative lack of knowledge regarding CTs.  
38  
39 Most of the participants could not identify or correctly define the term 'clinical trials'.  
40  
41 Although most of the Saudi public is aware of their right to voluntarily participate in CTs,  
42  
43 they were not aware of the rights of subjects to withdraw from CTs. The lack of  
44  
45 knowledge about CTs has been observed in studies that were conducted in healthcare  
46  
47 settings (with patients and/or their families) within Saudi Arabia.<sup>17-20</sup> The reason  
48  
49 underlying this lack of knowledge can be interpreted by the lack of institutional and  
50  
51 national campaigns that promote CTs.<sup>5,25</sup>  
52  
53  
54  
55  
56  
57  
58  
59  
60



1  
2  
3  
4  
5  
6  
7  
8  
9  
10  
11  
12  
13  
14  
15  
16  
17  
18  
19  
20  
21  
22  
23  
24  
25  
26  
27  
28  
29  
30  
31  
32  
33  
34  
35  
36  
37  
38  
39  
40  
41  
42  
43  
44  
45  
46  
47  
48  
49  
50  
51  
52  
53  
54  
55  
56  
57  
58  
59  
60

Although most of the participants believed that CTs are controlled by ethical principles, they were not aware of an IRB and its role in protecting human subjects. In the healthcare setting, Sheblaq et al. reported that the majority of patients with cancer were not aware of the role of the IRB.<sup>17</sup> The public tends to trust the authorities with the belief that the authorities protect the public even when there is a lack of knowledge about who is responsible for playing this role. We observed this phenomenon clearly when subjects answered positively to questions regarding their trust in the study team and in their compliance with regulatory guidelines when initiating a trial or recruiting subjects. The Saudi public successfully recognized the SFDA and its role in CTs, most likely because of their well-known food and drug related regulatory activities in Saudi Arabia.

The overall level of attitudes among Saudi public were Moderate toward participation in CTs. The Saudi public believes that CTs might provide benefits for society as a whole and for the subjects in the CTs. Additionally, trust in the study team may explain the favorable attitudes toward participation in CTs. It could be argued that the participants' answers might change in real-life situations such as in healthcare settings. Nevertheless, our results were consistent with other studies conducted in the health care settings in Saudi Arabia that investigated patients'/families' opinions regarding participation in CTs.<sup>16-18</sup>

Similarly, but to a lesser degree, the Saudi public agreed with the idea of conducting pediatric CTs for approved/off-label drugs. However, only 48% of the survey participants found that it was acceptable to test new drugs in pediatric subjects. Objection to the use of new drugs or vaccines was one of the factors underlying the opposition to pediatric CTs<sup>26</sup>. Although the study didn't assess the reasons behind

1  
2 motivation to participate in CTs, we believe that the fear of adverse events, as well as  
3  
4 safety concerns, may explain this objection.<sup>25,27</sup>  
5  
6

7 Phase I CTs, which involve testing of new drugs in healthy volunteers, are  
8  
9 important in the process of drug development. However, several ethical dilemmas affect  
10  
11 the ability of these studies to be conducted on healthy volunteers and patients.<sup>28</sup> In our  
12  
13 study, the Saudi public showed negative opinions toward testing new drugs on healthy  
14  
15 volunteers. Only 30.5% of participants agreed with the idea of conducting CTs on  
16  
17 healthy volunteers in Saudi Arabia. This sentiment may be related to the lack of  
18  
19 knowledge regarding the purpose of testing new drugs on healthy volunteers.  
20  
21  
22

23 Conduction of educational campaigns for public about CTs in Saudi Arabia is crucial to  
24  
25 improve their knowledge and awareness about CTs.  
26  
27

28 Consistent with other studies<sup>9,11</sup>, our results revealed that participant attitudes  
29  
30 toward CTs were markedly dependent on their knowledge of CTs. We predict that as  
31  
32 knowledge about CTs increases, the Saudi public will show more positive attitudes  
33  
34 toward them. A low level of knowledge regarding CTs may indicate misunderstandings  
35  
36 or confusion regarding the purposes of the different phases of CTs. In turn, participants'  
37  
38 answers may have been affected by insufficient knowledge. We believe that many  
39  
40 respondents used their common sense to answer some survey questions and may have  
41  
42 begun to recognize the meaning of CTs while answering further questions. These  
43  
44 observations suggest for the need for public educational campaigns about CTs,  
45  
46 particularly when the majority of respondents were interested to have more information  
47  
48 about CTs.  
49  
50  
51  
52

53 Male gender, less education, lack of a medical background, less monthly income,  
54  
55 a lower age group, and lack of health insurance were independent predictors of a low  
56  
57  
58  
59  
60

1  
2 level of knowledge regarding CTs among the Saudi public. Male gender, less education  
3  
4 and lack of a medical background were independent predictors of negative attitudes  
5  
6 toward CTs. Our results were consistent with a United States household survey  
7  
8 conducted to assess levels of public participation in and awareness of clinical and  
9  
10 translational research, in which higher levels of income and education were associated  
11  
12 with better participation and awareness.<sup>29</sup> In a study on patients with cancer in a  
13  
14 healthcare setting, lower amounts of education and income were associated with  
15  
16 decreased awareness toward CTs, as were race and ethnicity<sup>9</sup>. Similarly, lower  
17  
18 incomes and education, were associated with reduced willingness to participate in CTs  
19  
20 in African-American patients with cancer<sup>30</sup>. A study of patients with cancer in Saudi  
21  
22 Arabia found that higher education was the only significant predictor of trial  
23  
24 participation.<sup>17</sup>  
25  
26  
27  
28  
29

30 Unlike other studies on the public or in healthcare settings<sup>5,9,25,31-33</sup>, gender was  
31  
32 an independent predictor of knowledge and attitudes. Males were associated with a  
33  
34 lower level of knowledge and with more negative attitudes toward CTs. The underlying  
35  
36 rationale has not been clearly discussed in the literature. However, we believe that  
37  
38 gender differences regarding knowledge and attitudes toward CTs should be  
39  
40 considered for future studies.  
41  
42  
43

44 While previous studies have looked at knowledge and attitudes toward CTs in  
45  
46 Saudi Arabia, they were much smaller and mainly involved surveying patients and/or  
47  
48 their families in healthcare settings.<sup>17,18</sup> To our knowledge, this is the first study of Saudi  
49  
50 public knowledge and attitudes toward CTs outside of a healthcare setting.  
51  
52 Furthermore, it is the first study to solicit public opinions on the way different phases of  
53  
54 CTs are conducted in adult and pediatric populations.  
55  
56  
57  
58  
59  
60

## Conclusion

The Saudi public has a low level of knowledge and moderate level attitudes toward CTs. Increasing Saudi public knowledge regarding CTs may contribute to positive attitudes toward participation in and support of CTs. Accordingly, we suggest the use of educational campaigns to increase awareness and knowledge of CTs among the Saudi public. These campaigns should be targeted preferentially to the less knowledgeable populations identified in this study and focusing on the importance of testing new drugs on healthy volunteers (phase I clinical trials). In addition, our results support the conduction and investment of CTs in KSA. Conducting similar studies in the future, taking the limitations of this study into consideration, may be helpful for measuring the improvement of knowledge over time. We also recommend in-depth qualitative and focus-group-based studies for a better understanding of participant responses.

## Study limitations

The main limitation in this study is related to the possible selection bias as a result of using of convenience sampling; however we believe that this limitation can be partial due to the large number and the diversity of the visitors.

## Abbreviations

ANOVA: Analysis of variance

CTs: Clinical Trials

IRB: Institutional review board

KSA: Kingdom of Saudi Arabia

1  
2 SAR: Saudi Arabian Riyal

3  
4 S.D: Standard Deviation

5  
6 SFDA: Saudi Food and Drug Authority

7  
8  
9 USD: United States Dollar

## 10 11 12 13 14 15 16 17 18 19 20 21 22 23 24 25 26 27 28 29 30 31 32 33 34 35 36 37 38 39 40 41 42 43 44 45 46 47 48 49 50 51 52 53 54 55 56 57 58 59 60

1. Oxford Centre for Evidence-based Medicine – Levels of Evidence. 2009. 2017, at [http://www.cebm.net/oxford-centre-evidence-based-medicine-levels-evidence-march-2009/.](http://www.cebm.net/oxford-centre-evidence-based-medicine-levels-evidence-march-2009/))
2. Wyse RK. Accelerating patient recruitment in clinical trials: in-depth report from the SMi 2nd annual conference In: Ross C, editor. The SMi 2nd annual conference 2006; London: NetworkPharma Ltd.
3. Verheggen FW, Nieman FH, Reerink E, Kok GJ. Patient satisfaction with clinical trial participation. *Int J Qual Health Care* 1998;10:319-30.
4. Public Engagement and Clinical Trials: New Models and Disruptive Technologies: Workshop Summary. Washington (DC)2012.
5. Leiter A, Diefenbach MA, Doucette J, Oh WK, Galsky MD. Clinical trial awareness: Changes over time and sociodemographic disparities. *Clin Trials* 2015;12:215-23.
6. The Need for Awareness of Clinical Research. National Institute of Health, 2016. 2017, at [https://www.nih.gov/health-information/nih-clinical-research-trials-you/need-awareness-clinical-research.\)](https://www.nih.gov/health-information/nih-clinical-research-trials-you/need-awareness-clinical-research.)
7. Kim SH, Tanner A, Friedman DB, Foster C, Bergeron C. Barriers to Clinical Trial Participation: Comparing Perceptions and Knowledge of African American and White South Carolinians. *J Health Commun* 2015;20:816-26.
8. Kim SH, Tanner A, Friedman DB, Foster C, Bergeron CD. Barriers to clinical trial participation: a comparison of rural and urban communities in South Carolina. *J Community Health* 2014;39:562-71.
9. Lara PN, Jr., Paterniti DA, Chiechi C, et al. Evaluation of factors affecting awareness of and willingness to participate in cancer clinical trials. *J Clin Oncol* 2005;23:9282-9.
10. Joshi V, Kulkarni AA. Public awareness of clinical trials: A qualitative pilot study in Pune. *Perspect Clin Res* 2012;3:125-32.
11. Miller S, Hudson S, Egleston B, et al. The relationships among knowledge, self-efficacy, preparedness, decisional conflict and decisions to participate in a cancer clinical trial. *Psychooncology* 2013;22: 481–9.
12. Denicoff AM, McCaskill-Stevens W, Grubbs SS, et al. The National Cancer Institute-American Society of Clinical Oncology Cancer Trial Accrual Symposium: summary and recommendations. *J Oncol Pract* 2013;9:267-76.
13. Trantham LC, Carpenter WR, DiMartino LD, et al. Perceptions of Cancer Clinical Research Among African American Men in North Carolina. *J Natl Med Assoc* 2015;107:33-41.
14. Featherstone K, Donovan JL. "Why don't they just tell me straight, why allocate it?" The struggle to make sense of participating in a randomised controlled trial. *Soc Sci Med* 2002;55:709-19.
15. Jamjoom AB, Jamjoom AM, Samman AM, Gahtani AY. Fate of registered clinical trials performed in Saudi Arabia. *Saudi Med J* 2015;36:1245-8.

16. Bazarbashi S, Hassan A, Eldin AM, Soudy H, Hussain F. Awareness and Perceptions of Clinical Trials in Cancer Patients and Their Families in Saudi Arabia. *J Cancer Educ* 2015;30:655-9.
17. Sheblaq NR, Traifi S, Sakiani MA, Gasmelseed A, Abolfotouh MA, Jazieh AR. Awareness and attitude of cancer patients about participation in clinical research (CR) in Saudi Arabia. *J Clin Oncol* 2013;(suppl; abstr e17528).
18. Al-Tannir MA, El-Bakri N, Abu-Shaheen AK. Knowledge, Attitudes and Perceptions of Saudis towards Participating in Clinical Trials. *PLoS One* 2016;11:e0143893.
19. Al-Dakhil LO, Alanazy R, Al-Hamed RE, Al-Mandeel H, Alobaid A. Attitudes of Patients in Developing Countries Toward Participating in Clinical Trials: A Survey of Saudi Patients Attending Primary Health Care Services. *Oman Med J* 2016;31:284-9.
20. Almutairi KM, Alonazi WB, Alodhayani AA, et al. Barriers to Cancer Clinical Trial Participation Among Saudi Nationals: A Cross-Sectional Study. *J Relig Health* 2017;56:623-34.
21. The Central Department of Statistics and Information 2016. (Accessed 24/04/2017, 2017, at [https://www.stats.gov.sa/sites/default/files/en-demographic-research-2016\\_4.pdf](https://www.stats.gov.sa/sites/default/files/en-demographic-research-2016_4.pdf).)
22. Abdullahi A, Hassan A, Kadarman N, Saleh A, Baraya YuSa, Lua PL. Food safety knowledge, attitude, and practice toward compliance with abattoir laws among the abattoir workers in Malaysia. *International journal of general medicine* 2016;9:79-87.
23. Nur Ain M, Azfar M, Omarulharis S, et al. Knowledge, Attitude And Practice Of Dengue Prevention Among Sub Urban Community In Sepang, Selangor. *International Journal of Public Health and Clinical Sciences* 2017;4:73-83.
24. Malhotra V, Kaura S, Sharma H. Knowledge, attitude and practices about hepatitis B and Infection Control Measures among dental students in Patiala. *Journal of Dental and Allied Sciences* 2017;6:65-9.
25. Choi YJ, Beck SH, Kang WY, et al. Knowledge and Perception about Clinical Research Shapes Behavior: Face to Face Survey in Korean General Public. *J Korean Med Sci* 2016;31:674-81.
26. Nasef N, Shabaan A, Mohammed S, et al. Factors influencing parental consent for participation in clinical research involving their children in Egypt. *East Mediterr Health J* 2014;20:162-8.
27. Nabulsi M, Khalil Y, Makhoul J. Parental attitudes towards and perceptions of their children's participation in clinical research: a developing-country perspective. *J Med Ethics* 2011;37:420-3.
28. Elliott C, Abadie R. Exploiting a research underclass in phase 1 clinical trials. *N Engl J Med* 2008;358:2316-7.
29. Davis MM, Clark SJ, Butchart AT, Singer DC, Shanley TP, Gipson DS. Public participation in, and awareness about, medical research opportunities in the era of clinical and translational research. *Clin Transl Sci* 2013;6:88-93.
30. Advani AS, Atkeson B, Brown CL, et al. Barriers to the participation of African-American patients with cancer in clinical trials: a pilot study. *Cancer* 2003;97:1499-506.
31. Comis RL, Miller JD, Aldige CR, Krebs L, Stoval E. Public attitudes toward participation in cancer clinical trials. *J Clin Oncol* 2003;21:830-5.
32. Joshi VD, Oka GA, Kulkarni AA, Bivalkar VV. Public awareness and perception of clinical trials: Quantitative study in Pune. *Perspect Clin Res* 2013;4:169-74.
33. Ohmann C, Deimling A. Attitude towards clinical trials: results of a survey of persons interested in research. *Inflamm Res* 2004;53 Suppl 2:S142-7.

Table 1. Characteristics of the study participants and the unadjusted predictors for knowledge and attitudes

| Characteristics                                                         | Group                                           | Overall<br>N = 938 |      | Knowledge<br>Overall mean = 56.8 ±<br>24.8 |      |        | Attitudes<br>Overall mean = 61.5 ±<br>28.0 |      |        |
|-------------------------------------------------------------------------|-------------------------------------------------|--------------------|------|--------------------------------------------|------|--------|--------------------------------------------|------|--------|
|                                                                         |                                                 | N                  | %    | Mean                                       | s.d. | P      | Mean                                       | s.d. | P      |
| Gender                                                                  | Male                                            | 577                | 61.6 | 51.37                                      | 24.4 | 0.001* | 57.40                                      | 28.0 | 0.001* |
|                                                                         | Female                                          | 360                | 38.4 | 65.62                                      | 22.9 |        | 67.90                                      | 26.8 |        |
| Age                                                                     | 18–30                                           | 508                | 54.2 | 55.45                                      | 26.0 | 0.001* | 59.36                                      | 28.2 | 0.007* |
|                                                                         | 31–40                                           | 259                | 27.6 | 60.07                                      | 23.2 |        | 63.28                                      | 27.8 |        |
|                                                                         | 41–60                                           | 153                | 16.3 | 58.17                                      | 22.0 |        | 66.67                                      | 26.0 |        |
|                                                                         | 61+                                             | 18                 | 1.9  | 37.50                                      | 22.7 |        | 50.62                                      | 34.1 |        |
| Education                                                               | Not educated                                    | 27                 | 2.9  | 35.19                                      | 18.0 | 0.001* | 46.09                                      | 29.8 | 0.001* |
|                                                                         | High school or less                             | 347                | 37.0 | 48.37                                      | 22.7 |        | 57.25                                      | 28.0 |        |
|                                                                         | University, college or more                     | 563                | 60.1 | 63.06                                      | 24.2 |        | 64.81                                      | 27.3 |        |
| Monthly income                                                          | •No income                                      | 195                | 20.8 | 49.62                                      | 22.7 | 0.001* | 57.78                                      | 28.5 | 0.084  |
|                                                                         | •Less than 5,000 SAR<br>•Less than 1,300 USD    | 280                | 29.9 | 56.13                                      | 26.1 |        | 62.02                                      | 27.2 |        |
|                                                                         | •5,001 to 10,000 SAR<br>•1,301 to 2,700 USD     | 234                | 25.0 | 56.73                                      | 23.0 |        | 60.64                                      | 28.2 |        |
|                                                                         | •SAR 10,001 to 15,000<br>•USD 2,701 to 4,000    | 148                | 15.8 | 61.43                                      | 24.2 |        | 63.74                                      | 28.0 |        |
|                                                                         | •More than 15,000 SAR<br>•More than 4,000 USD   | 79                 | 8.5  | 68.88                                      | 25.3 |        | 67.37                                      | 27.9 |        |
|                                                                         |                                                 |                    |      |                                            |      |        |                                            |      |        |
| Nationality                                                             | Saudi                                           | 817                | 87.3 | 57.27                                      | 24.6 | 0.143  | 62.10                                      | 27.7 | 0.095  |
|                                                                         | Non-Saudi                                       | 119                | 12.7 | 53.71                                      | 25.8 |        | 57.52                                      | 29.4 |        |
| Residency                                                               | Central region                                  | 707                | 75.4 | 59.21                                      | 24.4 | 0.001* | 62.93                                      | 28.5 | 0.055  |
|                                                                         | Western region                                  | 86                 | 9.2  | 52.52                                      | 27.6 |        | 59.04                                      | 28.3 |        |
|                                                                         | Northern region                                 | 59                 | 6.3  | 46.19                                      | 25.0 |        | 53.48                                      | 25.1 |        |
|                                                                         | Southern region                                 | 60                 | 6.4  | 49.31                                      | 20.7 |        | 57.04                                      | 22.5 |        |
|                                                                         | Eastern region                                  | 26                 | 2.8  | 47.76                                      | 21.3 |        | 58.12                                      | 26.9 |        |
| Marital Status                                                          | Single                                          | 455                | 48.7 | 56.06                                      | 26.7 | 0.549  | 60.59                                      | 28.3 | 0.130  |
|                                                                         | Married                                         | 444                | 47.5 | 57.04                                      | 22.8 |        | 61.61                                      | 27.5 |        |
|                                                                         | Other                                           | 35                 | 3.8  | 60.48                                      | 22.1 |        | 70.48                                      | 28.8 |        |
| Employment                                                              | Student in school                               | 78                 | 8.3  | 47.54                                      | 24.0 | 0.001* | 56.13                                      | 27.4 | 0.028* |
|                                                                         | Undergraduate student/<br>university or college | 166                | 17.8 | 63.15                                      | 26.0 |        | 65.66                                      | 25.6 |        |
|                                                                         | Government sector                               | 235                | 25.0 | 61.70                                      | 24.1 |        | 64.68                                      | 28.1 |        |
|                                                                         | Private sector                                  | 208                | 22.2 | 56.29                                      | 25.4 |        | 59.56                                      | 28.0 |        |
|                                                                         | Military                                        | 54                 | 5.7  | 52.16                                      | 23.2 |        | 55.76                                      | 30.6 |        |
|                                                                         | Private work/ owner                             | 61                 | 6.8  | 50.68                                      | 22.5 |        | 56.65                                      | 31.1 |        |
|                                                                         | Retired                                         | 26                 | 2.7  | 51.92                                      | 21.9 |        | 65.38                                      | 31.5 |        |
|                                                                         | Not working                                     | 62                 | 6.6  | 44.49                                      | 21.7 |        | 57.17                                      | 26.3 |        |
|                                                                         | Housewife                                       | 47                 | 4.9  | 59.22                                      | 18.9 |        | 64.30                                      | 26.2 |        |
| Health insurance                                                        | Governmental                                    | 560                | 59.7 | 58.23                                      | 25.2 | 0.001* | 64.09                                      | 27.4 | 0.001* |
|                                                                         | Private                                         | 116                | 12.4 | 58.41                                      | 25.0 |        | 58.43                                      | 30.1 |        |
|                                                                         | Other                                           | 226                | 24.1 | 55.20                                      | 22.5 |        | 58.46                                      | 27.4 |        |
|                                                                         | No insurance                                    | 36                 | 3.8  | 40.05                                      | 24.9 |        | 49.38                                      | 28.8 |        |
| Chronic disease                                                         | Yes                                             | 208                | 22.2 | 53.21                                      | 23.7 | 0.183  | 59.19                                      | 27.7 | 0.183  |
|                                                                         | No                                              | 730                | 77.8 | 57.85                                      | 25.0 |        | 62.12                                      | 28.0 |        |
| Medical background                                                      | Yes                                             | 259                | 27.7 | 65.99                                      | 26.6 | 0.017* | 67.35                                      | 27.5 | 0.001* |
|                                                                         | No                                              | 677                | 72.3 | 53.37                                      | 23.1 | 0.001* | 59.23                                      | 27.9 |        |
| Previous medical<br>research participation                              | Yes                                             | 149                | 15.9 | 65.83                                      | 25.8 | 0.001* | 66.44                                      | 27.6 | 0.001* |
|                                                                         | Was requested, but didn't<br>participate        | 11                 | 1.1  | 50.00                                      | 22.4 |        | 63.64                                      | 27.3 |        |
|                                                                         | No                                              | 737                | 78.6 | 55.54                                      | 24.3 |        | 60.65                                      | 28.1 |        |
| Do you know<br>somebody who has<br>participated in medical<br>research? | Yes                                             | 41                 | 4.4  | 48.98                                      | 22.3 | 0.001* | 57.45                                      | 26.0 | 0.100  |
|                                                                         | No                                              | 248                | 26.5 | 60.42                                      | 24.6 |        | 62.23                                      | 27.6 |        |
|                                                                         | Not sure                                        | 596                | 63.6 | 57.30                                      | 24.6 |        | 62.99                                      | 27.8 |        |
|                                                                         | Not sure                                        | 93                 | 9.9  | 44.18                                      | 23.1 |        | 49.46                                      | 27.7 |        |

\* Significant at  $\alpha = 0.05$ .



**Table 2. Participants' responses to the knowledge questions**

| <b>Variables</b>                                                                      | <b>N (% of participants)</b> |
|---------------------------------------------------------------------------------------|------------------------------|
| <b>Have you heard about clinical trials before?</b>                                   |                              |
| Yes                                                                                   | 289 (30.8)                   |
| No/not sure                                                                           | 648 (69.1)                   |
| <b>What is the definition of a clinical trial?</b>                                    |                              |
| Studies in clinics to survey patients opinion about health care topics                | 139 (14.8)                   |
| Experiments on animals                                                                | 119 (12.7)                   |
| Studies to test new drugs or procedure on humans                                      | 410 (43.7)                   |
| Graduation projects for medical students                                              | 62 (6.6)                     |
| Not sure                                                                              | 208 (22.2)                   |
| <b>Have you heard about an IRB before?</b>                                            |                              |
| Yes                                                                                   | 251 (26.8)                   |
| No                                                                                    | 685 (73.1)                   |
| <b>Have you heard of the SFDA before?</b>                                             |                              |
| Yes                                                                                   | 761 (81.1)                   |
| No                                                                                    | 177 (18.9)                   |
| <b>Does the SFDA have a role in regulating clinical trials?</b>                       |                              |
| Yes                                                                                   | 622 (66.4)                   |
| No                                                                                    | 315 (33.6)                   |
| <b>Is there an ethical guidelines to regulate the conduction of clinical trials?</b>  |                              |
| Yes                                                                                   | 673 (71.8)                   |
| No                                                                                    | 265 (28.3)                   |
| <b>Are there a direct benefits for participants to conduct Clinical Trials?</b>       |                              |
| Definitely                                                                            | 313 (33.4)                   |
| Definitely not                                                                        | 35 (3.7)                     |
| No benefit or harm                                                                    | 19 (2.0)                     |
| Possible benefit or harm                                                              | 436 (46.5)                   |
| Not sure                                                                              | 135 (14.4)                   |
| <b>Are there a direct benefits for community to conduct Clinical Trials?</b>          |                              |
| Yes                                                                                   | 676 (72.1)                   |
| No                                                                                    | 262 (27.9)                   |
| <b>When can an investigator start clinical trials?</b>                                |                              |
| Any time they want                                                                    | 42 (4.5)                     |
| Only with participant agreement                                                       | 135 (14.4)                   |
| After obtaining manager approval                                                      | 41 (4.4)                     |
| They should obtain approvals from responsible authorities                             | 525 (56.0)                   |
| Not sure                                                                              | 195 (20.8)                   |
| <b>Can an investigator recruit patients without their approval?</b>                   |                              |
| Yes                                                                                   | 250 (26.7)                   |
| No                                                                                    | 687 (73.3)                   |
| <b>Can participants freely withdraw from clinical trials anytime?</b>                 |                              |
| Yes                                                                                   | 446 (47.6)                   |
| No                                                                                    | 492 (52.5)                   |
| <b>May published articles include confidential patient information (e.g., names)?</b> |                              |
| Yes                                                                                   | 318 (33.9)                   |
| No                                                                                    | 620 (66.1)                   |
| <b>Knowledge score out of 100 (12 questions)</b>                                      | <b>56.8 ± 24.8</b>           |

IRB: Institutional Review Board; SFDA: Saudi Food Drug Authority



**Table 3. Participants' responses to the attitudes questions**

| <b>Variables</b>                                                                       | <b>n (%)</b>       |
|----------------------------------------------------------------------------------------|--------------------|
| Do you agree with testing new drugs in patients?                                       |                    |
| Yes                                                                                    | 558 (59.5)         |
| No/not sure                                                                            | 380 (40.5)         |
| Do you agree with testing approved drugs in patients?                                  |                    |
| Yes                                                                                    | 593 (63.2)         |
| No/not sure                                                                            | 345 (36.8)         |
| Do you agree with testing new drugs in healthy volunteers?                             |                    |
| Yes                                                                                    | 286 (30.5)         |
| No/not sure                                                                            | 651 (69.5)         |
| Do you agree with testing new drugs in pediatric patients?                             |                    |
| Yes                                                                                    | 452 (48.2)         |
| No/not sure                                                                            | 485 (51.8)         |
| Do you agree with testing approved drugs in pediatric patients?                        |                    |
| Yes                                                                                    | 528 (56.4)         |
| No/not sure                                                                            | 409 (43.7)         |
| Do you agree with participating/having a family member participate in clinical trials? |                    |
| Yes                                                                                    | 252 (26.9)         |
| Possibly                                                                               | 395 (42.2)         |
| No/not sure                                                                            | 290 (31.0)         |
| What is your perception regarding clinical trials?                                     |                    |
| Not important                                                                          | 41 (4.4)           |
| Very important for drug development                                                    | 682 (72.7)         |
| Important only for pharmaceutical companies to earn money                              | 54 (5.8)           |
| Not sure                                                                               | 161 (17.2)         |
| Are you willing to learn about clinical trials?                                        |                    |
| Yes                                                                                    | 814 (86.8)         |
| No                                                                                     | 124 (13.2)         |
| Do you trust research teams?                                                           |                    |
| Yes                                                                                    | 629 (67.1)         |
| No/not sure                                                                            | 309 (32.9)         |
| Attitude score out of 100 (9 questions)                                                | <b>61.5 ± 28.0</b> |

Table 4. Independent predictors of the Saudi public knowledge and attitudes toward clinical trials

| Characteristics                                                     | Knowledge |             |        |        | Attitudes |             |       |        |
|---------------------------------------------------------------------|-----------|-------------|--------|--------|-----------|-------------|-------|--------|
|                                                                     | B         | 95% Wald CI |        | P      | B         | 95% Wald CI |       | P      |
| (Intercept)                                                         | 48.2      | 26.83       | 69.48  | 0.001* | 57.4      | 30.72       | 84.01 | 0.001* |
| Gender (reference: female)                                          |           |             |        |        |           |             |       |        |
| <i>Male</i>                                                         | -14.1     | -17.49      | -10.65 | 0.001* | -9.2      | -13.42      | -4.88 | 0.001* |
| Age (reference: 61+)                                                |           |             |        |        |           |             |       |        |
| <i>18–30</i>                                                        | 9.2       | -2.86       | 21.31  | 0.135  | -0.8      | -15.87      | 14.33 | 0.920  |
| <i>31–40</i>                                                        | 11.2      | -0.56       | 22.92  | 0.062  | 3.7       | -10.98      | 18.34 | 0.623  |
| <i>41–60</i>                                                        | 12.1      | 0.80        | 23.44  | 0.036* | 10.6      | -3.55       | 24.73 | 0.142  |
| Education (reference: University, college or more)                  |           |             |        |        |           |             |       |        |
| <i>Not educated</i>                                                 | -19.6     | -29.64      | -9.66  | 0.001* | -18.4     | -30.88      | -5.92 | 0.004* |
| <i>High school or less</i>                                          | -8.2      | -12.10      | -4.37  | 0.001* | -5.1      | -9.94       | -0.29 | 0.038* |
| Monthly income (reference: SR 15,000 or more)                       |           |             |        |        |           |             |       |        |
| <i>No income</i>                                                    | -9.7      | -17.17      | -2.19  | 0.011* | -1.0      | -10.38      | 8.34  | 0.831  |
| <i>SR 5,000 or less</i>                                             | -9.1      | -15.48      | -2.79  | 0.005* | 0.4       | -7.50       | 8.35  | 0.916  |
| <i>SR 6,000 to SR 10,000</i>                                        | -6.9      | -12.71      | -1.00  | 0.022* | 0.0       | -7.36       | 7.28  | 0.992  |
| <i>SR 11,000 to SR 15,000</i>                                       | -3.6      | -9.65       | 2.38   | 0.236  | 1.2       | -6.28       | 8.73  | 0.749  |
| Nationality (reference: non-Saudi)                                  |           |             |        |        |           |             |       |        |
| <i>Saudi</i>                                                        | -1.6      | -6.80       | 3.63   | 0.552  | 1.0       | -5.52       | 7.51  | 0.764  |
| Residency (reference: Eastern region)                               |           |             |        |        |           |             |       |        |
| <i>Central region</i>                                               | 3.6       | -4.94       | 12.05  | 0.412  | -0.5      | -11.14      | 10.08 | 0.922  |
| <i>Western region</i>                                               | 1.9       | -7.60       | 11.39  | 0.696  | -0.9      | -12.73      | 11.00 | 0.886  |
| <i>Northern region</i>                                              | -10.8     | -20.77      | -0.76  | 0.035* | -12.7     | -25.19      | -0.20 | 0.046* |
| <i>Southern region</i>                                              | -1.1      | -10.89      | 8.76   | 0.832  | -5.3      | -17.61      | 6.93  | 0.393  |
| Marital Status (reference: other)                                   |           |             |        |        |           |             |       |        |
| <i>Single</i>                                                       | 1.4       | -6.94       | 9.81   | 0.736  | -3.1      | -13.55      | 7.37  | 0.563  |
| <i>Married</i>                                                      | 0.9       | -6.80       | 8.67   | 0.813  | -4.5      | -14.17      | 5.15  | 0.360  |
| Employment (reference: housewife)                                   |           |             |        |        |           |             |       |        |
| <i>Student</i>                                                      | -5.1      | -14.08      | 3.97   | 0.272  | 2.1       | -9.21       | 13.34 | 0.719  |
| <i>Undergraduate student</i>                                        | 0.2       | -8.60       | 8.99   | 0.965  | 3.7       | -7.26       | 14.71 | 0.506  |
| <i>Government sector</i>                                            | -3.0      | -11.56      | 5.55   | 0.491  | 1.0       | -9.70       | 11.67 | 0.857  |
| <i>Private sector</i>                                               | -5.1      | -13.65      | 3.51   | 0.247  | -1.0      | -11.75      | 9.69  | 0.850  |
| <i>Military</i>                                                     | -10.3     | -20.56      | -0.03  | 0.049* | -0.9      | -13.75      | 11.89 | 0.887  |
| <i>Private work</i>                                                 | -6.4      | -15.54      | 2.72   | 0.169  | -2.8      | -14.18      | 8.64  | 0.634  |
| <i>Retired</i>                                                      | -0.3      | -11.73      | 11.19  | 0.963  | 8.5       | -5.86       | 22.76 | 0.247  |
| <i>Not working</i>                                                  | -5.2      | -14.01      | 3.53   | 0.241  | 3.5       | -7.45       | 14.45 | 0.531  |
| Health insurance (reference: no insurance)                          |           |             |        |        |           |             |       |        |
| <i>Governmental</i>                                                 | 12.9      | 4.48        | 21.33  | 0.003* | 10.1      | -0.45       | 20.60 | 0.061  |
| <i>Private</i>                                                      | 16.5      | 7.06        | 25.95  | 0.001* | 4.4       | -7.42       | 16.18 | 0.467  |
| <i>Other</i>                                                        | 12.8      | 4.49        | 21.08  | 0.003* | 7.9       | -2.50       | 18.22 | 0.137  |
| Chronic diseases (reference: yes)                                   |           |             |        |        |           |             |       |        |
| <i>No</i>                                                           | -2.2      | -5.75       | 1.27   | 0.211  | -3.5      | -7.91       | 0.87  | 0.116  |
| Medical background (reference: yes)                                 |           |             |        |        |           |             |       |        |
| <i>No</i>                                                           | -4.7      | -8.47       | -0.90  | 0.015* | -5.0      | -9.70       | -0.24 | 0.039* |
| Participated in medical research (reference: no)                    |           |             |        |        |           |             |       |        |
| <i>Yes</i>                                                          | 6.0       | -1.78       | 13.77  | 0.131  | 1.7       | -8.04       | 11.38 | 0.736  |
| Knows somebody who participated in medical research (reference: no) |           |             |        |        |           |             |       |        |

1  
2  
3  
4  
5  
6  
7  
8  
9  
10  
11  
12  
13  
14  
15  
16  
17  
18  
19  
20  
21  
22  
23  
24  
25  
26  
27  
28  
29  
30  
31  
32  
33  
34  
35  
36  
37  
38  
39  
40  
41  
42  
43  
44  
45  
46  
47  
48  
49  
50  
51  
52  
53  
54  
55  
56  
57  
58  
59  
60

|     |      |      |       |        |      |      |       |        |
|-----|------|------|-------|--------|------|------|-------|--------|
| Yes | 12.3 | 7.07 | 17.55 | 0.001* | 10.4 | 3.88 | 16.97 | 0.002* |
|-----|------|------|-------|--------|------|------|-------|--------|

\*Significant at  $\alpha = 0.05$ . CI, confidence interval.

For peer review only

STROBE Statement—Checklist of items that should be included in reports of *cross-sectional studies*

|                           | Item No | Recommendation                                                                                                                                                                                               | Page No |
|---------------------------|---------|--------------------------------------------------------------------------------------------------------------------------------------------------------------------------------------------------------------|---------|
| <b>Title and abstract</b> | 1       | (a) Indicate the study's design with a commonly used term in the title or the abstract                                                                                                                       | 1       |
|                           |         | (b) Provide in the abstract an informative and balanced summary of what was done and what was found                                                                                                          | 4       |
| <b>Introduction</b>       |         |                                                                                                                                                                                                              |         |
| Background/rationale      | 2       | Explain the scientific background and rationale for the investigation being reported                                                                                                                         | 6       |
| Objectives                | 3       | State specific objectives, including any prespecified hypotheses                                                                                                                                             | 7       |
| <b>Methods</b>            |         |                                                                                                                                                                                                              |         |
| Study design              | 4       | Present key elements of study design early in the paper                                                                                                                                                      | 7       |
| Setting                   | 5       | Describe the setting, locations, and relevant dates, including periods of recruitment, exposure, follow-up, and data collection                                                                              | 7       |
| Participants              | 6       | (a) Give the eligibility criteria, and the sources and methods of selection of participants                                                                                                                  | 8       |
| Variables                 | 7       | Clearly define all outcomes, exposures, predictors, potential confounders, and effect modifiers. Give diagnostic criteria, if applicable                                                                     | 8       |
| Data sources/measurement  | 8*      | For each variable of interest, give sources of data and details of methods of assessment (measurement). Describe comparability of assessment methods if there is more than one group                         | 9       |
| Bias                      | 9       | Describe any efforts to address potential sources of bias                                                                                                                                                    | 9       |
| Study size                | 10      | Explain how the study size was arrived at                                                                                                                                                                    | 8       |
| Quantitative variables    | 11      | Explain how quantitative variables were handled in the analyses. If applicable, describe which groupings were chosen and why                                                                                 | 9       |
| Statistical methods       | 12      | (a) Describe all statistical methods, including those used to control for confounding                                                                                                                        | 10      |
|                           |         | (b) Describe any methods used to examine subgroups and interactions                                                                                                                                          | 10      |
|                           |         | (c) Explain how missing data were addressed                                                                                                                                                                  |         |
|                           |         | (d) If applicable, describe analytical methods taking account of sampling strategy                                                                                                                           | 8       |
|                           |         | (e) Describe any sensitivity analyses                                                                                                                                                                        |         |
| <b>Results</b>            |         |                                                                                                                                                                                                              |         |
| Participants              | 13*     | (a) Report numbers of individuals at each stage of study—eg numbers potentially eligible, examined for eligibility, confirmed eligible, included in the study, completing follow-up, and analysed            | 10      |
|                           |         | (b) Give reasons for non-participation at each stage                                                                                                                                                         | 10      |
|                           |         | (c) Consider use of a flow diagram                                                                                                                                                                           |         |
| Descriptive data          | 14*     | (a) Give characteristics of study participants (eg demographic, clinical, social) and information on exposures and potential confounders                                                                     | 10      |
|                           |         | (b) Indicate number of participants with missing data for each variable of interest                                                                                                                          |         |
| Outcome data              | 15*     | Report numbers of outcome events or summary measures                                                                                                                                                         | 11      |
| Main results              | 16      | (a) Give unadjusted estimates and, if applicable, confounder-adjusted estimates and their precision (eg, 95% confidence interval). Make clear which confounders were adjusted for and why they were included | 11      |

|                          |    |                                                                                                                                                                            |    |
|--------------------------|----|----------------------------------------------------------------------------------------------------------------------------------------------------------------------------|----|
|                          |    | (b) Report category boundaries when continuous variables were categorized                                                                                                  | 11 |
|                          |    | (c) If relevant, consider translating estimates of relative risk into absolute risk for a meaningful time period                                                           |    |
| Other analyses           | 17 | Report other analyses done—eg analyses of subgroups and interactions, and sensitivity analyses                                                                             |    |
| <b>Discussion</b>        |    |                                                                                                                                                                            |    |
| Key results              | 18 | Summarise key results with reference to study objectives                                                                                                                   | 14 |
| Limitations              | 19 | Discuss limitations of the study, taking into account sources of potential bias or imprecision. Discuss both direction and magnitude of any potential bias                 | 18 |
| Interpretation           | 20 | Give a cautious overall interpretation of results considering objectives, limitations, multiplicity of analyses, results from similar studies, and other relevant evidence | 15 |
| Generalisability         | 21 | Discuss the generalisability (external validity) of the study results                                                                                                      | 17 |
| <b>Other information</b> |    |                                                                                                                                                                            |    |
| Funding                  | 22 | Give the source of funding and the role of the funders for the present study and, if applicable, for the original study on which the present article is based              | 2  |

\*Give information separately for exposed and unexposed groups.

**Note:** An Explanation and Elaboration article discusses each checklist item and gives methodological background and published examples of transparent reporting. The STROBE checklist is best used in conjunction with this article (freely available on the Web sites of PLoS Medicine at <http://www.plosmedicine.org/>, Annals of Internal Medicine at <http://www.annals.org/>, and Epidemiology at <http://www.epidem.com/>). Information on the STROBE Initiative is available at [www.strobe-statement.org](http://www.strobe-statement.org).

# BMJ Open

## Knowledge of and Attitudes toward Clinical Trials in Saudi Arabia: A Cross-sectional study

|                                 |                                                                                                                                                                                                                                                                                                                                                                                                                                                                                                                                                                                                                                                                                                                                                                                         |
|---------------------------------|-----------------------------------------------------------------------------------------------------------------------------------------------------------------------------------------------------------------------------------------------------------------------------------------------------------------------------------------------------------------------------------------------------------------------------------------------------------------------------------------------------------------------------------------------------------------------------------------------------------------------------------------------------------------------------------------------------------------------------------------------------------------------------------------|
| Journal:                        | <i>BMJ Open</i>                                                                                                                                                                                                                                                                                                                                                                                                                                                                                                                                                                                                                                                                                                                                                                         |
| Manuscript ID                   | bmjopen-2019-031305.R1                                                                                                                                                                                                                                                                                                                                                                                                                                                                                                                                                                                                                                                                                                                                                                  |
| Article Type:                   | Original research                                                                                                                                                                                                                                                                                                                                                                                                                                                                                                                                                                                                                                                                                                                                                                       |
| Date Submitted by the Author:   | 29-Jul-2019                                                                                                                                                                                                                                                                                                                                                                                                                                                                                                                                                                                                                                                                                                                                                                             |
| Complete List of Authors:       | Al Rawashdeh, Nedal ; King Abdullah International Medical Research Center, Research Office; King Hussein Cancer Center, The Office of Scientific Affairs and Research<br>Damsees, Rana ; King Abdullah International Medical Research Center, Research Office; King Hussein Cancer Center, The Office of Scientific Affairs and Research<br>Al-Jeraisy, Majed ; King Abdullah International Medical Research Center, Research Office; King Saud bin Abdulaziz University for Health Sciences Al Qasim, Eman ; King Abdullah International Medical Research Center, Research Office; King Saud bin Abdulaziz University for Health Sciences<br>Deeb, Ahmad; King Abdullah International Medical Research Center, Research Office; King Saud bin Abdulaziz University for Health Sciences |
| <b>Primary Subject Heading</b>: | Public health                                                                                                                                                                                                                                                                                                                                                                                                                                                                                                                                                                                                                                                                                                                                                                           |
| Secondary Subject Heading:      | Public health, Research methods                                                                                                                                                                                                                                                                                                                                                                                                                                                                                                                                                                                                                                                                                                                                                         |
| Keywords:                       | Knowledge, Attitudes, Clinical trials < THERAPEUTICS                                                                                                                                                                                                                                                                                                                                                                                                                                                                                                                                                                                                                                                                                                                                    |
|                                 |                                                                                                                                                                                                                                                                                                                                                                                                                                                                                                                                                                                                                                                                                                                                                                                         |

SCHOLARONE™  
Manuscripts

## Knowledge of and Attitudes toward Clinical Trials in Saudi Arabia: A Cross-sectional study

Nedal Al-Rawashdeh<sup>1,2</sup>, Rana Damsees<sup>1,2</sup>, Majed Al Jeraisy<sup>1</sup>, Eman Al Qasim<sup>1</sup>, Ahmad M. Deeb<sup>1\*</sup>

1. Research Office, King Abdullah International Medical Research Center, Riyadh, Saudi Arabia; King Saud bin Abdulaziz University for Health Sciences, Riyadh Saudi Arabia; Ministry of National Guard Health Affairs, Riyadh, Saudi Arabia.
2. The Office of Scientific Affairs and Research, King Hussein Cancer Center, Amman, Jordan

Nedal Al-Rawashdeh: [rawashdehne@gmail.com](mailto:rawashdehne@gmail.com)

Rana Damsees: [rdamsees@gmail.com](mailto:rdamsees@gmail.com)

Majed Al Jeraisy: [JeraisyM@NGHA.MED.SA](mailto:JeraisyM@NGHA.MED.SA)

Eman Al Qasim: [alqasimem@NGHA.MED.SA](mailto:alqasimem@NGHA.MED.SA)

Ahmad M. Deeb: [rn\\_a\\_deeb@hotmail.com](mailto:rn_a_deeb@hotmail.com)

### \* Corresponding Author

**Ahmad M. Deeb, RN, MSN, CCRC®**

Senior Clinical Research Coordinator  
Research Office  
King Abdullah International Medical Research Center  
King Saud Bin Abdulaziz University for Health Sciences  
King Abdulaziz Medical City  
Ministry of National Guard - Health Affairs  
PO Box 22490, Mail Code 1515  
Riyadh 11426, Kingdom of Saudi Arabia  
Tel. No: +966118011111 ext. 18950  
Monile: +966547883491  
[rn\\_a\\_deeb@hotmail.com](mailto:rn_a_deeb@hotmail.com)

**Short title:** Knowledge & Attitude toward Clinical Trials

## Declarations

### Ethics approval and consent to participate

This study was approved by the Institutional Review Board (IRB) at King Abdulaziz Medical City, Riyadh, KSA.

### Consent for publication

Not applicable

### Availability of data and material

The datasets used and/or analysed during the current study are available from the corresponding author on reasonable request.

### Competing interests

The authors declare no competing interests.

### Funding

This study was supported by research grant RC16/010/R by King Abdullah International Medical Research Center. The study sponsor does not have any role in the study design, management, analysis, interpretation of the data, or in writing the manuscript.

### Author contributions statement



1  
2 Ahmad Deeb and Nedal Al Rawashdeh: Conception and design, data acquisition, data collection,  
3  
4 analytical plan, drafting of the manuscript. Rana Damsees: Conception and design and data  
5  
6 acquisition. Majed Al Jeraisy: Conception and design, data acquisition and supervision. Eman Al  
7  
8 Qasim: Conception and design and data collection. All authors critically revised the manuscript  
9  
10 for important intellectual content, and approved of the final version to be published and agreed  
11  
12 to be accountable for all aspects of the work.  
13  
14  
15

### 16 **Acknowledgements**

17  
18  
19  
20  
21 Not applicable  
22  
23  
24  
25  
26  
27  
28  
29  
30  
31  
32  
33  
34  
35  
36  
37  
38  
39  
40  
41  
42  
43  
44  
45  
46  
47  
48  
49  
50  
51  
52  
53  
54  
55  
56  
57  
58  
59  
60

## Abstract

**Objectives:** Clinical trials (CTs) are considered one of the important methods for developing new treatments and providing access to new potentially effective drugs that are still under investigation. Measuring the public's knowledge of and attitudes toward CTs is important to assessing the public's readiness and acceptance of testing drugs on human participants, which hasn't previously been assessed in the Kingdom of Saudi Arabia (KSA). The objective of this study is to explore the Saudi public's knowledge of and attitudes toward CTs as well as participation in trials to test new or approved drugs.

**Design:** Cross-sectional.

**Setting:** Al Jenadriyah cultural/heritage festival in Riyadh/KSA.

**Participants:** A structured questionnaire was developed and distributed during the 2016 Al Jenadriyah cultural/heritage festival, using a convenience sampling approach. Participating booths, exhibition halls and visitors in the festival were approached to participate in the study. The responses were converted to a percentage mean score (out of 100) for each knowledge related response and attitude.

**Primary and secondary outcome measures:** Knowledge and attitudes toward CTs.

**Results:** The sample realized as 938 (n=938). The total mean knowledge score was  $56.8 \pm 24.8$  and the attitude related score was  $61.5 \pm 28.0$ . Although most of the participants supported testing approved or off-label and new drugs on adult and pediatric patients, only a third 30.5% agreed that new drugs could be tested on healthy volunteers. The results indicated that gender,

1  
2 educational-level, income, medical background, age-group and health insurance were  
3  
4 independent predictors of the level of Knowledge of CTs. In terms of attitudes toward CTs, the  
5  
6 independent predictors were gender, educational-level and medical background.  
7  
8  
9

10 **Conclusion:** The Saudi public has a low level of knowledge and a moderately positive attitude  
11  
12 toward CTs. There is a moderate positive correlation between the two factors as knowledge of  
13  
14 CTs increases, the Saudi public will become more positive toward CTs.  
15  
16  
17  
18  
19  
20

### 21 **Strength and limitations of the study**

22  
23  
24

- 25 • The knowledge and attitudes of the Saudi public toward CTs are under-researched.
- 26  
27 • This is the first study to explore the Saudi public's knowledge and attitudes in terms of the  
28  
29 different phases of CTs in adult and pediatric populations.
- 30  
31 • The main limitation is possible selection bias due to employing a convenience sampling  
32  
33 method.  
34  
35  
36  
37  
38  
39  
40  
41  
42  
43  
44  
45  
46  
47  
48  
49  
50  
51  
52  
53  
54  
55  
56  
57  
58  
59  
60

## Introduction

A clinical trial (CT) is a superior research tool for advancing medical knowledge and practice, as the results are considered to provide the highest level of evidence for medical practice and decision-making.<sup>1</sup> Volunteer participation is at the core of a successful CT. The participation of an adequate number of study participants is crucial in achieving the study's objectives, namely testing the hypothesis and answering the research questions. Failure to recruit an adequate number of participants could result in wasted time, money, and effort.<sup>2</sup> It may also delay the acceptance of the trial results as well as the completion of the drug development process.

Knowledge of and attitudes toward CTs are considered as major challenges for participant recruitment.<sup>3-6</sup> Several studies reported that knowledge of CTs and attitudes toward participation are interrelated<sup>7-11</sup> as increased knowledge promotes a positive attitude toward CT participation. Low recruitment rates for CTs may be improved through increasing the public's knowledge about CTs<sup>6,9,11</sup> and by highlighting the social responsibility perspective of how participation can contribute to the improvement of CTs.<sup>12,13</sup> Improving the public's knowledge of CTs represents an important initial step in improving CT recruitment in the future.<sup>9,12,14</sup>

In the Kingdom of Saudi Arabia (KSA), clinical research has advanced during the last few decades.<sup>15</sup> KSA researchers have contributed to medical literature in conducting different types of research, including investigator-initiated CTs and international multicenter-sponsored CTs.<sup>15</sup> Measuring the knowledge and attitudes of the Saudi public toward CTs is crucial to assess their readiness and acceptance of CTs in Saudi Arabia and to provide an evidence-base to improve CT

1  
2 recruitment and decision-making processes. In addition, it will provide reliable information for  
3  
4 researchers and healthcare leaders for strategic planning of public engagement in CT awareness  
5  
6 campaigns. From the public's perspective, these efforts may be beneficial through increasing  
7  
8 their knowledge and awareness of CTs, improved medical knowledge through updates of CT  
9  
10 results, and sharing of public preferences for future CTs.  
11  
12  
13  
14

15  
16 Several studies have reported the knowledge and attitudes of patients, or families,  
17  
18 toward CTs in health care settings in Saudi Arabia <sup>16-20</sup>; however, studies measuring the  
19  
20 knowledge and attitudes of the Saudi public in general are lacking. The purpose of this study was  
21  
22 to assess the Saudi public's knowledge of and attitudes toward CTs in general and more  
23  
24 specifically, the attitudes toward participation in CTs for drug development.  
25  
26  
27

28  
29 The study addressed the following four questions: What does the Saudi public know about  
30  
31 CTs? What is the attitude of individuals in Saudi Arabia toward CTs and toward participation in  
32  
33 CTs? Is there a correlation between the level of public knowledge and the attitudes of individuals  
34  
35 in Saudi Arabia toward CTs? What factors can be predictive of the levels of public knowledge and  
36  
37 attitudes toward CTs in the Saudi population?  
38  
39  
40

## 41 **Materials and Methods**

### 42 **Setting**

43  
44  
45 This cross-sectional study was conducted between February 2 and February 19, 2016 at  
46  
47 the Al Jenadriyah Cultural and Heritage Festival. The festival takes place in Riyadh and hosts  
48  
49 millions of residents and visitors from the different regions in the country. We selected this event  
50  
51 as it provided us with a unique chance to interview a representative cross-section from all regions  
52  
53  
54  
55  
56  
57  
58  
59  
60

1  
2 of KSA. The study was approved by the Institutional Review Board (IRB) at King Abdulaziz Medical  
3  
4  
5 City, Riyadh, KSA.  
6  
7

## 8 **Study participants**

10  
11 The study included adults of both genders who were willing to participate. A convenience  
12  
13 sampling approach was used. Participating booths and exhibition halls in the festival were  
14  
15 approached and festival visitors were invited to participate in the study. All of the participants  
16  
17 gave informed consent by checking the YES box indicating their willingness to complete the  
18  
19 questionnaire. Participants did not receive any compensation for participation in the study.  
20  
21  
22  
23

## 24 **Patient and public involvement**

26  
27 The public was not included in the development of the research questions or the design  
28  
29 of the study. However, the questionnaire was pre-tested with a different sample of the general  
30  
31 public before implementation.  
32  
33  
34  
35

## 36 **Sample size**

38  
39 The population of KSA is approximately 31,742,308 (Central Department of Statistics and  
40  
41 Information), including 11,677,338 expatriates (Non-Saudi).<sup>21</sup> On the basis of this population  
42  
43 estimate, a 0.05 margin of error, a 95% confidence level, and a response rate of 50%, the  
44  
45 minimum sample size calculated for this study was 385. We increased our sample to 1000 to  
46  
47 reduce the sampling errors and variability between the characteristics of the sample and the  
48  
49 Saudi general population.  
50  
51  
52  
53  
54  
55  
56  
57  
58  
59  
60

## Data collection

A structured questionnaire was developed in Arabic. The questionnaire was divided in three sections: demographic information, knowledge and attitude.

The following variables were included in the demographic information section: gender, age, educational level, monthly income, nationality, residential area, employment status, marital status, health insurance, chronic diseases, medical background (working in a healthcare facility or having health-related education), and previous participation in medical research.

The knowledge section was composed of 12 questions, and the participant's responses were scored as correct (score = 1) or incorrect/not sure (score = 0). The total knowledge score was converted to a percentage mean score with a possible maximum value of 100, a score of 100 indicates perfect knowledge of CTs.

The attitude section was composed of nine direct questions, and participant answers were scored as positive (score = 1) or negative/not sure (score = 0). The total attitude score was converted to a percentage mean score with a possible maximum value of 100, a score of 100 indicates a positive attitude toward CTs.

Based on previous studies, the overall level of knowledge and attitude was classified in three levels following Bloom's cut-off point criteria: above 80% (High level), 60-79% (Moderate level), less than 60% (Low level).<sup>22-24</sup>

We ensured that the language used for the questions was clear and understandable to enable the participants to answer the questions, even if they were not aware of CTs. The

1  
2  
3  
4  
5  
6  
7  
8  
9  
10  
11  
12  
13  
14  
15  
16  
17  
18  
19  
20  
21  
22  
23  
24  
25  
26  
27  
28  
29  
30  
31  
32  
33  
34  
35  
36  
37  
38  
39  
40  
41  
42  
43  
44  
45  
46  
47  
48  
49  
50  
51  
52  
53  
54  
55  
56  
57  
58  
59  
60

questionnaire was validated using content validity. A panel of expert analysts was used to evaluate the questions and they rated each question as essential, useful or irrelevant in the context of measuring knowledge and attitudes. It was pre-tested using a sample of 28 participants. The result of the pre-test was that complex scientific terms were simplified. Reliability was tested by calculating the Cronbach alpha for the pre-test sample for both the knowledge and attitude sections (21 items). The Cronbach alpha score was 0.81.

## Data analysis

The categorical variables are represented as frequency and percentage and the continuous variables as mean  $\pm$  standard deviation (s.d.). Normality was tested by the skewness coefficient, which indicated that the knowledge and attitude data were normally distributed. The Student's *t*-test and one-way analysis of variance (ANOVA) were used as tests of significance. The Pearson correlation coefficient was used to calculate the correlation between the knowledge and attitude scores. A generalized linear model was used to determine the independent predictors of knowledge and attitudes toward CTs. In this models, we controlled for gender, age, education, monthly income, nationality, residency, marital status, employment, health insurance, chronic disease, medical background, previous medical research participation and medical research participation of someone close. All calculations were performed using the Statistical Package for the Social Sciences (version 23; SPSS Inc., Chicago, IL, USA).



## Results

### Participant characteristics

A total of 1,084 members of the public were approached to participate in the study. In total, 938 (86.5%) agreed to complete the questionnaire with one missing value in the gender and nationality variables. Of the 938 participants, males were predominant (61.6%). The age groups with the highest representation were the 18-30 years (54.2%) and 31-40 years (27.6%). The majority of the participants (60.1%) reported achieving a tertiary educational level and 75.7% reported a monthly income of less than 10,000 SAR (Saudi Arabian Riyal) which is equivalent to approximately 2,700 USD (United States Dollar). Approximately half of the participants were single (48.7%), and 22.2% indicated being diagnosed with a chronic disease. Just more than a quarter (27.7%) of the sample had a medical background (working in a healthcare facility or having health-related education). A small group (15.9%) declared that they already participated in medical research, and 26.5% knew someone who participated in medical research in the past (Table 1).

### Knowledge about clinical trials in Saudi Arabia

The overall percentage mean score  $\pm$ SD for knowledge regarding CTs was 56.8  $\pm$ 24.8. Although some participants were not aware of the term 'clinical trial', almost half (43.7%) could define the concept correctly. Most of the participants (71.8%) agreed that CTs are subject to ethical guidelines, but only 26.8% were aware of the concept of an institutional review board (Table 2). The majority (81.1%) was aware of the Saudi Food and Drug Authority (SFDA), and 66.4% were aware of their role in the regulation of CTs. Most of the participants (72.1%) agreed

1  
2 that CTs benefit the community, and 46.5% responded correctly regarding the benefits of CTs for  
3  
4 the study participants. Approximately half of the sample knew the time that investigators can  
5  
6 initiate a CT (56.0%) as well as the right of CT participants to withdraw from (47.6%) from a study.  
7  
8

9  
10 Other findings from the knowledge section of the questionnaire are listed in **Table 2**.

## 11 12 13 **Attitudes toward clinical trials in Saudi Arabia**

14  
15  
16 The overall percentage mean score  $\pm$ SD for Saudi attitudes toward CTs was 61.5  $\pm$ 28.0 out  
17  
18 of a 100 score. Most of the participants (59.5%) had a positive attitude toward testing new drugs  
19  
20 with adult patients in Saudi Arabia, and 63.2% were positive about testing approved/off-label  
21  
22 drugs (approved and marketed drug for other indication) using patients. However, only 30.5% of  
23  
24 the participants were positive about conducting CTs using healthy volunteers (Phase I). The  
25  
26 attitudes were similar for pediatric CTs, as 48.2% and 56.4% agreed with testing new drugs or  
27  
28 approved/off-label drugs on pediatric patients, respectively. The majority of the participants  
29  
30 (72.7%) agreed that CTs were important in terms of drug development, and 69.1% confirmed the  
31  
32 possibility of participating in a CT should the opportunity arise to them or a close family member.  
33  
34  
35  
36 The majority of the participants (86.8%) indicated a willingness to learn more about CTs. Other  
37  
38 findings from the attitude section of the questionnaire are listed in **Table 3**.  
39  
40  
41  
42  
43

## 44 45 **Factors associated with increased knowledge and more positive** 46 47 **attitudes toward clinical trials**

48  
49  
50 The univariate analysis revealed that females had a higher level of knowledge about CTs  
51  
52 than males. In addition, the 31-40 years age group had the highest level of knowledge compared  
53  
54 to other age categories (**Table 1**). Clinical trial related knowledge increased with an increased  
55  
56  
57

1  
2 level of education ( $P=0.001$ ) as well as an increased monthly income ( $P=0.001$ ). Participants from  
3  
4 the Central Region of KSA had a higher level knowledge compared to other regions ( $P=0.001$ )  
5  
6 (**Table 1**). Undergraduate students and governmental employees had a higher level of knowledge  
7  
8 compared to other employment categories ( $P=0.001$ ) (**Table 1**). Having governmental or private  
9  
10 health insurance ( $P=0.001$ ) was associated with a higher level of CT related knowledge.  
11  
12 Noteworthy is that participants without chronic diseases had a higher level of knowledge than  
13  
14 those with chronic diseases ( $P=0.017$ ). Previous participation in medical research or knowing  
15  
16 someone who participated in the past was associated with better CT related knowledge ( $P=0.001$ )  
17  
18  
19  
20  
21  
22 (**Table 1**).

23  
24 After adjusting for possible confounders, males beta coefficients ( $B= -14.1$ ;  $P=0.001$ ),  
25  
26 non-educated participants ( $B= -19.6$ ;  $P=0.001$ ), participants with no income ( $B= -9.7$ ;  $P=0.011$ ),  
27  
28 and no medical background ( $B= -4.7$ ;  $P=0.015$ ) had significantly lower knowledge scores. By  
29  
30 contrast, participants in the 41-60 years age ( $B= 12.1$ ;  $P=0.036$ ) and having health insurance ( $B=$   
31  
32  $12.9$ ;  $P=0.003$ ) were more knowledgeable regarding CTs (**Table 4**).

33  
34  
35  
36  
37  
38  
39 In terms of attitudes, females were more positive toward CTs ( $P= 0.001$ ) than males. The  
40  
41 31-40 years and 41-60 years age groups were more positive compared to other age categories  
42  
43 ( $P=0.007$ ), having a higher educational level is also associated with a more positive attitude  
44  
45 ( $P=0.001$ ) (**Table 1**). As with the knowledge section, undergraduate students and governmental  
46  
47 employees were more positive toward CTs ( $P= 0.028$ ) than participants in other employment  
48  
49 categories (**Table 1**) as well as having governmental or private health insurance ( $P=0.001$ ).  
50  
51 Participants with a medical background or who had previously participated in medical research  
52  
53  
54  
55  
56  
57  
58  
59  
60

1  
2 tended to be more positive ( $P=0.001$ ) compared to participants with no medical background or  
3  
4 who had never participated in medical research (**Table 1**).

5  
6  
7 After adjusting for the possible confounders, being male ( $B= -9.2$ ;  $P=0.001$ ), uneducated  
8  
9 ( $B= -18.4$ ,  $P=0.004$ ), or not having a medical background ( $B= -5.0$ ;  $P=0.039$ ), were associated  
10  
11 with more a negative attitudes toward CTs (**Table 4**).

## 12 13 14 15 16 17 **Correlation between Saudi public's knowledge and attitudes toward** 18 19 20 21 **clinical trials**

22  
23 Our results indicated a moderately positive relationship between the Saudi public's  
24  
25 knowledge and attitudes toward CTs (Pearson's  $r= 0.564$ ,  $P=0.0001$ ). Therefore, we predict that  
26  
27 as knowledge of CTs increases, the Saudi public will become more positive toward CTs.  
28  
29

## 30 31 32 33 **Discussion**

34  
35  
36 This public survey revealed a general lack of knowledge regarding CTs. Most of the  
37  
38 participants could not identify or correctly define the term 'clinical trial'. Although most of the  
39  
40 Saudi public is aware of their right to voluntarily participate in CTs, they were not aware of their  
41  
42 right to withdraw from CTs. The current study is supported with similar findings in studies  
43  
44 conducted in healthcare settings (with patients and/or their families) within Saudi Arabia.<sup>17-20</sup>  
45  
46 The reason may possibly be interpreted as the lack of institutional and national campaigns  
47  
48 promoting CTs.<sup>5,25</sup>  
49  
50  
51  
52  
53  
54  
55  
56  
57  
58  
59  
60

1  
2  
3 Although most of the participants agreed that CTs are controlled by ethical principles,  
4  
5 they were not aware of an IRB and its role in protecting human participants. In a study done in  
6  
7 a healthcare setting, Sheblaq et al. reported that the majority of the patients diagnosed with  
8  
9 cancer was not aware of the role of the IRB.<sup>17</sup> The public tends to trust authorities to protect  
10  
11 them even though they do not know who are responsible for playing this role. We observed this  
12  
13 phenomenon repeatedly when participants answered positively to questions regarding their  
14  
15 trust in the study team and in their compliance with regulatory guidelines when initiating a trial  
16  
17 or recruiting participants. The Saudi public recognized the SFDA and its role in CTs, most likely  
18  
19 due to their well-known food and drug related regulatory activities in Saudi Arabia.  
20  
21  
22  
23

24 The overall level of attitude of the Saudi public toward participation in CTs was  
25  
26 Moderately Positive. The Saudi public agrees that CTs may provide benefits for society as a  
27  
28 whole and the participants. In addition, trust in the study team may explain the favorable  
29  
30 attitude toward participation in CTs. It could be argued that participant responses may change  
31  
32 in real-life situations such as in healthcare settings. However, our results were consistent with  
33  
34 other studies conducted in health care settings in Saudi Arabia investigating the opinions of  
35  
36 patients and families regarding participation in CTs.<sup>16-18</sup>  
37  
38  
39  
40

41 Similarly, but to a lesser degree, the Saudi public agreed with the idea of conducting  
42  
43 pediatric CTs for approved/off-label drugs. However, only 48% of the participants indicated that  
44  
45 it was acceptable to test new drugs in pediatric participants. Objection to the use of new drugs  
46  
47 or vaccines was one of the factors underlying the opposition to pediatric CTs<sup>26</sup>. Although the  
48  
49 study did not explore the reasons underpinning the motivation to participate in CTs, we believe  
50  
51 that the fear of adverse events, as well as safety concerns, may explain this objection.<sup>25,27</sup>  
52  
53  
54  
55  
56  
57  
58  
59  
60

1  
2  
3 Phase I CTs, which involve testing new drugs in healthy volunteers, are important in the  
4  
5 process of drug development. However, several ethical dilemmas influence conducting such  
6  
7 studies with healthy volunteers and patients.<sup>28</sup> In our study, the Saudi public was negative  
8  
9 regarding testing new drugs on healthy volunteers. Only 30.5% of the participants agreed with  
10  
11 the idea of conducting CTs on healthy volunteers in Saudi Arabia. This sentiment may be related  
12  
13 to the lack of knowledge regarding the purpose of testing new drugs on healthy volunteers.  
14  
15 Conducting public educational campaigns about CTs in Saudi Arabia is pivotal to improve their  
16  
17 knowledge and awareness about CTs.  
18  
19  
20  
21

22 Consistent with other studies<sup>9,11</sup>, participants' attitudes toward CTs were markedly  
23  
24 dependent on their knowledge of CTs. We predict that as knowledge about CTs increases, the  
25  
26 Saudi public will become more positive. A low level of knowledge regarding CTs may indicate  
27  
28 misunderstanding or confusion regarding the purposes of the different phases of CTs. In turn,  
29  
30 participants' answers may have been affected by insufficient knowledge. We believe that many  
31  
32 participants used their common sense to answer some survey questions and may have begun  
33  
34 to recognize the meaning of CTs while answering further questions. These observations support  
35  
36 the need for CT related public educational campaigns, since the majority of the participants  
37  
38 were interested to learn more about CTs.  
39  
40  
41  
42  
43

44 Male gender, lower education, lack of a medical background, lower monthly income, a  
45  
46 lower age group, and lack of health insurance were independent predictors of a low level of  
47  
48 knowledge regarding CTs among the Saudi public. Male gender, less education and lack of a  
49  
50 medical background were independent predictors of a negative attitude toward CTs. Our  
51  
52 results are consistent with a United States household survey conducted to assess the level of  
53  
54  
55  
56  
57  
58  
59  
60

1  
2 public participation in and awareness of clinical and translational research, higher levels of  
3  
4 income and education were associated with better participation and awareness.<sup>29</sup> In a study  
5  
6 conducted with patients diagnosed with cancer in a healthcare setting, a lower level of  
7  
8 education and income, as well as race and ethnicity, were associated with decreased awareness  
9  
10 of CTs<sup>9</sup>. Similarly, lower income and education were associated with a reduced willingness to  
11  
12 participate in CTs in African-American patients diagnosed with cancer<sup>30</sup>. A study of patients  
13  
14 with cancer in Saudi Arabia found that higher education was the only significant predictor of  
15  
16 trial participation.<sup>17</sup>

17  
18 Unlike other studies with the public or in healthcare settings<sup>5,9,25,31-33</sup>, gender was an  
19  
20 independent predictor of knowledge and attitudes. Males were associated with a lower level of  
21  
22 knowledge and with a more negative attitude toward CTs. The underlying rationale has not  
23  
24 been clearly discussed in literature. Gender differences regarding knowledge and attitudes  
25  
26 toward CTs should be considered for future studies.

27  
28 In the previous studies investigating knowledge and attitudes toward CTs in Saudi  
29  
30 Arabia, the sample size was much smaller and mainly involved patients and/or their families in  
31  
32 healthcare settings.<sup>17,18</sup> To our knowledge, this is the first study exploring the Saudi public's  
33  
34 knowledge and attitudes toward CTs, external of a healthcare setting. Furthermore, it is the  
35  
36 first study to solicit public perspectives regarding the different phases of CTs conducted in adult  
37  
38 and pediatric populations.

## 39 40 41 42 43 44 45 46 47 48 49 **Conclusion**

50  
51  
52 The Saudi public has a low level of knowledge and moderately positive attitudes toward  
53  
54 CTs. Increasing the Saudi public's knowledge may contribute to positive attitudes toward  
55  
56  
57  
58  
59  
60

1  
2 participation in and support of CTs; supporting our proposition of educational campaigns to  
3  
4 increase awareness and knowledge of CTs. These campaigns should target the less  
5  
6 knowledgeable sub-groups identified in the study and focus on the importance of evaluating  
7  
8 new drugs on healthy volunteers (Phase I clinical trials). In addition, our results support  
9  
10 conducting and investing in CTs in KSA. Conducting similar studies in the future, taking the  
11  
12 limitations of this study in consideration, may facilitate measuring the improvement of  
13  
14 knowledge over time. We also recommend in-depth qualitative and focus-group-based studies  
15  
16 for a deeper understanding of participant perspectives.  
17  
18  
19  
20  
21

## 22 **Study limitations**

23  
24  
25 The main limitation in this study is related to possible selection bias due to using a  
26  
27 convenient sampling method; however the effect of the limitation may have been minimized by  
28  
29 the large sample size and the diversity of the visitors. For example, in our sample the  
30  
31 distribution of male gender 61.6% was slightly larger than in general population while in the age  
32  
33 group 31 to 40 it was 27.6% which is slightly lower.  
34  
35  
36  
37  
38  
39  
40  
41  
42  
43  
44  
45  
46  
47  
48  
49  
50  
51  
52  
53  
54  
55  
56  
57  
58  
59  
60



## Abbreviations

ANOVA: Analysis of variance

CTs: Clinical Trials

IRB: Institutional review board

KSA: Kingdom of Saudi Arabia

SAR: Saudi Arabian Riyal

S.D: Standard Deviation

SFDA: Saudi Food and Drug Authority

USD: United States Dollar

## References

1. Oxford Centre for Evidence-based Medicine – Levels of Evidence. 2009. 2017, at [http://www.cebm.net/oxford-centre-evidence-based-medicine-levels-evidence-march-2009/.](http://www.cebm.net/oxford-centre-evidence-based-medicine-levels-evidence-march-2009/))
2. Wyse RK. Accelerating patient recruitment in clinical trials: in-depth report from the SMi 2nd annual conference In: Ross C, editor. The SMi 2nd annual conference 2006; London: NetworkPharma Ltd.
3. Verheggen FW, Nieman FH, Reerink E, Kok GJ. Patient satisfaction with clinical trial participation. *Int J Qual Health Care* 1998;10:319-30.
4. Public Engagement and Clinical Trials: New Models and Disruptive Technologies: Workshop Summary. Washington (DC)2012.
5. Leiter A, Diefenbach MA, Doucette J, Oh WK, Galsky MD. Clinical trial awareness: Changes over time and sociodemographic disparities. *Clin Trials* 2015;12:215-23.
6. The Need for Awareness of Clinical Research. National Institute of Health, 2016. 2017, at <https://www.nih.gov/health-information/nih-clinical-research-trials-you/need-awareness-clinical-research.>)
7. Kim SH, Tanner A, Friedman DB, Foster C, Bergeron C. Barriers to Clinical Trial Participation: Comparing Perceptions and Knowledge of African American and White South Carolinians. *J Health Commun* 2015;20:816-26.
8. Kim SH, Tanner A, Friedman DB, Foster C, Bergeron CD. Barriers to clinical trial participation: a comparison of rural and urban communities in South Carolina. *J Community Health* 2014;39:562-71.
9. Lara PN, Jr., Paterniti DA, Chiechi C, et al. Evaluation of factors affecting awareness of and willingness to participate in cancer clinical trials. *J Clin Oncol* 2005;23:9282-9.
10. Joshi V, Kulkarni AA. Public awareness of clinical trials: A qualitative pilot study in Pune. *Perspect Clin Res* 2012;3:125-32.
11. Miller S, Hudson S, Egleston B, et al. The relationships among knowledge, self-efficacy, preparedness, decisional conflict and decisions to participate in a cancer clinical trial. *Psychooncology* 2013;22: 481–9.
12. Denicoff AM, McCaskill-Stevens W, Grubbs SS, et al. The National Cancer Institute-American Society of Clinical Oncology Cancer Trial Accrual Symposium: summary and recommendations. *J Oncol Pract* 2013;9:267-76.
13. Trantham LC, Carpenter WR, DiMartino LD, et al. Perceptions of Cancer Clinical Research Among African American Men in North Carolina. *J Natl Med Assoc* 2015;107:33-41.
14. Featherstone K, Donovan JL. "Why don't they just tell me straight, why allocate it?" The struggle to make sense of participating in a randomised controlled trial. *Soc Sci Med* 2002;55:709-19.
15. Jamjoom AB, Jamjoom AM, Samman AM, Gahtani AY. Fate of registered clinical trials performed in Saudi Arabia. *Saudi Med J* 2015;36:1245-8.
16. Bazarbashi S, Hassan A, Eldin AM, Soudy H, Hussain F. Awareness and Perceptions of Clinical Trials in Cancer Patients and Their Families in Saudi Arabia. *J Cancer Educ* 2015;30:655-9.
17. Sheblaq NR, Traifi S, Sakiani MA, Gasmelseed A, Abolfotouh MA, Jazieh AR. Awareness and attitude of cancer patients about participation in clinical research (CR) in Saudi Arabia. *J Clin Oncol* 2013;(suppl; abstr e17528).
18. Al-Tannir MA, El-Bakri N, Abu-Shaheen AK. Knowledge, Attitudes and Perceptions of Saudis towards Participating in Clinical Trials. *PLoS One* 2016;11:e0143893.
19. Al-Dakhil LO, Alanazy R, Al-Hamed RE, Al-Mandeel H, Alobaid A. Attitudes of Patients in Developing Countries Toward Participating in Clinical Trials: A Survey of Saudi Patients Attending Primary Health Care Services. *Oman Med J* 2016;31:284-9.

- 1  
2  
3  
4  
5  
6  
7  
8  
9  
10  
11  
12  
13  
14  
15  
16  
17  
18  
19  
20  
21  
22  
23  
24  
25  
26  
27  
28  
29  
30  
31  
32  
33  
34  
35  
36  
37  
38  
39  
40  
41  
42  
43  
44  
45  
46  
47  
48  
49  
50  
51  
52  
53  
54  
55  
56  
57  
58  
59  
60
20. Almutairi KM, Alonazi WB, Alodhayani AA, et al. Barriers to Cancer Clinical Trial Participation Among Saudi Nationals: A Cross-Sectional Study. *J Relig Health* 2017;56:623-34.
  21. The Central Department of Statistics and Information 2016. (Accessed 24/04/2017, 2017, at [https://www.stats.gov.sa/sites/default/files/en-demographic-research-2016\\_4.pdf](https://www.stats.gov.sa/sites/default/files/en-demographic-research-2016_4.pdf).)
  22. Abdullahi A, Hassan A, Kadarman N, Saleh A, Baraya YuSa, Lua PL. Food safety knowledge, attitude, and practice toward compliance with abattoir laws among the abattoir workers in Malaysia. *International journal of general medicine* 2016;9:79-87.
  23. Nur Ain M, Azfar M, Omarulharis S, et al. Knowledge, Attitude And Practice Of Dengue Prevention Among Sub Urban Community In Sepang, Selangor. *International Journal of Public Health and Clinical Sciences* 2017;4:73-83.
  24. Malhotra V, Kaura S, Sharma H. Knowledge, attitude and practices about hepatitis B and Infection Control Measures among dental students in Patiala. *Journal of Dental and Allied Sciences* 2017;6:65-9.
  25. Choi YJ, Beck SH, Kang WY, et al. Knowledge and Perception about Clinical Research Shapes Behavior: Face to Face Survey in Korean General Public. *J Korean Med Sci* 2016;31:674-81.
  26. Nasef N, Shabaan A, Mohammed S, et al. Factors influencing parental consent for participation in clinical research involving their children in Egypt. *East Mediterr Health J* 2014;20:162-8.
  27. Nabulsi M, Khalil Y, Makhoul J. Parental attitudes towards and perceptions of their children's participation in clinical research: a developing-country perspective. *J Med Ethics* 2011;37:420-3.
  28. Elliott C, Abadie R. Exploiting a research underclass in phase 1 clinical trials. *N Engl J Med* 2008;358:2316-7.
  29. Davis MM, Clark SJ, Butchart AT, Singer DC, Shanley TP, Gipson DS. Public participation in, and awareness about, medical research opportunities in the era of clinical and translational research. *Clin Transl Sci* 2013;6:88-93.
  30. Advani AS, Atkeson B, Brown CL, et al. Barriers to the participation of African-American patients with cancer in clinical trials: a pilot study. *Cancer* 2003;97:1499-506.
  31. Comis RL, Miller JD, Aldige CR, Krebs L, Stoval E. Public attitudes toward participation in cancer clinical trials. *J Clin Oncol* 2003;21:830-5.
  32. Joshi VD, Oka GA, Kulkarni AA, Bivalkar VV. Public awareness and perception of clinical trials: Quantitative study in Pune. *Perspect Clin Res* 2013;4:169-74.
  33. Ohmann C, Deimling A. Attitude towards clinical trials: results of a survey of persons interested in research. *Inflamm Res* 2004;53 Suppl 2:S142-7.

Table 1. Participant characteristics and the unadjusted prectors for knowledge and attitudes

| Characteristics                                                | Group                                           | Overall<br>N = 938 |      | Knowledge<br>Overall mean = 56.8 ±<br>24.8 |      |        | Attitudes<br>Overall mean = 61.5 ±<br>28.0 |      |        |
|----------------------------------------------------------------|-------------------------------------------------|--------------------|------|--------------------------------------------|------|--------|--------------------------------------------|------|--------|
|                                                                |                                                 | N                  | %    | Mean                                       | s.d. | P      | Mean                                       | s.d. | P      |
| Gender                                                         | Male                                            | 577                | 61.6 | 51.37                                      | 24.4 | 0.001* | 57.40                                      | 28.0 | 0.001* |
|                                                                | Female                                          | 360                | 38.4 | 65.62                                      | 22.9 |        | 67.90                                      | 26.8 |        |
| Age                                                            | 18–30                                           | 508                | 54.2 | 55.45                                      | 26.0 | 0.001* | 59.36                                      | 28.2 | 0.007* |
|                                                                | 31–40                                           | 259                | 27.6 | 60.07                                      | 23.2 |        | 63.28                                      | 27.8 |        |
|                                                                | 41–60                                           | 153                | 16.3 | 58.17                                      | 22.0 |        | 66.67                                      | 26.0 |        |
|                                                                | 61+                                             | 18                 | 1.9  | 37.50                                      | 22.7 |        | 50.62                                      | 34.1 |        |
| Education                                                      | Not educated                                    | 27                 | 2.9  | 35.19                                      | 18.0 | 0.001* | 46.09                                      | 29.8 | 0.001* |
|                                                                | High school or less                             | 347                | 37.0 | 48.37                                      | 22.7 |        | 57.25                                      | 28.0 |        |
|                                                                | University, college or more                     | 563                | 60.1 | 63.06                                      | 24.2 |        | 64.81                                      | 27.3 |        |
| Monthly income                                                 | • No income                                     | 195                | 20.8 | 49.62                                      | 22.7 | 0.001* | 57.78                                      | 28.5 | 0.084  |
|                                                                | • Less than 5,000 SAR<br>• Less than 1,300 USD  | 280                | 29.9 | 56.13                                      | 26.1 |        | 62.02                                      | 27.2 |        |
|                                                                | • 5,001 to 10,000 SAR<br>• 1,301 to 2,700 USD   | 234                | 25.0 | 56.73                                      | 23.0 |        | 60.64                                      | 28.2 |        |
|                                                                | • SAR 10,001 to 15,000<br>• USD 2,701 to 4,000  | 148                | 15.8 | 61.43                                      | 24.2 |        | 63.74                                      | 28.0 |        |
|                                                                | • More than 15,000 SAR<br>• More than 4,000 USD | 79                 | 8.5  | 68.88                                      | 25.3 |        | 67.37                                      | 27.9 |        |
|                                                                |                                                 |                    |      |                                            |      |        |                                            |      |        |
| Nationality                                                    | Saudi                                           | 817                | 87.3 | 57.27                                      | 24.6 | 0.143  | 62.10                                      | 27.7 | 0.095  |
|                                                                | Non-Saudi                                       | 119                | 12.7 | 53.71                                      | 25.8 |        | 57.52                                      | 29.4 |        |
| Residency                                                      | Central region                                  | 707                | 75.4 | 59.21                                      | 24.4 | 0.001* | 62.93                                      | 28.5 | 0.055  |
|                                                                | Western region                                  | 86                 | 9.2  | 52.52                                      | 27.6 |        | 59.04                                      | 28.3 |        |
|                                                                | Northern region                                 | 59                 | 6.3  | 46.19                                      | 25.0 |        | 53.48                                      | 25.1 |        |
|                                                                | Southern region                                 | 60                 | 6.4  | 49.31                                      | 20.7 |        | 57.04                                      | 22.5 |        |
|                                                                | Eastern region                                  | 26                 | 2.8  | 47.76                                      | 21.3 |        | 58.12                                      | 26.9 |        |
| Marital Status                                                 | Single                                          | 455                | 48.7 | 56.06                                      | 26.7 | 0.549  | 60.59                                      | 28.3 | 0.130  |
|                                                                | Married                                         | 444                | 47.5 | 57.04                                      | 22.8 |        | 61.61                                      | 27.5 |        |
|                                                                | Other                                           | 35                 | 3.8  | 60.48                                      | 22.1 |        | 70.48                                      | 28.8 |        |
| Employment                                                     | Student in school                               | 78                 | 8.3  | 47.54                                      | 24.0 | 0.001* | 56.13                                      | 27.4 | 0.028* |
|                                                                | Undergraduate student/<br>university or college | 166                | 17.8 | 63.15                                      | 26.0 |        | 65.66                                      | 25.6 |        |
|                                                                | Government sector                               | 235                | 25.0 | 61.70                                      | 24.1 |        | 64.68                                      | 28.1 |        |
|                                                                | Private sector                                  | 208                | 22.2 | 56.29                                      | 25.4 |        | 59.56                                      | 28.0 |        |
|                                                                | Military                                        | 54                 | 5.7  | 52.16                                      | 23.2 |        | 55.76                                      | 30.6 |        |
|                                                                | Private work/owner                              | 61                 | 6.8  | 50.68                                      | 22.5 |        | 56.65                                      | 31.1 |        |
|                                                                | Retired                                         | 26                 | 2.7  | 51.92                                      | 21.9 |        | 65.38                                      | 31.5 |        |
|                                                                | Not working                                     | 62                 | 6.6  | 44.49                                      | 21.7 |        | 57.17                                      | 26.3 |        |
|                                                                | Housewife                                       | 47                 | 4.9  | 59.22                                      | 18.9 |        | 64.30                                      | 26.2 |        |
| Health insurance                                               | Governmental                                    | 560                | 59.7 | 58.23                                      | 25.2 | 0.001* | 64.09                                      | 27.4 | 0.001* |
|                                                                | Private                                         | 116                | 12.4 | 58.41                                      | 25.0 |        | 58.43                                      | 30.1 |        |
|                                                                | Other                                           | 226                | 24.1 | 55.20                                      | 22.5 |        | 58.46                                      | 27.4 |        |
|                                                                | No insurance                                    | 36                 | 3.8  | 40.05                                      | 24.9 |        | 49.38                                      | 28.8 |        |
| Chronic disease                                                | Yes                                             | 208                | 22.2 | 53.21                                      | 23.7 | 0.017* | 59.19                                      | 27.7 | 0.183  |
|                                                                | No                                              | 730                | 77.8 | 57.85                                      | 25.0 |        | 62.12                                      | 28.0 |        |
| Medical background                                             | Yes                                             | 259                | 27.7 | 65.99                                      | 26.6 | 0.001* | 67.35                                      | 27.5 | 0.001* |
|                                                                | No                                              | 677                | 72.3 | 53.37                                      | 23.1 |        | 59.23                                      | 27.9 |        |
| Previous medical research participation                        | Yes                                             | 149                | 15.9 | 65.83                                      | 25.8 | 0.001* | 66.44                                      | 27.6 | 0.001* |
|                                                                | Was requested, but didn't participate           | 11                 | 1.1  | 50.00                                      | 22.4 |        | 63.64                                      | 27.3 |        |
|                                                                | No                                              | 737                | 78.6 | 55.54                                      | 24.3 |        | 60.65                                      | 28.1 |        |
|                                                                | Not sure                                        | 41                 | 4.4  | 48.98                                      | 22.3 |        | 57.45                                      | 26.0 |        |
| Do you know somebody who has participated in medical research? | Yes                                             | 248                | 26.5 | 60.42                                      | 24.6 | 0.001* | 62.23                                      | 27.6 | 0.100  |
|                                                                | No                                              | 596                | 63.6 | 57.30                                      | 24.6 |        | 62.99                                      | 27.8 |        |
|                                                                | Not sure                                        | 93                 | 9.9  | 44.18                                      | 23.1 |        | 49.46                                      | 27.7 |        |

\* Significant at  $\alpha = 0.05$ .

**Table 2. Participant knowledge related responses**

| <b>Variables</b>                                                                      | <b>N (% of participants)</b> |
|---------------------------------------------------------------------------------------|------------------------------|
| <b>Have you heard about clinical trials before?</b>                                   |                              |
| Yes                                                                                   | 289 (30.8)                   |
| No/not sure                                                                           | 648 (69.1)                   |
| <b>What is the definition of a clinical trial?</b>                                    |                              |
| Studies in clinics to survey patients opinion about health care topics                | 139 (14.8)                   |
| Experiments on animals                                                                | 119 (12.7)                   |
| Studies to test new drugs or procedure on humans                                      | 410 (43.7)                   |
| Graduation projects for medical students                                              | 62 (6.6)                     |
| Not sure                                                                              | 208 (22.2)                   |
| <b>Have you heard about an IRB before?</b>                                            |                              |
| Yes                                                                                   | 251 (26.8)                   |
| No                                                                                    | 685 (73.1)                   |
| <b>Have you heard of the SFDA before?</b>                                             |                              |
| Yes                                                                                   | 761 (81.1)                   |
| No                                                                                    | 177 (18.9)                   |
| <b>Does the SFDA have a role in regulating clinical trials?</b>                       |                              |
| Yes                                                                                   | 622 (66.4)                   |
| No                                                                                    | 315 (33.6)                   |
| <b>Is there an ethical guidelines to regulate the conduction of clinical trials?</b>  |                              |
| Yes                                                                                   | 673 (71.8)                   |
| No                                                                                    | 265 (28.3)                   |
| <b>Are there a direct benefits for participants to conduct Clinical Trials?</b>       |                              |
| Definitely                                                                            | 313 (33.4)                   |
| Definitely not                                                                        | 35 (3.7)                     |
| No benefit or harm                                                                    | 19 (2.0)                     |
| Possible benefit or harm                                                              | 436 (46.5)                   |
| Not sure                                                                              | 135 (14.4)                   |
| <b>Are there a direct benefits for community to conduct Clinical Trials?</b>          |                              |
| Yes                                                                                   | 676 (72.1)                   |
| No                                                                                    | 262 (27.9)                   |
| <b>When can an investigator start clinical trials?</b>                                |                              |
| Any time they want                                                                    | 42 (4.5)                     |
| Only with participant agreement                                                       | 135 (14.4)                   |
| After obtaining manager approval                                                      | 41 (4.4)                     |
| They should obtain approvals from responsible authorities                             | 525 (56.0)                   |
| Not sure                                                                              | 195 (20.8)                   |
| <b>Can an investigator recruit patients without their approval?</b>                   |                              |
| Yes                                                                                   | 250 (26.7)                   |
| No                                                                                    | 687 (73.3)                   |
| <b>Can participants freely withdraw from clinical trials anytime?</b>                 |                              |
| Yes                                                                                   | 446 (47.6)                   |
| No                                                                                    | 492 (52.5)                   |
| <b>May published articles include confidential patient information (e.g., names)?</b> |                              |
| Yes                                                                                   | 318 (33.9)                   |
| No                                                                                    | 620 (66.1)                   |
| <b>Knowledge score out of 100 (12 questions)</b>                                      | <b>56.8 ± 24.8</b>           |

IRB: Institutional Review Board; SFDA: Saudi Food Drug Authority

**Table 3. Participants' attitude related responses**

| <b>Variables</b>                                                                              | <b>n (%)</b>       |
|-----------------------------------------------------------------------------------------------|--------------------|
| <b>Do you agree with testing new drugs in patients?</b>                                       |                    |
| Yes                                                                                           | 558 (59.5)         |
| No/not sure                                                                                   | 380 (40.5)         |
| <b>Do you agree with testing approved drugs in patients?</b>                                  |                    |
| Yes                                                                                           | 593 (63.2)         |
| No/not sure                                                                                   | 345 (36.8)         |
| <b>Do you agree with testing new drugs in healthy volunteers?</b>                             |                    |
| Yes                                                                                           | 286 (30.5)         |
| No/not sure                                                                                   | 651 (69.5)         |
| <b>Do you agree with testing new drugs in pediatric patients?</b>                             |                    |
| Yes                                                                                           | 452 (48.2)         |
| No/not sure                                                                                   | 485 (51.8)         |
| <b>Do you agree with testing approved drugs in pediatric patients?</b>                        |                    |
| Yes                                                                                           | 528 (56.4)         |
| No/not sure                                                                                   | 409 (43.7)         |
| <b>Do you agree with participating/having a family member participate in clinical trials?</b> |                    |
| Yes                                                                                           | 252 (26.9)         |
| Possibly                                                                                      | 395 (42.2)         |
| No/not sure                                                                                   | 290 (31.0)         |
| <b>What is your perception regarding clinical trials?</b>                                     |                    |
| Not important                                                                                 | 41 (4.4)           |
| Very important for drug development                                                           | 682 (72.7)         |
| Important only for pharmaceutical companies to earn money                                     | 54 (5.8)           |
| Not sure                                                                                      | 161 (17.2)         |
| <b>Are you willing to learn about clinical trials?</b>                                        |                    |
| Yes                                                                                           | 814 (86.8)         |
| No                                                                                            | 124 (13.2)         |
| <b>Do you trust research teams?</b>                                                           |                    |
| Yes                                                                                           | 629 (67.1)         |
| No/not sure                                                                                   | 309 (32.9)         |
| <b>Attitude score out of 100 (9 questions)</b>                                                | <b>61.5 ± 28.0</b> |

Table 4. Independent predictors of the Saudi public's knowledge and attitudes toward clinical trials

| Characteristics                                                     | Knowledge |             |        |        | Attitudes |             |       |        |
|---------------------------------------------------------------------|-----------|-------------|--------|--------|-----------|-------------|-------|--------|
|                                                                     | B         | 95% Wald CI |        | P      | B         | 95% Wald CI |       | P      |
| (Intercept)                                                         | 48.2      | 26.83       | 69.48  | 0.001* | 57.4      | 30.72       | 84.01 | 0.001* |
| Gender (reference: female)                                          |           |             |        |        |           |             |       |        |
| <i>Male</i>                                                         | -14.1     | -17.49      | -10.65 | 0.001* | -9.2      | -13.42      | -4.88 | 0.001* |
| Age (reference: 61+)                                                |           |             |        |        |           |             |       |        |
| <i>18-30</i>                                                        | 9.2       | -2.86       | 21.31  | 0.135  | -0.8      | -15.87      | 14.33 | 0.920  |
| <i>31-40</i>                                                        | 11.2      | -0.56       | 22.92  | 0.062  | 3.7       | -10.98      | 18.34 | 0.623  |
| <i>41-60</i>                                                        | 12.1      | 0.80        | 23.44  | 0.036* | 10.6      | -3.55       | 24.73 | 0.142  |
| Education (reference: University, college or more)                  |           |             |        |        |           |             |       |        |
| <i>Not educated</i>                                                 | -19.6     | -29.64      | -9.66  | 0.001* | -18.4     | -30.88      | -5.92 | 0.004* |
| <i>High school or less</i>                                          | -8.2      | -12.10      | -4.37  | 0.001* | -5.1      | -9.94       | -0.29 | 0.038* |
| Monthly income (reference: SR 15,000 or more)                       |           |             |        |        |           |             |       |        |
| <i>No income</i>                                                    | -9.7      | -17.17      | -2.19  | 0.011* | -1.0      | -10.38      | 8.34  | 0.831  |
| <i>SR 5,000 or less</i>                                             | -9.1      | -15.48      | -2.79  | 0.005* | 0.4       | -7.50       | 8.35  | 0.916  |
| <i>SR 6,000 to SR 10,000</i>                                        | -6.9      | -12.71      | -1.00  | 0.022* | 0.0       | -7.36       | 7.28  | 0.992  |
| <i>SR 11,000 to SR 15,000</i>                                       | -3.6      | -9.65       | 2.38   | 0.236  | 1.2       | -6.28       | 8.73  | 0.749  |
| Nationality (reference: non-Saudi)                                  |           |             |        |        |           |             |       |        |
| <i>Saudi</i>                                                        | -1.6      | -6.80       | 3.63   | 0.552  | 1.0       | -5.52       | 7.51  | 0.764  |
| Residency (reference: Eastern region)                               |           |             |        |        |           |             |       |        |
| <i>Central region</i>                                               | 3.6       | -4.94       | 12.05  | 0.412  | -0.5      | -11.14      | 10.08 | 0.922  |
| <i>Western region</i>                                               | 1.9       | -7.60       | 11.39  | 0.696  | -0.9      | -12.73      | 11.00 | 0.886  |
| <i>Northern region</i>                                              | -10.8     | -20.77      | -0.76  | 0.035* | -12.7     | -25.19      | -0.20 | 0.046* |
| <i>Southern region</i>                                              | -1.1      | -10.89      | 8.76   | 0.832  | -5.3      | -17.61      | 6.93  | 0.393  |
| Marital Status (reference: other)                                   |           |             |        |        |           |             |       |        |
| <i>Single</i>                                                       | 1.4       | -6.94       | 9.81   | 0.736  | -3.1      | -13.55      | 7.37  | 0.563  |
| <i>Married</i>                                                      | 0.9       | -6.80       | 8.67   | 0.813  | -4.5      | -14.17      | 5.15  | 0.360  |
| Employment (reference: housewife)                                   |           |             |        |        |           |             |       |        |
| <i>Student</i>                                                      | -5.1      | -14.08      | 3.97   | 0.272  | 2.1       | -9.21       | 13.34 | 0.719  |
| <i>Undergraduate student</i>                                        | 0.2       | -8.60       | 8.99   | 0.965  | 3.7       | -7.26       | 14.71 | 0.506  |
| <i>Government sector</i>                                            | -3.0      | -11.56      | 5.55   | 0.491  | 1.0       | -9.70       | 11.67 | 0.857  |
| <i>Private sector</i>                                               | -5.1      | -13.65      | 3.51   | 0.247  | -1.0      | -11.75      | 9.69  | 0.850  |
| <i>Military</i>                                                     | -10.3     | -20.56      | -0.03  | 0.049* | -0.9      | -13.75      | 11.89 | 0.887  |
| <i>Private work</i>                                                 | -6.4      | -15.54      | 2.72   | 0.169  | -2.8      | -14.18      | 8.64  | 0.634  |
| <i>Retired</i>                                                      | -0.3      | -11.73      | 11.19  | 0.963  | 8.5       | -5.86       | 22.76 | 0.247  |
| <i>Not working</i>                                                  | -5.2      | -14.01      | 3.53   | 0.241  | 3.5       | -7.45       | 14.45 | 0.531  |
| Health insurance (reference: no insurance)                          |           |             |        |        |           |             |       |        |
| <i>Governmental</i>                                                 | 12.9      | 4.48        | 21.33  | 0.003* | 10.1      | -0.45       | 20.60 | 0.061  |
| <i>Private</i>                                                      | 16.5      | 7.06        | 25.95  | 0.001* | 4.4       | -7.42       | 16.18 | 0.467  |
| <i>Other</i>                                                        | 12.8      | 4.49        | 21.08  | 0.003* | 7.9       | -2.50       | 18.22 | 0.137  |
| Chronic diseases (reference: yes)                                   |           |             |        |        |           |             |       |        |
| <i>No</i>                                                           | -2.2      | -5.75       | 1.27   | 0.211  | -3.5      | -7.91       | 0.87  | 0.116  |
| Medical background (reference: yes)                                 |           |             |        |        |           |             |       |        |
| <i>No</i>                                                           | -4.7      | -8.47       | -0.90  | 0.015* | -5.0      | -9.70       | -0.24 | 0.039* |
| Participated in medical research (reference: no)                    |           |             |        |        |           |             |       |        |
| <i>Yes</i>                                                          | 6.0       | -1.78       | 13.77  | 0.131  | 1.7       | -8.04       | 11.38 | 0.736  |
| Knows somebody who participated in medical research (reference: no) |           |             |        |        |           |             |       |        |
| <i>Yes</i>                                                          | 12.3      | 7.07        | 17.55  | 0.001* | 10.4      | 3.88        | 16.97 | 0.002* |

\*Significant at  $\alpha = 0.05$ . CI, confidence interval.



STROBE Statement—Checklist of items that should be included in reports of *cross-sectional studies*

|                              | Item No                                                                            | Recommendation                                                                                                                                                                                    | Page No |
|------------------------------|------------------------------------------------------------------------------------|---------------------------------------------------------------------------------------------------------------------------------------------------------------------------------------------------|---------|
| <b>Title and abstract</b>    | 1                                                                                  | (a) Indicate the study's design with a commonly used term in the title or the abstract                                                                                                            | 1, 4    |
|                              |                                                                                    | (b) Provide in the abstract an informative and balanced summary of what was done and what was found                                                                                               | 4       |
| <b>Introduction</b>          |                                                                                    |                                                                                                                                                                                                   |         |
| Background/rationale         | 2                                                                                  | Explain the scientific background and rationale for the investigation being reported                                                                                                              | 6       |
| Objectives                   | 3                                                                                  | State specific objectives, including any prespecified hypotheses                                                                                                                                  | 7       |
| <b>Methods</b>               |                                                                                    |                                                                                                                                                                                                   |         |
| Study design                 | 4                                                                                  | Present key elements of study design early in the paper                                                                                                                                           | 7       |
| Setting                      | 5                                                                                  | Describe the setting, locations, and relevant dates, including periods of recruitment, exposure, follow-up, and data collection                                                                   | 7       |
| Participants                 | 6                                                                                  | (a) Give the eligibility criteria, and the sources and methods of selection of participants                                                                                                       | 8       |
| Variables                    | 7                                                                                  | Clearly define all outcomes, exposures, predictors, potential confounders, and effect modifiers. Give diagnostic criteria, if applicable                                                          | 9       |
| Data sources/<br>measurement | 8*                                                                                 | For each variable of interest, give sources of data and details of methods of assessment (measurement). Describe comparability of assessment methods if there is more than one group              | 9       |
| Bias                         | 9                                                                                  | Describe any efforts to address potential sources of bias                                                                                                                                         | 8,9,10  |
| Study size                   | 10                                                                                 | Explain how the study size was arrived at                                                                                                                                                         | 8       |
| Quantitative variables       | 11                                                                                 | Explain how quantitative variables were handled in the analyses. If applicable, describe which groupings were chosen and why                                                                      | 9,10    |
| Statistical methods          | 12                                                                                 | (a) Describe all statistical methods, including those used to control for confounding                                                                                                             | 10      |
|                              |                                                                                    | (b) Describe any methods used to examine subgroups and interactions                                                                                                                               | 10      |
|                              | (c) Explain how missing data were addressed                                        |                                                                                                                                                                                                   |         |
|                              | (d) If applicable, describe analytical methods taking account of sampling strategy | 8                                                                                                                                                                                                 |         |
|                              | (e) Describe any sensitivity analyses                                              |                                                                                                                                                                                                   |         |
| <b>Results</b>               |                                                                                    |                                                                                                                                                                                                   |         |
| Participants                 | 13*                                                                                | (a) Report numbers of individuals at each stage of study—eg numbers potentially eligible, examined for eligibility, confirmed eligible, included in the study, completing follow-up, and analysed | 11      |
|                              |                                                                                    | (b) Give reasons for non-participation at each stage                                                                                                                                              | 11      |
|                              |                                                                                    | (c) Consider use of a flow diagram                                                                                                                                                                |         |
| Descriptive data             | 14*                                                                                | (a) Give characteristics of study participants (eg demographic, clinical, social) and information on exposures and potential confounders                                                          | 11, 22  |
|                              |                                                                                    | (b) Indicate number of participants with missing data for each variable of interest                                                                                                               |         |



|                          |     |                                                                                                                                                                                                              |                    |
|--------------------------|-----|--------------------------------------------------------------------------------------------------------------------------------------------------------------------------------------------------------------|--------------------|
| Outcome data             | 15* | Report numbers of outcome events or summary measures                                                                                                                                                         | 11,12,22-25        |
| Main results             | 16  | (a) Give unadjusted estimates and, if applicable, confounder-adjusted estimates and their precision (eg, 95% confidence interval). Make clear which confounders were adjusted for and why they were included | 10, 11, 12, 22, 25 |
|                          |     | (b) Report category boundaries when continuous variables were categorized                                                                                                                                    | 11, 22, 25         |
|                          |     | (c) If relevant, consider translating estimates of relative risk into absolute risk for a meaningful time period                                                                                             |                    |
| Other analyses           | 17  | Report other analyses done—eg analyses of subgroups and interactions, and sensitivity analyses                                                                                                               | 14                 |
| <b>Discussion</b>        |     |                                                                                                                                                                                                              |                    |
| Key results              | 18  | Summarise key results with reference to study objectives                                                                                                                                                     | 14                 |
| Limitations              | 19  | Discuss limitations of the study, taking into account sources of potential bias or imprecision. Discuss both direction and magnitude of any potential bias                                                   | 18                 |
| Interpretation           | 20  | Give a cautious overall interpretation of results considering objectives, limitations, multiplicity of analyses, results from similar studies, and other relevant evidence                                   | 14-18              |
| Generalisability         | 21  | Discuss the generalisability (external validity) of the study results                                                                                                                                        | 18                 |
| <b>Other information</b> |     |                                                                                                                                                                                                              |                    |
| Funding                  | 22  | Give the source of funding and the role of the funders for the present study and, if applicable, for the original study on which the present article is based                                                | 2                  |

\*Give information separately for exposed and unexposed groups.

**Note:** An Explanation and Elaboration article discusses each checklist item and gives methodological background and published examples of transparent reporting. The STROBE checklist is best used in conjunction with this article (freely available on the Web sites of PLoS Medicine at <http://www.plosmedicine.org/>, Annals of Internal Medicine at <http://www.annals.org/>, and Epidemiology at <http://www.epidem.com/>). Information on the STROBE Initiative is available at [www.strobe-statement.org](http://www.strobe-statement.org).

# BMJ Open

## Knowledge of and Attitudes toward Clinical Trials in Saudi Arabia: A Cross-sectional study

|                                 |                                                                                                                                                                                                                                                                                                                                                                                                                                                                                                                                                                                                                                                                                                                                                                                         |
|---------------------------------|-----------------------------------------------------------------------------------------------------------------------------------------------------------------------------------------------------------------------------------------------------------------------------------------------------------------------------------------------------------------------------------------------------------------------------------------------------------------------------------------------------------------------------------------------------------------------------------------------------------------------------------------------------------------------------------------------------------------------------------------------------------------------------------------|
| Journal:                        | <i>BMJ Open</i>                                                                                                                                                                                                                                                                                                                                                                                                                                                                                                                                                                                                                                                                                                                                                                         |
| Manuscript ID                   | bmjopen-2019-031305.R2                                                                                                                                                                                                                                                                                                                                                                                                                                                                                                                                                                                                                                                                                                                                                                  |
| Article Type:                   | Original research                                                                                                                                                                                                                                                                                                                                                                                                                                                                                                                                                                                                                                                                                                                                                                       |
| Date Submitted by the Author:   | 22-Aug-2019                                                                                                                                                                                                                                                                                                                                                                                                                                                                                                                                                                                                                                                                                                                                                                             |
| Complete List of Authors:       | Al Rawashdeh, Nedal ; King Abdullah International Medical Research Center, Research Office; King Hussein Cancer Center, The Office of Scientific Affairs and Research<br>Damsees, Rana ; King Abdullah International Medical Research Center, Research Office; King Hussein Cancer Center, The Office of Scientific Affairs and Research<br>Al-Jeraisy, Majed ; King Abdullah International Medical Research Center, Research Office; King Saud bin Abdulaziz University for Health Sciences Al Qasim, Eman ; King Abdullah International Medical Research Center, Research Office; King Saud bin Abdulaziz University for Health Sciences<br>Deeb, Ahmad; King Abdullah International Medical Research Center, Research Office; King Saud bin Abdulaziz University for Health Sciences |
| <b>Primary Subject Heading</b>: | Public health                                                                                                                                                                                                                                                                                                                                                                                                                                                                                                                                                                                                                                                                                                                                                                           |
| Secondary Subject Heading:      | Public health, Research methods                                                                                                                                                                                                                                                                                                                                                                                                                                                                                                                                                                                                                                                                                                                                                         |
| Keywords:                       | Knowledge, Attitudes, Clinical trials < THERAPEUTICS                                                                                                                                                                                                                                                                                                                                                                                                                                                                                                                                                                                                                                                                                                                                    |
|                                 |                                                                                                                                                                                                                                                                                                                                                                                                                                                                                                                                                                                                                                                                                                                                                                                         |

SCHOLARONE™  
Manuscripts

## Knowledge of and Attitudes toward Clinical Trials in Saudi Arabia: A Cross-sectional study

Nedal Al-Rawashdeh<sup>1,2</sup>, Rana Damsees<sup>1,2</sup>, Majed Al Jeraisy<sup>1</sup>, Eman Al Qasim<sup>1</sup>, Ahmad M. Deeb<sup>1\*</sup>

1. Research Office, King Abdullah International Medical Research Center, Riyadh, Saudi Arabia; King Saud bin Abdulaziz University for Health Sciences, Riyadh Saudi Arabia; Ministry of National Guard Health Affairs, Riyadh, Saudi Arabia.
2. The Office of Scientific Affairs and Research, King Hussein Cancer Center, Amman, Jordan

Nedal Al-Rawashdeh: [rawashdehne@gmail.com](mailto:rawashdehne@gmail.com)

Rana Damsees: [rdamsees@gmail.com](mailto:rdamsees@gmail.com)

Majed Al Jeraisy: [JeraisyM@NGHA.MED.SA](mailto:JeraisyM@NGHA.MED.SA)

Eman Al Qasim: [alqasimem@NGHA.MED.SA](mailto:alqasimem@NGHA.MED.SA)

Ahmad M. Deeb: [rn\\_a\\_deeb@hotmail.com](mailto:rn_a_deeb@hotmail.com)

### \* Corresponding Author

**Ahmad M. Deeb, RN, MSN, CCRC®**

Senior Clinical Research Coordinator  
Research Office  
King Abdullah International Medical Research Center  
King Saud Bin Abdulaziz University for Health Sciences  
King Abdulaziz Medical City  
Ministry of National Guard - Health Affairs  
PO Box 22490, Mail Code 1515  
Riyadh 11426, Kingdom of Saudi Arabia  
Tel. No: +966118011111 ext. 18950  
Monile: +966547883491  
[rn\\_a\\_deeb@hotmail.com](mailto:rn_a_deeb@hotmail.com)

**Short title:** Knowledge & Attitude toward Clinical Trials

## Declarations

### Ethics approval and consent to participate

This study was approved by the Institutional Review Board (IRB) at King Abdulaziz Medical City, Riyadh, KSA.

### Consent for publication

Not applicable

### Availability of data and material

The datasets used and/or analysed during the current study are available from the corresponding author on reasonable request.

### Competing interests

The authors declare no competing interests.

### Funding

This study was supported by research grant RC16/010/R by King Abdullah International Medical Research Center. The study sponsor does not have any role in the study design, management, analysis, interpretation of the data, or in writing the manuscript.

### Author contributions statement

1  
2 Ahmad Deeb and Nedal Al Rawashdeh: Conception and design, data acquisition, data collection,  
3  
4 analytical plan, drafting of the manuscript. Rana Damsees: Conception and design and data  
5  
6 acquisition. Majed Al Jeraisy: Conception and design, data acquisition and supervision. Eman Al  
7  
8 Qasim: Conception and design and data collection. All authors critically revised the manuscript  
9  
10 for important intellectual content, and approved of the final version to be published and agreed  
11  
12 to be accountable for all aspects of the work.  
13  
14  
15

### 16 **Acknowledgements**

17  
18  
19  
20  
21 Not applicable  
22  
23  
24  
25  
26  
27  
28  
29  
30  
31  
32  
33  
34  
35  
36  
37  
38  
39  
40  
41  
42  
43  
44  
45  
46  
47  
48  
49  
50  
51  
52  
53  
54  
55  
56  
57  
58  
59  
60

## Abstract

**Objectives:** Clinical trials (CTs) are considered one of the important methods for developing new treatments and providing access to new potentially effective drugs that are still under investigation. Measuring the public's knowledge of and attitudes toward CTs is important to assessing the public's readiness and acceptance of testing drugs on human participants, which hasn't previously been assessed in the Kingdom of Saudi Arabia (KSA). The objective of this study is to explore the Saudi public's knowledge of and attitudes toward CTs as well as participation in trials to test new or approved drugs.

**Design:** Cross-sectional.

**Setting:** Al Jenadriyah cultural/heritage festival in Riyadh/KSA.

**Participants:** A structured questionnaire was developed and distributed during the 2016 Al Jenadriyah cultural/heritage festival, using a convenience sampling approach. Participating booths, exhibition halls and visitors in the festival were approached to participate in the study. The responses were converted to a percentage mean score (out of 100) for each knowledge related response and attitude.

**Primary and secondary outcome measures:** Knowledge and attitudes toward CTs.

**Results:** The sample realized as 938 (n=938). The total mean knowledge score was  $56.8 \pm 24.8$  and the attitude related score was  $61.5 \pm 28.0$ . Although most of the participants supported testing approved or off-label and new drugs on adult and pediatric patients, only a third 30.5% agreed that new drugs could be tested on healthy volunteers. The results indicated that gender,

1  
2 educational-level, income, medical background, age-group and health insurance were  
3  
4 independent predictors of the level of Knowledge of CTs. In terms of attitudes toward CTs, the  
5  
6 independent predictors were gender, educational-level and medical background.  
7  
8  
9

10 **Conclusion:** The Saudi public has a low level of knowledge and a moderately positive attitude  
11  
12 toward CTs. There is a moderate positive correlation between the two factors as knowledge of  
13  
14 CTs increases, the Saudi public will become more positive toward CTs.  
15  
16  
17

### 21 **Strength and limitations of the study**

- 22
- 23
- 24
- 25 • The knowledge and attitudes of the Saudi public toward CTs are under-researched.
- 26
- 27 • This is the first study to explore the Saudi public's knowledge and attitudes in terms of the
- 28 different phases of CTs in adult and pediatric populations.
- 29
- 30
- 31
- 32 • The main limitation is possible selection bias due to employing a convenience sampling
- 33 method.
- 34
- 35
- 36
- 37
- 38
- 39
- 40
- 41
- 42
- 43
- 44
- 45
- 46
- 47
- 48
- 49
- 50
- 51
- 52
- 53
- 54
- 55
- 56
- 57
- 58
- 59
- 60

## Introduction

A clinical trial (CT) is a superior research tool for advancing medical knowledge and practice, as the results are considered to provide the highest level of evidence for medical practice and decision-making.<sup>1</sup> Volunteer participation is at the core of a successful CT. The participation of an adequate number of study participants is crucial in achieving the study's objectives, namely testing the hypothesis and answering the research questions. Failure to recruit an adequate number of participants could result in wasted time, money, and effort.<sup>2</sup> It may also delay the acceptance of the trial results as well as the completion of the drug development process.

Knowledge of and attitudes toward CTs are considered major challenges for participant recruitment.<sup>3-6</sup> Several studies reported that knowledge of CTs and attitudes toward participation are interrelated,<sup>7-11</sup> as increased knowledge promotes a positive attitude toward CT participation. Low recruitment rates for CTs may be improved through increasing the public's knowledge about CTs<sup>6,9,11</sup> and by highlighting the social responsibility perspective of how participation in CTs can contribute to the improvement of the public's health.<sup>12,13</sup> Improving the public's knowledge of CTs represents an important initial step in improving CT recruitment in the future.<sup>9,12,14</sup>

In the Kingdom of Saudi Arabia (KSA), clinical research has advanced during the last few decades.<sup>15</sup> KSA researchers have contributed to medical literature by conducting different types of research, including investigator-initiated CTs and international multicenter-sponsored CTs.<sup>15</sup> Measuring the knowledge and attitudes of the Saudi public toward CTs is crucial to assess their



1  
2  
3 readiness and acceptance of CTs in Saudi Arabia and to provide an evidence-base to improve CT  
4  
5 recruitment and decision-making processes. In addition, it will provide reliable information for  
6  
7 researchers and healthcare leaders for strategic planning of public engagement in CT awareness  
8  
9 campaigns. From the public's perspective, these efforts may be beneficial through increasing  
10  
11 their knowledge and awareness of CTs, improved medical knowledge through dissemination of  
12  
13 CT results, and sharing of public preferences for future CTs.  
14  
15

16  
17  
18 Several studies have reported the knowledge and attitudes of patients, or families,  
19  
20 toward CTs in health care settings in Saudi Arabia<sup>16-20</sup>; however, studies measuring the  
21  
22 knowledge and attitudes of the Saudi public in general are lacking. The purpose of this study was  
23  
24 to assess the Saudi public's knowledge of and attitudes toward CTs in general and more  
25  
26 specifically, the attitudes toward participation in CTs for drug development.  
27  
28  
29  
30

31 The study addressed the following four questions: What does the Saudi public know about  
32  
33 CTs? What is the attitude of individuals in Saudi Arabia toward CTs and toward participation in  
34  
35 CTs? Is there a correlation between the level of public knowledge and the attitudes of individuals  
36  
37 in Saudi Arabia toward CTs? What factors can be predictive of the levels of public knowledge and  
38  
39 attitudes toward CTs in the Saudi population?  
40  
41  
42  
43

## 44 **Materials and Methods**

### 45 **Setting**

46  
47  
48 This cross-sectional study was conducted between February 2 and February 19, 2016 at  
49  
50 the Al Jenadriyah Cultural and Heritage Festival. The festival takes place in Riyadh and hosts  
51  
52 millions of residents and visitors from the different regions in the country. We selected this event  
53  
54  
55  
56  
57  
58  
59  
60

1  
2 as it provided us with a unique chance to interview a representative cross-section from all regions  
3  
4 of KSA. The study was approved by the Institutional Review Board (IRB) at King Abdulaziz Medical  
5  
6 City, Riyadh, KSA.  
7  
8  
9

## 10 **Study participants**

11  
12  
13  
14 The study included adults of both genders who were willing to participate. A convenience  
15  
16 sampling approach was used. Participating booths and exhibition halls in the festival were  
17  
18 approached and festival visitors were invited to participate in the study. All of the participants  
19  
20 gave informed consent by checking the YES box indicating their willingness to complete the  
21  
22 questionnaire. Participants did not receive any compensation for participation in the study.  
23  
24  
25

## 26 **Patient and public involvement**

27  
28  
29  
30 The public was not included in the development of the research questions or the design  
31  
32 of the study. However, the questionnaire was pre-tested with a different sample of the general  
33  
34 public before implementation.  
35  
36  
37

## 38 **Sample size**

39  
40  
41 The population of KSA is approximately 31,742,308 (Central Department of Statistics and  
42  
43 Information), including 11,677,338 expatriates (Non-Saudi).<sup>21</sup> On the basis of this population  
44  
45 estimate, a 0.05 margin of error, a 95% confidence level, and a response rate of 50%, the  
46  
47 minimum sample size calculated for this study was 385. We increased our sample to 1000 to  
48  
49 reduce the sampling errors and variability between the characteristics of the sample and the  
50  
51 Saudi general population.  
52  
53  
54  
55  
56  
57  
58  
59  
60

## Data collection

A structured questionnaire was developed in Arabic. The questionnaire was divided in three sections: demographic information, knowledge and attitude.

The following variables were included in the demographic information section: gender, age, educational level, monthly income, nationality, residential area, employment status, marital status, health insurance, chronic diseases, medical background (working in a healthcare facility or having health-related education), and previous participation in medical research.

The knowledge section was composed of 12 questions, and the participant's responses were scored as correct (score = 1) or incorrect/not sure (score = 0). The total knowledge score was converted to a percentage mean score with a possible maximum value of 100, a score of 100 indicates perfect knowledge of CTs.

The attitude section was composed of nine direct questions, and participant answers were scored as positive (score = 1) or negative/not sure (score = 0). The total attitude score was converted to a percentage mean score with a possible maximum value of 100, a score of 100 indicates a positive attitude toward CTs.

Based on previous studies, the overall level of knowledge and attitude was classified in three levels following Bloom's cut-off point criteria: above 80% (High level), 60-79% (Moderate level), less than 60% (Low level).<sup>22-24</sup>

1  
2 We ensured that the language used for the questions was clear and understandable to  
3  
4 enable the participants to answer the questions, even if they were not aware of CTs. The  
5  
6 questionnaire was validated using a content validation process. A panel of expert analysts was  
7  
8 used to evaluate the questions and they rated each question as essential, useful or irrelevant in  
9  
10 the context of measuring knowledge and attitudes. It was pre-tested using a sample of 28  
11  
12 participants. The result of the pre-test was that complex scientific terms were simplified.  
13  
14 Reliability was tested by calculating the Cronbach alpha for the pre-test sample for both the  
15  
16 knowledge and attitude sections (21 items). The Cronbach alpha score was 0.81.  
17  
18  
19  
20  
21  
22

## 23 **Data analysis**

24  
25  
26 The categorical variables are represented as frequency and percentage and the  
27  
28 continuous variables as mean  $\pm$  standard deviation (s.d.). Normality was tested by the skewness  
29  
30 coefficient, which indicated that the knowledge and attitude data were normally distributed. The  
31  
32 Student's *t*-test and one-way analysis of variance (ANOVA) were used as tests of significance. The  
33  
34 Pearson correlation coefficient was used to calculate the correlation between the knowledge and  
35  
36 attitude scores. A generalized linear model was used to determine the independent predictors  
37  
38 of knowledge and attitudes toward CTs. In this models, we controlled for gender, age, education,  
39  
40 monthly income, nationality, residency, marital status, employment, health insurance, chronic  
41  
42 disease, medical background, previous medical research participation and medical research  
43  
44 participation of someone close. All calculations were performed using the Statistical Package for  
45  
46 the Social Sciences (version 23; SPSS Inc., Chicago, IL, USA).  
47  
48  
49  
50  
51  
52  
53  
54  
55  
56  
57  
58  
59  
60

## Results

### Participant characteristics

A total of 1,084 members of the public were approached to participate in the study. In total, 938 (86.5%) agreed to complete the questionnaire with one missing value in the gender and nationality variables. Of the 938 participants, males were predominant (61.6%). The age groups with the highest representation were the 18-30 years (54.2%) and 31-40 years (27.6%). The majority of the participants (60.1%) reported achieving a tertiary educational level and 75.7% reported a monthly income of less than 10,000 SAR (Saudi Arabian Riyal) which is equivalent to approximately 2,700 USD (United States Dollar). Approximately half of the participants were single (48.7%), and 22.2% indicated being diagnosed with a chronic disease. Just more than a quarter (27.7%) of the sample had a medical background (working in a healthcare facility or having health-related education). A small group (15.9%) declared that they already participated in medical research, and 26.5% knew someone who participated in medical research in the past (Table 1).

### Knowledge about clinical trials in Saudi Arabia

The overall percentage mean score  $\pm$ SD for knowledge regarding CTs was 56.8  $\pm$ 24.8. Although some participants were not aware of the term 'clinical trial', almost half (43.7%) could define the concept correctly. Most of the participants (71.8%) agreed that CTs are subject to ethical guidelines, but only 26.8% were aware of the concept of an institutional review board

1  
2  
3 **(Table 2)**. The majority (81.1%) was aware of the Saudi Food and Drug Authority (SFDA), and  
4  
5 66.4% were aware of their role in the regulation of CTs. Most of the participants (72.1%) agreed  
6  
7 that CTs benefit the community, and 46.5% responded correctly regarding the benefits of CTs for  
8  
9 the study participants. Approximately half of the sample knew the time that investigators can  
10  
11 initiate a CT (56.0%) as well as the right of CT participants to withdraw from (47.6%) from a study.  
12  
13  
14 Other findings from the knowledge section of the questionnaire are listed in **Table 2**.

## 15 16 17 18 **Attitudes toward clinical trials in Saudi Arabia**

19  
20  
21 The overall percentage mean score  $\pm$ SD for Saudi attitudes toward CTs was 61.5  $\pm$ 28.0 out  
22  
23 of a 100 score. Most of the participants (59.5%) had a positive attitude toward testing new drugs  
24  
25 with adult patients in Saudi Arabia, and 63.2% were positive about testing approved/off-label  
26  
27 drugs (approved and marketed drug for other indication) using patients. However, only 30.5% of  
28  
29 the participants were positive about conducting CTs using healthy volunteers (Phase I). The  
30  
31 attitudes were similar for pediatric CTs, as 48.2% and 56.4% agreed with testing new drugs or  
32  
33 approved/off-label drugs on pediatric patients, respectively. The majority of the participants  
34  
35 (72.7%) agreed that CTs were important in terms of drug development, and 69.1% confirmed the  
36  
37 possibility of participating in a CT should the opportunity arise to them or a close family member.  
38  
39  
40 The majority of the participants (86.8%) indicated a willingness to learn more about CTs. Other  
41  
42 findings from the attitude section of the questionnaire are listed in **Table 3**.

## 43 44 45 46 47 48 49 **Factors associated with increased knowledge and more positive** 50 51 52 **attitudes toward clinical trials**

1  
2  
3 The univariate analysis revealed that females had a higher level of knowledge about CTs  
4  
5 than males. In addition, the 31-40 years age group had the highest level of knowledge compared  
6  
7 to other age categories (**Table 1**). Clinical trial related knowledge increased with an increased  
8  
9 level of education ( $P=0.001$ ) as well as an increased monthly income ( $P=0.001$ ). Participants from  
10  
11 the Central Region of KSA had a higher level knowledge compared to other regions ( $P=0.001$ )  
12  
13 (**Table 1**). Undergraduate students and governmental employees had a higher level of knowledge  
14  
15 compared to other employment categories ( $P=0.001$ ) (**Table 1**). Having governmental or private  
16  
17 health insurance ( $P=0.001$ ) was associated with a higher level of CT related knowledge.  
18  
19 Noteworthy is that participants without chronic diseases had a higher level of knowledge than  
20  
21 those with chronic diseases ( $P=0.017$ ). Previous participation in medical research or knowing  
22  
23 someone who participated in the past was associated with better CT related knowledge ( $P=0.001$ )  
24  
25 (**Table 1**).

26  
27  
28  
29  
30  
31 After adjusting for possible confounders, the beta coefficients for males ( $B= -14.1$ ;  
32  
33  $P=0.001$ ), non-educated participants ( $B= -19.6$ ;  $P=0.001$ ), participants with no income ( $B= -9.7$ ;  
34  
35  $P=0.011$ ), and no medical background ( $B= -4.7$ ;  $P=0.015$ ) had significantly lower knowledge  
36  
37 scores. By contrast, participants in the 41-60 years age ( $B = 12.1$ ;  $P=0.036$ ) and those with health  
38  
39 insurance ( $B= 12.9$ ;  $P=0.003$ ) were more knowledgeable regarding CTs (**Table 4**).

40  
41  
42  
43  
44  
45  
46 In terms of attitudes, females were more positive toward CTs ( $P= 0.001$ ) than males. The  
47  
48 31-40 years and 41-60 years age groups were more positive compared to other age categories  
49  
50 ( $P=0.007$ ), and having a higher educational level was also associated with a more positive attitude  
51  
52 ( $P=0.001$ ) (**Table 1**). As with the knowledge section, undergraduate students and governmental  
53  
54

1  
2 employees were more positive toward CTs ( $P= 0.028$ ) than participants in other employment  
3  
4 categories (**Table 1**) as well as having governmental or private health insurance ( $P=0.001$ ).  
5  
6 Participants with a medical background or who had previously participated in medical research  
7  
8 tended to be more positive ( $P=0.001$ ) compared to participants with no medical background or  
9  
10 who had never participated in medical research (**Table 1**).  
11  
12

13  
14 After adjusting for the possible confounders, being male ( $B= -9.2$ ;  $P=0.001$ ), uneducated  
15  
16 ( $B= -18.4$ ,  $P=0.004$ ), or not having a medical background ( $B= -5.0$ ;  $P=0.039$ ), were associated with  
17  
18 more a negative attitudes toward CTs (**Table 4**).  
19  
20  
21  
22  
23

## 24 **Correlation between Saudi public's knowledge and attitudes toward** 25 26 27 28 **clinical trials** 29 30

31 Our results indicated a moderately positive relationship between the Saudi public's  
32  
33 knowledge and attitudes toward CTs (Pearson's  $r= 0.564$ ,  $P=0.0001$ ). Therefore, we predict that  
34  
35 as knowledge of CTs increases, the Saudi public will become more positive toward CTs.  
36  
37  
38  
39  
40

## 41 **Discussion** 42 43

44 This public survey revealed a general lack of knowledge regarding CTs. Most of the  
45  
46 participants could not identify or correctly define the term 'clinical trial'. Although most of the  
47  
48 Saudi public is aware of their right to voluntarily participate in CTs, they were not aware of their  
49  
50 right to withdraw from CTs. The current study is supported with similar findings in studies  
51  
52 conducted in healthcare settings (with patients and/or their families) within Saudi Arabia.<sup>17-20</sup>  
53  
54  
55  
56  
57  
58  
59  
60



1  
2 The reason may possibly be interpreted as the lack of institutional and national campaigns  
3 promoting CTs.<sup>5,25</sup>  
4

5  
6 Although most of the participants agreed that CTs are governed by ethical principles,  
7 they were not aware of an IRB and its role in protecting human participants. In a study done in  
8 a healthcare setting, Sheblaq et al. reported that the majority of the patients diagnosed with  
9 cancer were not aware of the role of the IRB.<sup>17</sup> The public tends to trust authorities to protect  
10 them even though they do not know who are responsible for playing this role. We observed this  
11 phenomenon repeatedly when participants answered positively to questions regarding their  
12 trust in the study team and in their compliance with regulatory guidelines when initiating a trial  
13 or recruiting participants. The Saudi public recognized the SFDA and its role in CTs, most likely  
14 due to their well-known food and drug related regulatory activities in Saudi Arabia.  
15  
16

17  
18 The overall level of attitude of the Saudi public toward participation in CTs was  
19 moderately positive. The Saudi public agrees that CTs may provide benefits for society as a  
20 whole and the participants. In addition, trust in the study team may explain the favorable  
21 attitude toward participation in CTs. It could be argued that participant responses may change  
22 in real-life situations such as in healthcare settings. However, our results were consistent with  
23 other studies conducted in health care settings in Saudi Arabia investigating the opinions of  
24 patients and families regarding participation in CTs.<sup>16-18</sup>  
25  
26

27  
28 Similarly, but to a lesser degree, the Saudi public agreed with the idea of conducting  
29 pediatric CTs for approved/off-label drugs. However, only 48% of the participants indicated that  
30 it was acceptable to test new drugs in pediatric participants. Objection to the use of new drugs  
31 or vaccines was one of the factors underlying the opposition to pediatric CTs<sup>26</sup>. Although the  
32  
33  
34  
35  
36  
37  
38  
39  
40  
41  
42  
43  
44  
45  
46  
47  
48  
49  
50  
51  
52  
53  
54  
55  
56  
57  
58  
59  
60

1  
2 study did not explore the reasons underpinning the motivation to participate in CTs, we believe  
3  
4 that the fear of adverse events, as well as safety concerns, may explain this objection.<sup>25,27</sup>  
5  
6

7 Phase I CTs, which often involve testing new drugs in healthy volunteers, are important  
8  
9 in the process of drug development. However, several ethical dilemmas influence conducting  
10  
11 such studies with healthy volunteers and patients.<sup>28</sup> In our study, the Saudi public was negative  
12  
13 regarding testing new drugs on healthy volunteers. Only 30.5% of the participants agreed with  
14  
15 the idea of conducting CTs on healthy volunteers in Saudi Arabia. This sentiment may be related  
16  
17 to the lack of knowledge regarding the purpose of testing new drugs on healthy volunteers.  
18  
19 Conducting public educational campaigns about CTs in Saudi Arabia is pivotal to improve their  
20  
21 knowledge and awareness about CTs.  
22  
23  
24  
25

26  
27 Consistent with other studies<sup>9,11</sup>, participants' attitudes toward CTs were markedly  
28  
29 dependent on their knowledge of CTs. We predict that as knowledge about CTs increases, the  
30  
31 Saudi public will become more positive. A low level of knowledge regarding CTs may indicate  
32  
33 misunderstanding or confusion regarding the purposes of the different phases of CTs. In turn,  
34  
35 participants' answers may have been affected by insufficient knowledge. We believe that many  
36  
37 participants used their common sense to answer some survey questions and may have begun  
38  
39 to recognize the meaning of CTs while answering further questions. These observations support  
40  
41 the need for CT related public educational campaigns, since the majority of the participants  
42  
43 were interested to learn more about CTs.  
44  
45  
46  
47  
48

49 Male gender, lower education, lack of a medical background, lower monthly income, a  
50  
51 lower age group, and lack of health insurance were independent predictors of a low level of  
52  
53 knowledge regarding CTs among the Saudi public. Male gender, less education and lack of a  
54  
55  
56  
57  
58  
59  
60

1  
2 medical background were independent predictors of a negative attitude toward CTs. Our  
3  
4 results are consistent with a United States household survey conducted to assess the level of  
5  
6 public participation in and awareness of clinical and translational research, higher levels of  
7  
8 income and education were associated with better participation and awareness.<sup>29</sup> In a study  
9  
10 conducted with patients diagnosed with cancer in a healthcare setting, a lower level of  
11  
12 education and income, as well as race and ethnicity, were associated with decreased awareness  
13  
14 of CTs<sup>9</sup>. Similarly, lower income and education were associated with a reduced willingness to  
15  
16 participate in CTs in African-American patients diagnosed with cancer<sup>30</sup>. A study of patients  
17  
18 with cancer in Saudi Arabia found that higher education was the only significant predictor of  
19  
20 trial participation.<sup>17</sup>

21  
22 Unlike other studies with the public or in healthcare settings<sup>5,9,25,31-33</sup>, gender was an  
23  
24 independent predictor of knowledge and attitudes. Males were associated with a lower level of  
25  
26 knowledge and with a more negative attitude toward CTs. The underlying rationale has not  
27  
28 been clearly discussed in literature. Gender differences regarding knowledge and attitudes  
29  
30 toward CTs should be considered for future studies.

31  
32 In the previous studies investigating knowledge and attitudes toward CTs in Saudi  
33  
34 Arabia, the sample size was much smaller and mainly involved patients and/or their families in  
35  
36 healthcare settings.<sup>17,18</sup> To our knowledge, this is the first study exploring the Saudi public's  
37  
38 knowledge and attitudes toward CTs, external of a healthcare setting. Furthermore, it is the  
39  
40 first study to solicit public perspectives regarding the different phases of CTs conducted in adult  
41  
42 and pediatric populations.

## 43 44 45 46 47 48 49 50 51 52 53 54 55 56 57 58 59 60

1  
2  
3 The Saudi public has a low level of knowledge and moderately positive attitudes toward  
4  
5 CTs. Increasing the Saudi public's knowledge may contribute to positive attitudes toward  
6  
7 participation in and support of CTs; supporting our proposition of educational campaigns to  
8  
9 increase awareness and knowledge of CTs. These campaigns should target the less  
10  
11 knowledgeable sub-groups identified in the study and focus on the importance of evaluating  
12  
13 new drugs on healthy volunteers (Phase I clinical trials). In addition, our results support  
14  
15 conducting and investing in CTs in KSA. Conducting similar studies in the future, taking the  
16  
17 limitations of this study in consideration, may facilitate measuring the improvement of  
18  
19 knowledge over time. We also recommend in-depth qualitative and focus-group-based studies  
20  
21 for a deeper understanding of participant perspectives.  
22  
23  
24  
25

## 26 27 **Study limitations** 28

29  
30 The main limitation in this study is related to possible selection bias due to using a  
31  
32 convenient sampling method; however the effect of the limitation may have been minimized by  
33  
34 the large sample size and the diversity of the visitors. For example, in our sample the  
35  
36 distribution of male gender 61.6% was slightly larger than in general population while in the age  
37  
38 group 31 to 40 it was 27.6% which is slightly lower.  
39  
40  
41  
42  
43  
44  
45  
46  
47  
48  
49  
50  
51  
52  
53  
54  
55  
56  
57  
58  
59  
60

## Abbreviations

ANOVA: Analysis of variance

CTs: Clinical Trials

IRB: Institutional review board

KSA: Kingdom of Saudi Arabia

SAR: Saudi Arabian Riyal

S.D: Standard Deviation

SFDA: Saudi Food and Drug Authority

USD: United States Dollar

## References

1. Oxford Centre for Evidence-based Medicine – Levels of Evidence. 2009. 2017, at [http://www.cebm.net/oxford-centre-evidence-based-medicine-levels-evidence-march-2009/.](http://www.cebm.net/oxford-centre-evidence-based-medicine-levels-evidence-march-2009/)
2. Wyse RK. Accelerating patient recruitment in clinical trials: in-depth report from the SMi 2nd annual conference In: Ross C, editor. The SMi 2nd annual conference 2006; London: NetworkPharma Ltd.
3. Verheggen FW, Nieman FH, Reerink E, Kok GJ. Patient satisfaction with clinical trial participation. *Int J Qual Health Care* 1998;10:319-30.
4. Public Engagement and Clinical Trials: New Models and Disruptive Technologies: Workshop Summary. Washington (DC)2012.
5. Leiter A, Diefenbach MA, Doucette J, Oh WK, Galsky MD. Clinical trial awareness: Changes over time and sociodemographic disparities. *Clin Trials* 2015;12:215-23.
6. The Need for Awareness of Clinical Research. National Institute of Health, 2016. 2017, at <https://www.nih.gov/health-information/nih-clinical-research-trials-you/need-awareness-clinical-research.>
7. Kim SH, Tanner A, Friedman DB, Foster C, Bergeron C. Barriers to Clinical Trial Participation: Comparing Perceptions and Knowledge of African American and White South Carolinians. *J Health Commun* 2015;20:816-26.
8. Kim SH, Tanner A, Friedman DB, Foster C, Bergeron CD. Barriers to clinical trial participation: a comparison of rural and urban communities in South Carolina. *J Community Health* 2014;39:562-71.
9. Lara PN, Jr., Paterniti DA, Chiechi C, et al. Evaluation of factors affecting awareness of and willingness to participate in cancer clinical trials. *J Clin Oncol* 2005;23:9282-9.
10. Joshi V, Kulkarni AA. Public awareness of clinical trials: A qualitative pilot study in Pune. *Perspect Clin Res* 2012;3:125-32.
11. Miller S, Hudson S, Egleston B, et al. The relationships among knowledge, self-efficacy, preparedness, decisional conflict and decisions to participate in a cancer clinical trial. *Psychooncology* 2013;22: 481–9.
12. Denicoff AM, McCaskill-Stevens W, Grubbs SS, et al. The National Cancer Institute-American Society of Clinical Oncology Cancer Trial Accrual Symposium: summary and recommendations. *J Oncol Pract* 2013;9:267-76.
13. Trantham LC, Carpenter WR, DiMartino LD, et al. Perceptions of Cancer Clinical Research Among African American Men in North Carolina. *J Natl Med Assoc* 2015;107:33-41.
14. Featherstone K, Donovan JL. "Why don't they just tell me straight, why allocate it?" The struggle to make sense of participating in a randomised controlled trial. *Soc Sci Med* 2002;55:709-19.
15. Jamjoom AB, Jamjoom AM, Samman AM, Gahtani AY. Fate of registered clinical trials performed in Saudi Arabia. *Saudi Med J* 2015;36:1245-8.
16. Bazarbashi S, Hassan A, Eldin AM, Soudy H, Hussain F. Awareness and Perceptions of Clinical Trials in Cancer Patients and Their Families in Saudi Arabia. *J Cancer Educ* 2015;30:655-9.
17. Sheblaq NR, Traifi S, Sakiani MA, Gasmelseed A, Abolfotouh MA, Jazieh AR. Awareness and attitude of cancer patients about participation in clinical research (CR) in Saudi Arabia. *J Clin Oncol* 2013;(suppl; abstr e17528).
18. Al-Tannir MA, El-Bakri N, Abu-Shaheen AK. Knowledge, Attitudes and Perceptions of Saudis towards Participating in Clinical Trials. *PLoS One* 2016;11:e0143893.
19. Al-Dakhil LO, Alanazy R, Al-Hamed RE, Al-Mandeel H, Alobaid A. Attitudes of Patients in Developing Countries Toward Participating in Clinical Trials: A Survey of Saudi Patients Attending Primary Health Care Services. *Oman Med J* 2016;31:284-9.

20. Almutairi KM, Alonazi WB, Alodhayani AA, et al. Barriers to Cancer Clinical Trial Participation Among Saudi Nationals: A Cross-Sectional Study. *J Relig Health* 2017;56:623-34.
21. The Central Department of Statistics and Information 2016. (Accessed 24/04/2017, 2017, at [https://www.stats.gov.sa/sites/default/files/en-demographic-research-2016\\_4.pdf](https://www.stats.gov.sa/sites/default/files/en-demographic-research-2016_4.pdf).)
22. Abdullahi A, Hassan A, Kadarman N, Saleh A, Baraya YuSa, Lua PL. Food safety knowledge, attitude, and practice toward compliance with abattoir laws among the abattoir workers in Malaysia. *International journal of general medicine* 2016;9:79-87.
23. Nur Ain M, Azfar M, Omarulharis S, et al. Knowledge, Attitude And Practice Of Dengue Prevention Among Sub Urban Community In Sepang, Selangor. *International Journal of Public Health and Clinical Sciences* 2017;4:73-83.
24. Malhotra V, Kaura S, Sharma H. Knowledge, attitude and practices about hepatitis B and Infection Control Measures among dental students in Patiala. *Journal of Dental and Allied Sciences* 2017;6:65-9.
25. Choi YJ, Beck SH, Kang WY, et al. Knowledge and Perception about Clinical Research Shapes Behavior: Face to Face Survey in Korean General Public. *J Korean Med Sci* 2016;31:674-81.
26. Nasef N, Shabaan A, Mohammed S, et al. Factors influencing parental consent for participation in clinical research involving their children in Egypt. *East Mediterr Health J* 2014;20:162-8.
27. Nabulsi M, Khalil Y, Makhoul J. Parental attitudes towards and perceptions of their children's participation in clinical research: a developing-country perspective. *J Med Ethics* 2011;37:420-3.
28. Elliott C, Abadie R. Exploiting a research underclass in phase 1 clinical trials. *N Engl J Med* 2008;358:2316-7.
29. Davis MM, Clark SJ, Butchart AT, Singer DC, Shanley TP, Gipson DS. Public participation in, and awareness about, medical research opportunities in the era of clinical and translational research. *Clin Transl Sci* 2013;6:88-93.
30. Advani AS, Atkeson B, Brown CL, et al. Barriers to the participation of African-American patients with cancer in clinical trials: a pilot study. *Cancer* 2003;97:1499-506.
31. Comis RL, Miller JD, Aldige CR, Krebs L, Stoval E. Public attitudes toward participation in cancer clinical trials. *J Clin Oncol* 2003;21:830-5.
32. Joshi VD, Oka GA, Kulkarni AA, Bivalkar VV. Public awareness and perception of clinical trials: Quantitative study in Pune. *Perspect Clin Res* 2013;4:169-74.
33. Ohmann C, Deimling A. Attitude towards clinical trials: results of a survey of persons interested in research. *Inflamm Res* 2004;53 Suppl 2:S142-7.

Table 1. Participant characteristics and the unadjusted prectors for knowledge and attitudes

| Characteristics                                                | Group                                           | Overall<br>N = 938 |      | Knowledge<br>Overall mean = 56.8 ±<br>24.8 |      |        | Attitudes<br>Overall mean = 61.5 ±<br>28.0 |      |        |
|----------------------------------------------------------------|-------------------------------------------------|--------------------|------|--------------------------------------------|------|--------|--------------------------------------------|------|--------|
|                                                                |                                                 | N                  | %    | Mean                                       | s.d. | P      | Mean                                       | s.d. | P      |
| Gender                                                         | Male                                            | 577                | 61.6 | 51.37                                      | 24.4 | 0.001* | 57.40                                      | 28.0 | 0.001* |
|                                                                | Female                                          | 360                | 38.4 | 65.62                                      | 22.9 |        | 67.90                                      | 26.8 |        |
| Age                                                            | 18–30                                           | 508                | 54.2 | 55.45                                      | 26.0 | 0.001* | 59.36                                      | 28.2 | 0.007* |
|                                                                | 31–40                                           | 259                | 27.6 | 60.07                                      | 23.2 |        | 63.28                                      | 27.8 |        |
|                                                                | 41–60                                           | 153                | 16.3 | 58.17                                      | 22.0 |        | 66.67                                      | 26.0 |        |
|                                                                | 61+                                             | 18                 | 1.9  | 37.50                                      | 22.7 |        | 50.62                                      | 34.1 |        |
| Education                                                      | Not educated                                    | 27                 | 2.9  | 35.19                                      | 18.0 | 0.001* | 46.09                                      | 29.8 | 0.001* |
|                                                                | High school or less                             | 347                | 37.0 | 48.37                                      | 22.7 |        | 57.25                                      | 28.0 |        |
|                                                                | University, college or more                     | 563                | 60.1 | 63.06                                      | 24.2 |        | 64.81                                      | 27.3 |        |
| Monthly income                                                 | • No income                                     | 195                | 20.8 | 49.62                                      | 22.7 | 0.001* | 57.78                                      | 28.5 | 0.084  |
|                                                                | • Less than 5,000 SAR<br>• Less than 1,300 USD  | 280                | 29.9 | 56.13                                      | 26.1 |        | 62.02                                      | 27.2 |        |
|                                                                | • 5,001 to 10,000 SAR<br>• 1,301 to 2,700 USD   | 234                | 25.0 | 56.73                                      | 23.0 |        | 60.64                                      | 28.2 |        |
|                                                                | • SAR 10,001 to 15,000<br>• USD 2,701 to 4,000  | 148                | 15.8 | 61.43                                      | 24.2 |        | 63.74                                      | 28.0 |        |
|                                                                | • More than 15,000 SAR<br>• More than 4,000 USD | 79                 | 8.5  | 68.88                                      | 25.3 |        | 67.37                                      | 27.9 |        |
|                                                                |                                                 |                    |      |                                            |      |        |                                            |      |        |
| Nationality                                                    | Saudi                                           | 817                | 87.3 | 57.27                                      | 24.6 | 0.143  | 62.10                                      | 27.7 | 0.095  |
|                                                                | Non-Saudi                                       | 119                | 12.7 | 53.71                                      | 25.8 |        | 57.52                                      | 29.4 |        |
| Residency                                                      | Central region                                  | 707                | 75.4 | 59.21                                      | 24.4 | 0.001* | 62.93                                      | 28.5 | 0.055  |
|                                                                | Western region                                  | 86                 | 9.2  | 52.52                                      | 27.6 |        | 59.04                                      | 28.3 |        |
|                                                                | Northern region                                 | 59                 | 6.3  | 46.19                                      | 25.0 |        | 53.48                                      | 25.1 |        |
|                                                                | Southern region                                 | 60                 | 6.4  | 49.31                                      | 20.7 |        | 57.04                                      | 22.5 |        |
|                                                                | Eastern region                                  | 26                 | 2.8  | 47.76                                      | 21.3 |        | 58.12                                      | 26.9 |        |
| Marital Status                                                 | Single                                          | 455                | 48.7 | 56.06                                      | 26.7 | 0.549  | 60.59                                      | 28.3 | 0.130  |
|                                                                | Married                                         | 444                | 47.5 | 57.04                                      | 22.8 |        | 61.61                                      | 27.5 |        |
|                                                                | Other                                           | 35                 | 3.8  | 60.48                                      | 22.1 |        | 70.48                                      | 28.8 |        |
| Employment                                                     | Student in school                               | 78                 | 8.3  | 47.54                                      | 24.0 | 0.001* | 56.13                                      | 27.4 | 0.028* |
|                                                                | Undergraduate student/<br>university or college | 166                | 17.8 | 63.15                                      | 26.0 |        | 65.66                                      | 25.6 |        |
|                                                                | Government sector                               | 235                | 25.0 | 61.70                                      | 24.1 |        | 64.68                                      | 28.1 |        |
|                                                                | Private sector                                  | 208                | 22.2 | 56.29                                      | 25.4 |        | 59.56                                      | 28.0 |        |
|                                                                | Military                                        | 54                 | 5.7  | 52.16                                      | 23.2 |        | 55.76                                      | 30.6 |        |
|                                                                | Private work/owner                              | 61                 | 6.8  | 50.68                                      | 22.5 |        | 56.65                                      | 31.1 |        |
|                                                                | Retired                                         | 26                 | 2.7  | 51.92                                      | 21.9 |        | 65.38                                      | 31.5 |        |
|                                                                | Not working                                     | 62                 | 6.6  | 44.49                                      | 21.7 |        | 57.17                                      | 26.3 |        |
|                                                                | Housewife                                       | 47                 | 4.9  | 59.22                                      | 18.9 |        | 64.30                                      | 26.2 |        |
| Health insurance                                               | Governmental                                    | 560                | 59.7 | 58.23                                      | 25.2 | 0.001* | 64.09                                      | 27.4 | 0.001* |
|                                                                | Private                                         | 116                | 12.4 | 58.41                                      | 25.0 |        | 58.43                                      | 30.1 |        |
|                                                                | Other                                           | 226                | 24.1 | 55.20                                      | 22.5 |        | 58.46                                      | 27.4 |        |
|                                                                | No insurance                                    | 36                 | 3.8  | 40.05                                      | 24.9 |        | 49.38                                      | 28.8 |        |
| Chronic disease                                                | Yes                                             | 208                | 22.2 | 53.21                                      | 23.7 | 0.017* | 59.19                                      | 27.7 | 0.183  |
|                                                                | No                                              | 730                | 77.8 | 57.85                                      | 25.0 |        | 62.12                                      | 28.0 |        |
| Medical background                                             | Yes                                             | 259                | 27.7 | 65.99                                      | 26.6 | 0.001* | 67.35                                      | 27.5 | 0.001* |
|                                                                | No                                              | 677                | 72.3 | 53.37                                      | 23.1 |        | 59.23                                      | 27.9 |        |
| Previous medical research participation                        | Yes                                             | 149                | 15.9 | 65.83                                      | 25.8 | 0.001* | 66.44                                      | 27.6 | 0.001* |
|                                                                | Was requested, but didn't participate           | 11                 | 1.1  | 50.00                                      | 22.4 |        | 63.64                                      | 27.3 |        |
|                                                                | No                                              | 737                | 78.6 | 55.54                                      | 24.3 |        | 60.65                                      | 28.1 |        |
|                                                                | Not sure                                        | 41                 | 4.4  | 48.98                                      | 22.3 |        | 57.45                                      | 26.0 |        |
| Do you know somebody who has participated in medical research? | Yes                                             | 248                | 26.5 | 60.42                                      | 24.6 | 0.001* | 62.23                                      | 27.6 | 0.100  |
|                                                                | No                                              | 596                | 63.6 | 57.30                                      | 24.6 |        | 62.99                                      | 27.8 |        |
|                                                                | Not sure                                        | 93                 | 9.9  | 44.18                                      | 23.1 |        | 49.46                                      | 27.7 |        |

\* Significant at  $\alpha = 0.05$ .



**Table 2. Participant knowledge related responses**

| <b>Variables</b>                                                                      | <b>N (% of participants)</b> |
|---------------------------------------------------------------------------------------|------------------------------|
| <b>Have you heard about clinical trials before?</b>                                   |                              |
| Yes                                                                                   | 289 (30.8)                   |
| No/not sure                                                                           | 648 (69.1)                   |
| <b>What is the definition of a clinical trial?</b>                                    |                              |
| Studies in clinics to survey patients opinion about health care topics                | 139 (14.8)                   |
| Experiments on animals                                                                | 119 (12.7)                   |
| Studies to test new drugs or procedure on humans                                      | 410 (43.7)                   |
| Graduation projects for medical students                                              | 62 (6.6)                     |
| Not sure                                                                              | 208 (22.2)                   |
| <b>Have you heard about an IRB before?</b>                                            |                              |
| Yes                                                                                   | 251 (26.8)                   |
| No                                                                                    | 685 (73.1)                   |
| <b>Have you heard of the SFDA before?</b>                                             |                              |
| Yes                                                                                   | 761 (81.1)                   |
| No                                                                                    | 177 (18.9)                   |
| <b>Does the SFDA have a role in regulating clinical trials?</b>                       |                              |
| Yes                                                                                   | 622 (66.4)                   |
| No                                                                                    | 315 (33.6)                   |
| <b>Is there an ethical guidelines to regulate the conduction of clinical trials?</b>  |                              |
| Yes                                                                                   | 673 (71.8)                   |
| No                                                                                    | 265 (28.3)                   |
| <b>Are there a direct benefits for participants to conduct Clinical Trials?</b>       |                              |
| Definitely                                                                            | 313 (33.4)                   |
| Definitely not                                                                        | 35 (3.7)                     |
| No benefit or harm                                                                    | 19 (2.0)                     |
| Possible benefit or harm                                                              | 436 (46.5)                   |
| Not sure                                                                              | 135 (14.4)                   |
| <b>Are there a direct benefits for community to conduct Clinical Trials?</b>          |                              |
| Yes                                                                                   | 676 (72.1)                   |
| No                                                                                    | 262 (27.9)                   |
| <b>When can an investigator start clinical trials?</b>                                |                              |
| Any time they want                                                                    | 42 (4.5)                     |
| Only with participant agreement                                                       | 135 (14.4)                   |
| After obtaining manager approval                                                      | 41 (4.4)                     |
| They should obtain approvals from responsible authorities                             | 525 (56.0)                   |
| Not sure                                                                              | 195 (20.8)                   |
| <b>Can an investigator recruit patients without their approval?</b>                   |                              |
| Yes                                                                                   | 250 (26.7)                   |
| No                                                                                    | 687 (73.3)                   |
| <b>Can participants freely withdraw from clinical trials anytime?</b>                 |                              |
| Yes                                                                                   | 446 (47.6)                   |
| No                                                                                    | 492 (52.5)                   |
| <b>May published articles include confidential patient information (e.g., names)?</b> |                              |
| Yes                                                                                   | 318 (33.9)                   |
| No                                                                                    | 620 (66.1)                   |
| <b>Knowledge score out of 100 (12 questions)</b>                                      | <b>56.8 ± 24.8</b>           |

IRB: Institutional Review Board; SFDA: Saudi Food Drug Authority

**Table 3. Participants' attitude related responses**

| <b>Variables</b>                                                                              | <b>n (%)</b>       |
|-----------------------------------------------------------------------------------------------|--------------------|
| <b>Do you agree with testing new drugs in patients?</b>                                       |                    |
| Yes                                                                                           | 558 (59.5)         |
| No/not sure                                                                                   | 380 (40.5)         |
| <b>Do you agree with testing approved drugs in patients?</b>                                  |                    |
| Yes                                                                                           | 593 (63.2)         |
| No/not sure                                                                                   | 345 (36.8)         |
| <b>Do you agree with testing new drugs in healthy volunteers?</b>                             |                    |
| Yes                                                                                           | 286 (30.5)         |
| No/not sure                                                                                   | 651 (69.5)         |
| <b>Do you agree with testing new drugs in pediatric patients?</b>                             |                    |
| Yes                                                                                           | 452 (48.2)         |
| No/not sure                                                                                   | 485 (51.8)         |
| <b>Do you agree with testing approved drugs in pediatric patients?</b>                        |                    |
| Yes                                                                                           | 528 (56.4)         |
| No/not sure                                                                                   | 409 (43.7)         |
| <b>Do you agree with participating/having a family member participate in clinical trials?</b> |                    |
| Yes                                                                                           | 252 (26.9)         |
| Possibly                                                                                      | 395 (42.2)         |
| No/not sure                                                                                   | 290 (31.0)         |
| <b>What is your perception regarding clinical trials?</b>                                     |                    |
| Not important                                                                                 | 41 (4.4)           |
| Very important for drug development                                                           | 682 (72.7)         |
| Important only for pharmaceutical companies to earn money                                     | 54 (5.8)           |
| Not sure                                                                                      | 161 (17.2)         |
| <b>Are you willing to learn about clinical trials?</b>                                        |                    |
| Yes                                                                                           | 814 (86.8)         |
| No                                                                                            | 124 (13.2)         |
| <b>Do you trust research teams?</b>                                                           |                    |
| Yes                                                                                           | 629 (67.1)         |
| No/not sure                                                                                   | 309 (32.9)         |
| <b>Attitude score out of 100 (9 questions)</b>                                                | <b>61.5 ± 28.0</b> |

Table 4. Independent predictors of the Saudi public's knowledge and attitudes toward clinical trials

| Characteristics                                                     | Knowledge |             |        |        | Attitudes |             |       |        |
|---------------------------------------------------------------------|-----------|-------------|--------|--------|-----------|-------------|-------|--------|
|                                                                     | B         | 95% Wald CI |        | P      | B         | 95% Wald CI |       | P      |
| (Intercept)                                                         | 48.2      | 26.83       | 69.48  | 0.001* | 57.4      | 30.72       | 84.01 | 0.001* |
| Gender (reference: female)                                          |           |             |        |        |           |             |       |        |
| <i>Male</i>                                                         | -14.1     | -17.49      | -10.65 | 0.001* | -9.2      | -13.42      | -4.88 | 0.001* |
| Age (reference: 61+)                                                |           |             |        |        |           |             |       |        |
| <i>18-30</i>                                                        | 9.2       | -2.86       | 21.31  | 0.135  | -0.8      | -15.87      | 14.33 | 0.920  |
| <i>31-40</i>                                                        | 11.2      | -0.56       | 22.92  | 0.062  | 3.7       | -10.98      | 18.34 | 0.623  |
| <i>41-60</i>                                                        | 12.1      | 0.80        | 23.44  | 0.036* | 10.6      | -3.55       | 24.73 | 0.142  |
| Education (reference: University, college or more)                  |           |             |        |        |           |             |       |        |
| <i>Not educated</i>                                                 | -19.6     | -29.64      | -9.66  | 0.001* | -18.4     | -30.88      | -5.92 | 0.004* |
| <i>High school or less</i>                                          | -8.2      | -12.10      | -4.37  | 0.001* | -5.1      | -9.94       | -0.29 | 0.038* |
| Monthly income (reference: SR 15,000 or more)                       |           |             |        |        |           |             |       |        |
| <i>No income</i>                                                    | -9.7      | -17.17      | -2.19  | 0.011* | -1.0      | -10.38      | 8.34  | 0.831  |
| <i>SR 5,000 or less</i>                                             | -9.1      | -15.48      | -2.79  | 0.005* | 0.4       | -7.50       | 8.35  | 0.916  |
| <i>SR 6,000 to SR 10,000</i>                                        | -6.9      | -12.71      | -1.00  | 0.022* | 0.0       | -7.36       | 7.28  | 0.992  |
| <i>SR 11,000 to SR 15,000</i>                                       | -3.6      | -9.65       | 2.38   | 0.236  | 1.2       | -6.28       | 8.73  | 0.749  |
| Nationality (reference: non-Saudi)                                  |           |             |        |        |           |             |       |        |
| <i>Saudi</i>                                                        | -1.6      | -6.80       | 3.63   | 0.552  | 1.0       | -5.52       | 7.51  | 0.764  |
| Residency (reference: Eastern region)                               |           |             |        |        |           |             |       |        |
| <i>Central region</i>                                               | 3.6       | -4.94       | 12.05  | 0.412  | -0.5      | -11.14      | 10.08 | 0.922  |
| <i>Western region</i>                                               | 1.9       | -7.60       | 11.39  | 0.696  | -0.9      | -12.73      | 11.00 | 0.886  |
| <i>Northern region</i>                                              | -10.8     | -20.77      | -0.76  | 0.035* | -12.7     | -25.19      | -0.20 | 0.046* |
| <i>Southern region</i>                                              | -1.1      | -10.89      | 8.76   | 0.832  | -5.3      | -17.61      | 6.93  | 0.393  |
| Marital Status (reference: other)                                   |           |             |        |        |           |             |       |        |
| <i>Single</i>                                                       | 1.4       | -6.94       | 9.81   | 0.736  | -3.1      | -13.55      | 7.37  | 0.563  |
| <i>Married</i>                                                      | 0.9       | -6.80       | 8.67   | 0.813  | -4.5      | -14.17      | 5.15  | 0.360  |
| Employment (reference: housewife)                                   |           |             |        |        |           |             |       |        |
| <i>Student</i>                                                      | -5.1      | -14.08      | 3.97   | 0.272  | 2.1       | -9.21       | 13.34 | 0.719  |
| <i>Undergraduate student</i>                                        | 0.2       | -8.60       | 8.99   | 0.965  | 3.7       | -7.26       | 14.71 | 0.506  |
| <i>Government sector</i>                                            | -3.0      | -11.56      | 5.55   | 0.491  | 1.0       | -9.70       | 11.67 | 0.857  |
| <i>Private sector</i>                                               | -5.1      | -13.65      | 3.51   | 0.247  | -1.0      | -11.75      | 9.69  | 0.850  |
| <i>Military</i>                                                     | -10.3     | -20.56      | -0.03  | 0.049* | -0.9      | -13.75      | 11.89 | 0.887  |
| <i>Private work</i>                                                 | -6.4      | -15.54      | 2.72   | 0.169  | -2.8      | -14.18      | 8.64  | 0.634  |
| <i>Retired</i>                                                      | -0.3      | -11.73      | 11.19  | 0.963  | 8.5       | -5.86       | 22.76 | 0.247  |
| <i>Not working</i>                                                  | -5.2      | -14.01      | 3.53   | 0.241  | 3.5       | -7.45       | 14.45 | 0.531  |
| Health insurance (reference: no insurance)                          |           |             |        |        |           |             |       |        |
| <i>Governmental</i>                                                 | 12.9      | 4.48        | 21.33  | 0.003* | 10.1      | -0.45       | 20.60 | 0.061  |
| <i>Private</i>                                                      | 16.5      | 7.06        | 25.95  | 0.001* | 4.4       | -7.42       | 16.18 | 0.467  |
| <i>Other</i>                                                        | 12.8      | 4.49        | 21.08  | 0.003* | 7.9       | -2.50       | 18.22 | 0.137  |
| Chronic diseases (reference: yes)                                   |           |             |        |        |           |             |       |        |
| <i>No</i>                                                           | -2.2      | -5.75       | 1.27   | 0.211  | -3.5      | -7.91       | 0.87  | 0.116  |
| Medical background (reference: yes)                                 |           |             |        |        |           |             |       |        |
| <i>No</i>                                                           | -4.7      | -8.47       | -0.90  | 0.015* | -5.0      | -9.70       | -0.24 | 0.039* |
| Participated in medical research (reference: no)                    |           |             |        |        |           |             |       |        |
| <i>Yes</i>                                                          | 6.0       | -1.78       | 13.77  | 0.131  | 1.7       | -8.04       | 11.38 | 0.736  |
| Knows somebody who participated in medical research (reference: no) |           |             |        |        |           |             |       |        |
| <i>Yes</i>                                                          | 12.3      | 7.07        | 17.55  | 0.001* | 10.4      | 3.88        | 16.97 | 0.002* |

\*Significant at  $\alpha = 0.05$ . CI, confidence interval.

STROBE Statement—Checklist of items that should be included in reports of *cross-sectional studies*

|                              | Item No                                                                            | Recommendation                                                                                                                                                                                    | Page No |
|------------------------------|------------------------------------------------------------------------------------|---------------------------------------------------------------------------------------------------------------------------------------------------------------------------------------------------|---------|
| <b>Title and abstract</b>    | 1                                                                                  | (a) Indicate the study's design with a commonly used term in the title or the abstract                                                                                                            | 1, 4    |
|                              |                                                                                    | (b) Provide in the abstract an informative and balanced summary of what was done and what was found                                                                                               | 4       |
| <b>Introduction</b>          |                                                                                    |                                                                                                                                                                                                   |         |
| Background/rationale         | 2                                                                                  | Explain the scientific background and rationale for the investigation being reported                                                                                                              | 6       |
| Objectives                   | 3                                                                                  | State specific objectives, including any prespecified hypotheses                                                                                                                                  | 7       |
| <b>Methods</b>               |                                                                                    |                                                                                                                                                                                                   |         |
| Study design                 | 4                                                                                  | Present key elements of study design early in the paper                                                                                                                                           | 7       |
| Setting                      | 5                                                                                  | Describe the setting, locations, and relevant dates, including periods of recruitment, exposure, follow-up, and data collection                                                                   | 7       |
| Participants                 | 6                                                                                  | (a) Give the eligibility criteria, and the sources and methods of selection of participants                                                                                                       | 8       |
| Variables                    | 7                                                                                  | Clearly define all outcomes, exposures, predictors, potential confounders, and effect modifiers. Give diagnostic criteria, if applicable                                                          | 9       |
| Data sources/<br>measurement | 8*                                                                                 | For each variable of interest, give sources of data and details of methods of assessment (measurement). Describe comparability of assessment methods if there is more than one group              | 9       |
| Bias                         | 9                                                                                  | Describe any efforts to address potential sources of bias                                                                                                                                         | 8,9,10  |
| Study size                   | 10                                                                                 | Explain how the study size was arrived at                                                                                                                                                         | 8       |
| Quantitative variables       | 11                                                                                 | Explain how quantitative variables were handled in the analyses. If applicable, describe which groupings were chosen and why                                                                      | 9,10    |
| Statistical methods          | 12                                                                                 | (a) Describe all statistical methods, including those used to control for confounding                                                                                                             | 10      |
|                              |                                                                                    | (b) Describe any methods used to examine subgroups and interactions                                                                                                                               | 10      |
|                              | (c) Explain how missing data were addressed                                        |                                                                                                                                                                                                   |         |
|                              | (d) If applicable, describe analytical methods taking account of sampling strategy | 8                                                                                                                                                                                                 |         |
|                              | (e) Describe any sensitivity analyses                                              |                                                                                                                                                                                                   |         |
| <b>Results</b>               |                                                                                    |                                                                                                                                                                                                   |         |
| Participants                 | 13*                                                                                | (a) Report numbers of individuals at each stage of study—eg numbers potentially eligible, examined for eligibility, confirmed eligible, included in the study, completing follow-up, and analysed | 11      |
|                              |                                                                                    | (b) Give reasons for non-participation at each stage                                                                                                                                              | 11      |
|                              |                                                                                    | (c) Consider use of a flow diagram                                                                                                                                                                |         |
| Descriptive data             | 14*                                                                                | (a) Give characteristics of study participants (eg demographic, clinical, social) and information on exposures and potential confounders                                                          | 11, 22  |
|                              |                                                                                    | (b) Indicate number of participants with missing data for each variable of interest                                                                                                               |         |

|                          |     |                                                                                                                                                                                                              |                    |
|--------------------------|-----|--------------------------------------------------------------------------------------------------------------------------------------------------------------------------------------------------------------|--------------------|
| Outcome data             | 15* | Report numbers of outcome events or summary measures                                                                                                                                                         | 11,12,22-25        |
| Main results             | 16  | (a) Give unadjusted estimates and, if applicable, confounder-adjusted estimates and their precision (eg, 95% confidence interval). Make clear which confounders were adjusted for and why they were included | 10, 11, 12, 22, 25 |
|                          |     | (b) Report category boundaries when continuous variables were categorized                                                                                                                                    | 11, 22, 25         |
|                          |     | (c) If relevant, consider translating estimates of relative risk into absolute risk for a meaningful time period                                                                                             |                    |
| Other analyses           | 17  | Report other analyses done—eg analyses of subgroups and interactions, and sensitivity analyses                                                                                                               | 14                 |
| <b>Discussion</b>        |     |                                                                                                                                                                                                              |                    |
| Key results              | 18  | Summarise key results with reference to study objectives                                                                                                                                                     | 14                 |
| Limitations              | 19  | Discuss limitations of the study, taking into account sources of potential bias or imprecision. Discuss both direction and magnitude of any potential bias                                                   | 18                 |
| Interpretation           | 20  | Give a cautious overall interpretation of results considering objectives, limitations, multiplicity of analyses, results from similar studies, and other relevant evidence                                   | 14-18              |
| Generalisability         | 21  | Discuss the generalisability (external validity) of the study results                                                                                                                                        | 18                 |
| <b>Other information</b> |     |                                                                                                                                                                                                              |                    |
| Funding                  | 22  | Give the source of funding and the role of the funders for the present study and, if applicable, for the original study on which the present article is based                                                | 2                  |

\*Give information separately for exposed and unexposed groups.

**Note:** An Explanation and Elaboration article discusses each checklist item and gives methodological background and published examples of transparent reporting. The STROBE checklist is best used in conjunction with this article (freely available on the Web sites of PLoS Medicine at <http://www.plosmedicine.org/>, Annals of Internal Medicine at <http://www.annals.org/>, and Epidemiology at <http://www.epidem.com/>). Information on the STROBE Initiative is available at [www.strobe-statement.org](http://www.strobe-statement.org).

# BMJ Open

## Knowledge of and attitudes toward clinical trials in Saudi Arabia: a cross-sectional study

|                                 |                                                                                                                                                                                                                                                                                                                                                                                                                                                                                                                                                                                                                                                                                                                                                                                         |
|---------------------------------|-----------------------------------------------------------------------------------------------------------------------------------------------------------------------------------------------------------------------------------------------------------------------------------------------------------------------------------------------------------------------------------------------------------------------------------------------------------------------------------------------------------------------------------------------------------------------------------------------------------------------------------------------------------------------------------------------------------------------------------------------------------------------------------------|
| Journal:                        | <i>BMJ Open</i>                                                                                                                                                                                                                                                                                                                                                                                                                                                                                                                                                                                                                                                                                                                                                                         |
| Manuscript ID                   | bmjopen-2019-031305.R3                                                                                                                                                                                                                                                                                                                                                                                                                                                                                                                                                                                                                                                                                                                                                                  |
| Article Type:                   | Original research                                                                                                                                                                                                                                                                                                                                                                                                                                                                                                                                                                                                                                                                                                                                                                       |
| Date Submitted by the Author:   | 10-Sep-2019                                                                                                                                                                                                                                                                                                                                                                                                                                                                                                                                                                                                                                                                                                                                                                             |
| Complete List of Authors:       | Al Rawashdeh, Nedal ; King Abdullah International Medical Research Center, Research Office; King Hussein Cancer Center, The Office of Scientific Affairs and Research<br>Damsees, Rana ; King Abdullah International Medical Research Center, Research Office; King Hussein Cancer Center, The Office of Scientific Affairs and Research<br>Al-Jeraisy, Majed ; King Abdullah International Medical Research Center, Research Office; King Saud bin Abdulaziz University for Health Sciences Al Qasim, Eman ; King Abdullah International Medical Research Center, Research Office; King Saud bin Abdulaziz University for Health Sciences<br>Deeb, Ahmad; King Abdullah International Medical Research Center, Research Office; King Saud bin Abdulaziz University for Health Sciences |
| <b>Primary Subject Heading</b>: | Public health                                                                                                                                                                                                                                                                                                                                                                                                                                                                                                                                                                                                                                                                                                                                                                           |
| Secondary Subject Heading:      | Public health, Research methods                                                                                                                                                                                                                                                                                                                                                                                                                                                                                                                                                                                                                                                                                                                                                         |
| Keywords:                       | Knowledge, Attitudes, Clinical trials < THERAPEUTICS                                                                                                                                                                                                                                                                                                                                                                                                                                                                                                                                                                                                                                                                                                                                    |
|                                 |                                                                                                                                                                                                                                                                                                                                                                                                                                                                                                                                                                                                                                                                                                                                                                                         |

SCHOLARONE™  
Manuscripts

1  
2  
3 **Knowledge of and attitudes toward clinical trials in Saudi Arabia: a cross-**  
4  
5 **sectional study**  
6  
7

8  
9 **Nedal Al-Rawashdeh<sup>1,2</sup>, Rana Damsees<sup>1,2</sup>, Majed Al Jeraisy<sup>1</sup>, Eman Al Qasim<sup>1</sup>, Ahmad M.**  
10  
11 **Deeb<sup>1\*</sup>**  
12  
13

- 14  
15 1. Research Office, King Abdullah International Medical Research Center, Riyadh, Saudi Arabia;  
16  
17 King Saud bin Abdulaziz University for Health Sciences, Riyadh Saudi Arabia; Ministry of  
18  
19 National Guard Health Affairs, Riyadh, Saudi Arabia.  
20  
21  
22 2. The Office of Scientific Affairs and Research, King Hussein Cancer Center, Amman, Jordan.  
23  
24  
25  
26  
27

28 **\* Corresponding author**  
29

30 **Ahmad M. Deeb, RN, MSN, CCRC®**  
31  
32

33 PO Box 22490, Mail Code 1515  
34  
35

36 Riyadh 11426, Kingdom of Saudi Arabia  
37  
38

39 Tel: +966118011111 ext. 18950  
40  
41

42 Email: [rn\\_a\\_deeb@hotmail.com](mailto:rn_a_deeb@hotmail.com)  
43  
44  
45  
46

47 Word count: 3255  
48  
49  
50  
51  
52  
53  
54  
55  
56  
57  
58  
59  
60

## ABSTRACT

**Objectives:** Clinical trials (CTs) are considered an important method for developing new treatments and providing access to potentially effective drugs that are still under investigation. Measuring the public's knowledge of and attitudes toward CTs is important for assessing their readiness for and acceptance of human drug testing, which has previously not been assessed in the Kingdom of Saudi Arabia (KSA). The objective of this study is to explore the Saudi public's knowledge of and attitudes toward CTs as well as participation in trials to test new or approved drugs.

**Design:** Cross-sectional.

**Setting:** The 2016 Al Jenadriyah cultural/heritage festival in Riyadh, KSA.

**Participants:** Participating booths and exhibition halls, as well as festival visitors, were approached to participate in the study.

**Primary and secondary outcome measures:** Knowledge of and attitudes toward CTs.

**Results:** The final number of participants was 938. The responses were converted to a percentage mean score (out of 100) for each knowledge-related response and attitude. The total mean knowledge score was  $56.8 \pm 24.8$  and the attitude-related score was  $61.5 \pm 28.0$ . Although most of the participants supported testing approved or off-label and new drugs on adult and pediatric patients, only a third (30.5%) agreed that new drugs could be tested on healthy volunteers. The results indicated that gender, educational level, income, medical background, age, and health insurance were independently associated with the level of



1  
2 knowledge of CTs. In terms of attitudes toward CTs, the factors that were independently  
3  
4 associated were gender, educational level, and medical background.  
5  
6  
7

8 **Conclusions:** The Saudi public has a low level of knowledge and a moderately positive attitude  
9  
10 toward CTs. There is a moderate positive correlation between the two factors such that as  
11  
12 knowledge of CTs increases, the Saudi public will hold more positive attitudes toward CTs.  
13  
14  
15

### 16 17 18 **Strengths and limitations of the study** 19

- 20  
21 • The Saudi public's knowledge of and attitudes toward CTs are under-researched.
- 22  
23 • This is the first study to explore the Saudi public's knowledge and attitudes in terms of the  
24  
25 different phases of CTs in adult and pediatric populations.  
26  
27
- 28  
29 • The main limitation is possible selection bias due to convenience sampling.  
30  
31  
32  
33  
34  
35  
36  
37  
38  
39  
40  
41  
42  
43  
44  
45  
46  
47  
48  
49  
50  
51  
52  
53  
54  
55  
56  
57  
58  
59  
60

## INTRODUCTION

A clinical trial (CT) is a superior research tool for advancing medical knowledge and practice as the results are considered to provide the highest level of evidence for medical practice and decision-making.[1] Volunteer participation is at the core of a successful CT. The involvement of an adequate number of participants is crucial in achieving the study's objectives, namely testing the hypothesis and answering the research questions. Failure to recruit an adequate number of participants could result in wasted time, money, and effort.[2] It may also delay the acceptance of the trial results and the completion of the drug development process.

Knowledge of and attitudes toward CTs are considered major challenges in participant recruitment.[3-6] Several studies have reported that knowledge of CTs and attitudes toward participation are interrelated,[7-11] as increased knowledge promotes a positive attitude toward CT participation. Low recruitment rates for CTs may be improved by increasing the public's knowledge about CTs[6, 9, 11] and by highlighting how participation can contribute to the improvement of the public's health.[12, 13] Improving the public's knowledge of CTs represents an important initial step in improving CT recruitment in the future.[9, 12, 14]

Clinical research in the Kingdom of Saudi Arabia (KSA) has made advancements during the last few decades.[15] Saudi researchers have contributed to medical literature by conducting different types of research, including investigator-initiated CTs and international multicenter-sponsored CTs.[15] Measuring the Saudi public's knowledge of and attitudes toward CTs is crucial for assessing their acceptance of CTs and to provide an evidence base to

1  
2 improve CT recruitment and decision-making. In addition, such an endeavor can provide  
3  
4 reliable information that can aid researchers and healthcare leaders in strategic planning of  
5  
6 public engagement in CT awareness campaigns. From the public's perspective, these efforts  
7  
8 may be beneficial through increasing their knowledge and awareness of CTs, improving medical  
9  
10 knowledge through dissemination of CT results, and sharing of public preferences for future  
11  
12  
13  
14  
15 CTs.

16  
17  
18 Several studies have reported the knowledge and attitudes of patients or families  
19  
20 toward CTs in healthcare settings in the KSA;[16-20] however, studies measuring the knowledge  
21  
22 and attitudes of the general Saudi public are lacking. The purpose of this study was to assess  
23  
24 the Saudi public's general knowledge of and attitudes toward CTs and more specifically, their  
25  
26 attitudes toward participation in CTs for drug development.  
27  
28  
29  
30

31 The study addressed the following four questions: What does the Saudi public know  
32  
33 about CTs? What is the attitude of individuals in the KSA toward CTs and participation in CTs? Is  
34  
35 there a correlation between the level of public knowledge and the attitudes of Saudi individuals  
36  
37 toward CTs? What factors are associated with the levels of public knowledge and attitudes  
38  
39 toward CTs in the Saudi population?  
40  
41  
42  
43

## 44 **MATERIALS AND METHODS**

### 47 **Setting**

48  
49  
50  
51 This cross-sectional study was conducted between February 2 and 19, 2016 at the Al  
52  
53 Jenadriyah Cultural and Heritage Festival. The festival takes place in Riyadh and hosts millions  
54  
55 of residents and visitors from different regions in the country. We selected this event as it  
56  
57  
58  
59  
60

1  
2 provided us with a unique chance to interview a representative cross-section from all regions of  
3  
4  
5 the KSA. The study was approved by the Institutional Review Board of King Abdulaziz Medical  
6  
7 City, Riyadh, KSA.  
8  
9

## 10 **Study participants**

11  
12  
13  
14 The study included adults of both genders who were willing to participate. A  
15  
16 convenience sampling approach was used. Participating booths and exhibition halls in the  
17  
18 festival were approached and festival visitors were invited to participate in the study. All  
19  
20 participants provided informed consent by checking the YES box indicating their willingness to  
21  
22 complete the questionnaire. Respondents did not receive any compensation for participation in  
23  
24 the study.  
25  
26  
27  
28

## 29 **Patient and public involvement**

30  
31  
32 The public was not included in the development of the research questions or the design  
33  
34 of the study. However, the questionnaire was pre-tested with a different sample of the general  
35  
36 public before implementation.  
37  
38  
39  
40

## 41 **Sample size**

42  
43  
44 The population of the KSA is approximately 31,742,308 (Central Department of Statistics  
45  
46 and Information), including 11,677,338 expatriates (Non-Saudi).[21] On the basis of this  
47  
48 population estimate, a 0.05 margin of error, a 95% confidence level, and a response rate of  
49  
50 50%, the minimum sample size calculated for this study was 385. We targeted a sample size of  
51  
52  
53  
54  
55  
56  
57  
58  
59  
60

1  
2 1,000 to account for sampling errors and variability between the characteristics of our sample  
3  
4  
5 and the general Saudi population.  
6  
7  
8  
9

## 10 11 **Data collection** 12 13

14  
15 A structured questionnaire, developed in Arabic, was divided into three sections:  
16  
17 demographic information, knowledge, and attitudes.  
18  
19

20  
21 The following variables were included in the demographic information section: gender,  
22  
23 age, educational level, monthly income, nationality, residential area, employment status,  
24  
25 marital status, health insurance, chronic diseases, medical background (working in a healthcare  
26  
27 facility or having health-related education), and previous participation in medical research.  
28  
29

30  
31 The knowledge section was composed of 12 questions, and the participants' responses  
32  
33 were scored as correct (score = 1) or incorrect/not sure (score = 0). The total knowledge score  
34  
35 was converted to a percentage mean score with a possible maximum value of 100, where a  
36  
37 score of 100 indicates perfect knowledge of CTs.  
38  
39

40  
41 The attitude section was composed of nine direct questions, and participant answers  
42  
43 were scored as positive (score = 1) or negative/not sure (score = 0). The total attitude score was  
44  
45 converted to a percentage mean score with a possible maximum value of 100, where a score of  
46  
47  
48  
49  
50 100 indicates a positive attitude toward CTs.  
51  
52  
53  
54  
55  
56  
57  
58  
59  
60

1  
2 Based on previous studies, the overall knowledge and attitude levels were classified into  
3 three categories following Bloom's cut-off point criteria: above 80% (high level), 60–79%  
4 (moderate level), and less than 60% (low level).[22-24]  
5  
6  
7  
8  
9

10 We used simple language so as to enable the participants to answer the questions even  
11 if they were not aware of CTs. The questionnaire was validated using a content validation  
12 process. A panel of expert analysts evaluated the questions, rating each one as essential, useful,  
13 or irrelevant in the context of measuring knowledge and attitudes. The questionnaire was pre-  
14 tested using a sample of 28 participants. As a result of the pre-test, complex scientific terms  
15 were simplified. Reliability was tested by calculating the Cronbach's alpha for the pre-test  
16 sample for both the knowledge and attitude sections (21 items). The Cronbach's alpha was  
17 0.81.  
18  
19  
20  
21  
22  
23  
24  
25  
26  
27  
28  
29  
30

## 31 **Data analysis**

32  
33

34 The categorical variables were represented as frequency and percentage and the  
35 continuous variables as mean  $\pm$  standard deviation (SD). Normality was tested by the skewness  
36 coefficient, which indicated that the knowledge and attitude data were normally distributed.  
37 The Student's *t*-test and one-way analysis of variance were used as tests of significance. The  
38 Pearson's correlation coefficient was used to calculate the correlation between the knowledge  
39 and attitude scores. A generalized linear model was used to determine the factors  
40 independently associated with knowledge of and attitudes toward CTs. In this model, we  
41 controlled for gender, age, education, monthly income, nationality, residential area, marital  
42 status, employment, health insurance, chronic disease, medical background, previous medical  
43  
44  
45  
46  
47  
48  
49  
50  
51  
52  
53  
54  
55  
56  
57  
58  
59  
60

research participation, and medical research participation by someone close. All calculations were performed using SPSS version 23 (SPSS Inc., Chicago, IL, USA).

## RESULTS

### Participant characteristics

A total of 1,084 members of the public were approached to participate in the study. In total, 938 (86.5%) agreed to complete the questionnaire with one missing value in the gender and nationality variables. Of the 938 participants, most were males (61.6%). The age groups with the highest representation were 18–30 years (54.2%) and 31–40 years (27.6%). The majority of the participants (60.1%) reported achieving a tertiary educational level and 75.7% reported a monthly income of less than 10,000 Saudi Arabian riyal, which is equivalent to approximately 2,700 United States dollars. Approximately half of the participants were single (48.7%), and 22.2% indicated having been diagnosed with a chronic disease. Just more than a quarter (27.7%) of the sample had a medical background (working in a healthcare facility or having health-related education). A small group (15.9%) declared that they had previously participated in medical research, and 26.5% knew someone who had participated in medical research in the past (**Table 1**).

**Table 1. Participant characteristics and unadjusted factors associated with knowledge and attitudes**

| Characteristics | Group | Overall<br>N = 938 |     | Knowledge<br>Overall mean =<br>56.8 ± 24.8 |      |      | Attitudes<br>Overall mean =<br>61.5 ± 28.0 |      |      |
|-----------------|-------|--------------------|-----|--------------------------------------------|------|------|--------------------------------------------|------|------|
|                 |       | N                  | %   | Mean                                       | s.d. | P    | Mean                                       | s.d. | P    |
| Gender          | Male  | 57                 | 61. | 51.3                                       | 24.  | 0.00 | 57.4                                       | 28.  | 0.00 |

|                               |                                      |     |      |      |     |      |      |     |      |
|-------------------------------|--------------------------------------|-----|------|------|-----|------|------|-----|------|
|                               |                                      | 7   | 6    | 7    | 4   | 1*   | 0    | 0   | 1*   |
|                               | <i>Female</i>                        | 36  | 38.  | 65.6 | 22. |      | 67.9 | 26. |      |
|                               |                                      | 0   | 4    | 2    | 9   |      | 0    | 8   |      |
| Age                           | <i>18–30</i>                         | 50  | 54.  | 55.4 | 26. |      | 59.3 | 28. |      |
|                               |                                      | 8   | 2    | 5    | 0   |      | 6    | 2   |      |
|                               | <i>31–40</i>                         | 25  | 27.  | 60.0 | 23. |      | 63.2 | 27. |      |
|                               |                                      | 9   | 6    | 7    | 2   |      | 8    | 8   |      |
|                               | <i>41–60</i>                         | 15  | 16.  | 58.1 | 22. |      | 66.6 | 26. |      |
|                               |                                      | 3   | 3    | 7    | 0   |      | 7    | 0   |      |
|                               | <i>61+</i>                           | 18  | 1.9  | 37.5 | 22. | 0.00 | 50.6 | 34. | 0.00 |
|                               |                                      |     |      | 0    | 7   | 1*   | 2    | 1   | 7*   |
| Education                     | <i>Not educated</i>                  | 27  | 2.9  | 35.1 | 18. |      | 46.0 | 29. |      |
|                               |                                      |     |      | 9    | 0   |      | 9    | 8   |      |
|                               | <i>High school or lower</i>          | 34  | 37.  | 48.3 | 22. |      | 57.2 | 28. |      |
|                               |                                      | 7   | 0    | 7    | 7   |      | 5    | 0   |      |
|                               | <i>University, college or higher</i> | 56  | 60.  | 63.0 | 24. | 0.00 | 64.8 | 27. | 0.00 |
|                               |                                      | 3   | 1    | 6    | 2   | 1*   | 1    | 3   | 1*   |
| Monthly income                | ● <i>No income</i>                   | 19  | 20.  | 49.6 | 22. |      | 57.7 | 28. |      |
|                               |                                      | 5   | 8    | 2    | 7   |      | 8    | 5   |      |
|                               | ● <i>Less than 5,000 SAR</i>         | 28  | 29.  | 56.1 | 26. |      | 62.0 | 27. |      |
|                               |                                      | 0   | 9    | 3    | 1   |      | 2    | 2   |      |
|                               | ● <i>Less than 1,300 USD</i>         |     |      |      |     |      |      |     |      |
|                               | ● <i>5,001 to 10,000 SAR</i>         | 23  | 25.  | 56.7 | 23. |      | 60.6 | 28. |      |
|                               | 4                                    | 0   | 3    | 0    |     | 4    | 2    |     |      |
|                               | ● <i>1,301 to 2,700 USD</i>          |     |      |      |     |      |      |     |      |
| ● <i>10,001 to 15,000 SAR</i> | 14                                   | 15. | 61.4 | 24.  |     | 63.7 | 28.  |     |      |
|                               | 8                                    | 8   | 3    | 2    |     | 4    | 0    |     |      |
|                               | ● <i>2,701 to 4,000 USD</i>          |     |      |      |     |      |      |     |      |
| ● <i>More than 15,000 SAR</i> | 79                                   | 8.5 | 68.8 | 25.  |     | 67.3 | 27.  |     |      |
|                               |                                      |     | 8    | 3    |     | 0.00 | 7    | 9   | 0.08 |
|                               | ● <i>More than 4,000 USD</i>         |     |      |      |     | 1*   |      |     | 4    |
| Nationality                   | <i>Saudi</i>                         | 81  | 87.  | 57.2 | 24. |      | 62.1 | 27. |      |
|                               |                                      | 7   | 3    | 7    | 6   |      | 0    | 7   |      |
|                               | <i>Non-Saudi</i>                     | 11  | 12.  | 53.7 | 25. | 0.14 | 57.5 | 29. | 0.09 |
|                               |                                      | 9   | 7    | 1    | 8   | 3    | 2    | 4   | 5    |
| Residential area              | <i>Central region</i>                | 70  | 75.  | 59.2 | 24. |      | 62.9 | 28. |      |
|                               |                                      | 7   | 4    | 1    | 4   |      | 3    | 5   |      |
|                               | <i>Western region</i>                | 86  | 9.2  | 52.5 | 27. | 0.00 | 59.0 | 28. | 0.05 |
|                               |                                      |     |      | 2    | 6   |      | 4    | 3   |      |
|                               | <i>Northern region</i>               | 59  | 6.3  | 46.1 | 25. | 1*   | 53.4 | 25. | 5    |



|                    |                                                    |    |     |      |     |      |      |     |      |
|--------------------|----------------------------------------------------|----|-----|------|-----|------|------|-----|------|
|                    |                                                    |    |     | 9    | 0   |      | 8    | 1   |      |
|                    | <i>Southern region</i>                             | 60 | 6.4 | 49.3 | 20. |      | 57.0 | 22. |      |
|                    |                                                    |    |     | 1    | 7   |      | 4    | 5   |      |
|                    | <i>Eastern region</i>                              | 26 | 2.8 | 47.7 | 21. |      | 58.1 | 26. |      |
|                    |                                                    |    |     | 6    | 3   |      | 2    | 9   |      |
| Marital status     | <i>Single</i>                                      | 45 | 48. | 56.0 | 26. |      | 60.5 | 28. |      |
|                    |                                                    | 5  | 7   | 6    | 7   |      | 9    | 3   |      |
|                    | <i>Married</i>                                     | 44 | 47. | 57.0 | 22. |      | 61.6 | 27. |      |
|                    |                                                    | 4  | 5   | 4    | 8   |      | 1    | 5   |      |
|                    | <i>Other</i>                                       | 35 | 3.8 | 60.4 | 22. | 0.54 | 70.4 | 28. | 0.13 |
|                    |                                                    |    |     | 8    | 1   | 9    | 8    | 8   | 0    |
| Employment         | <i>Student in school</i>                           | 78 | 8.3 | 47.5 | 24. |      | 56.1 | 27. |      |
|                    |                                                    |    |     | 4    | 0   |      | 3    | 4   |      |
|                    | <i>Undergraduate student/university or college</i> | 16 | 17. | 63.1 | 26. |      | 65.6 | 25. |      |
|                    |                                                    | 6  | 8   | 5    | 0   |      | 6    | 6   |      |
|                    | <i>Government sector</i>                           | 23 | 25. | 61.7 | 24. |      | 64.6 | 28. |      |
|                    |                                                    | 5  | 0   | 0    | 1   |      | 8    | 1   |      |
|                    | <i>Private sector</i>                              | 20 | 22. | 56.2 | 25. |      | 59.5 | 28. |      |
|                    |                                                    | 8  | 2   | 9    | 4   |      | 6    | 0   |      |
|                    | <i>Military</i>                                    | 54 | 5.7 | 52.1 | 23. |      | 55.7 | 30. |      |
|                    |                                                    |    |     | 6    | 2   |      | 6    | 6   |      |
|                    | <i>Private work/owner</i>                          | 61 | 6.8 | 50.6 | 22. |      | 56.6 | 31. |      |
|                    |                                                    |    |     | 8    | 5   |      | 5    | 1   |      |
|                    | <i>Retired</i>                                     | 26 | 2.7 | 51.9 | 21. |      | 65.3 | 31. |      |
|                    |                                                    |    |     | 2    | 9   |      | 8    | 5   |      |
|                    | <i>Not working</i>                                 | 62 | 6.6 | 44.4 | 21. |      | 57.1 | 26. |      |
|                    |                                                    |    |     | 9    | 7   |      | 7    | 3   |      |
|                    | <i>Housewife</i>                                   | 47 | 4.9 | 59.2 | 18. | 0.00 | 64.3 | 26. | 0.02 |
|                    |                                                    |    |     | 2    | 9   | 1*   | 0    | 2   | 8*   |
| Health insurance   | <i>Governmental</i>                                | 56 | 59. | 58.2 | 25. |      | 64.0 | 27. |      |
|                    |                                                    | 0  | 7   | 3    | 2   |      | 9    | 4   |      |
|                    | <i>Private</i>                                     | 11 | 12. | 58.4 | 25. |      | 58.4 | 30. |      |
|                    |                                                    | 6  | 4   | 1    | 0   |      | 3    | 1   |      |
|                    | <i>Other</i>                                       | 22 | 24. | 55.2 | 22. |      | 58.4 | 27. |      |
|                    |                                                    | 6  | 1   | 0    | 5   |      | 6    | 4   |      |
|                    | <i>No insurance</i>                                | 36 | 3.8 | 40.0 | 24. | 0.00 | 49.3 | 28. | 0.00 |
|                    |                                                    |    |     | 5    | 9   | 1*   | 8    | 8   | 1*   |
| Chronic disease    | <i>Yes</i>                                         | 20 | 22. | 53.2 | 23. |      | 59.1 | 27. |      |
|                    |                                                    | 8  | 2   | 1    | 7   |      | 9    | 7   |      |
|                    | <i>No</i>                                          | 73 | 77. | 57.8 | 25. | 0.01 | 62.1 | 28. | 0.18 |
|                    |                                                    | 0  | 8   | 5    | 0   | 7*   | 2    | 0   | 3    |
| Medical background | <i>Yes</i>                                         | 25 | 27. | 65.9 | 26. | 0.00 | 67.3 | 27. | 0.00 |
|                    |                                                    | 9  | 7   | 9    | 6   | 1*   | 5    | 5   | 1*   |

|                                                                |                                              |         |          |           |          |            |           |          |            |
|----------------------------------------------------------------|----------------------------------------------|---------|----------|-----------|----------|------------|-----------|----------|------------|
|                                                                | <i>No</i>                                    | 67<br>7 | 72.<br>3 | 53.3<br>7 | 23.<br>1 |            | 59.2<br>3 | 27.<br>9 |            |
| Previous medical research participation                        | <i>Yes</i>                                   | 14<br>9 | 15.<br>9 | 65.8<br>3 | 25.<br>8 |            | 66.4<br>4 | 27.<br>6 |            |
|                                                                | <i>Was requested, but didn't participate</i> | 11      | 1.1      | 50.0<br>0 | 22.<br>4 |            | 63.6<br>4 | 27.<br>3 |            |
|                                                                | <i>No</i>                                    | 73<br>7 | 78.<br>6 | 55.5<br>4 | 24.<br>3 |            | 60.6<br>5 | 28.<br>1 |            |
|                                                                | <i>Not sure</i>                              | 41      | 4.4      | 48.9<br>8 | 22.<br>3 | 0.00<br>1* | 57.4<br>5 | 26.<br>0 | 0.00<br>1* |
| Do you know somebody who has participated in medical research? | <i>Yes</i>                                   | 24<br>8 | 26.<br>5 | 60.4<br>2 | 24.<br>6 |            | 62.2<br>3 | 27.<br>6 |            |
|                                                                | <i>No</i>                                    | 59<br>6 | 63.<br>6 | 57.3<br>0 | 24.<br>6 |            | 62.9<br>9 | 27.<br>8 |            |
|                                                                | <i>Not sure</i>                              | 93      | 9.9      | 44.1<br>8 | 23.<br>1 | 0.00<br>1* | 49.4<br>6 | 27.<br>7 | 0.10<br>0  |

\* Significant at  $\alpha = 0.05$ . SAR = Saudi Arabian riyal; USD = United States dollar

## Knowledge about clinical trials in the KSA

The overall percentage mean score  $\pm$  SD for knowledge regarding CTs was  $56.8 \pm 24.8$ . Although some participants were not aware of the term, almost half (43.7%) could define the concept correctly. Most of the participants (71.8%) agreed that CTs are subject to ethical guidelines, but only 26.8% were aware of the concept of an institutional review board (**Table 2**). The majority (81.1%) was aware of the Saudi Food and Drug Authority (SFDA), and 66.4% were aware of the SFDA role in the regulation of CTs. Most of the participants (72.1%) agreed that CTs benefit the community, and 46.5% responded correctly regarding the benefits of CTs for the study participants. Approximately half of the sample was aware of the conditions governing the initiation of CTs (56.0%) as well as the right of CT participants to withdraw from a study at

any time (47.6%). Other findings from the knowledge section of the questionnaire are listed in

**Table 2.**

**Table 2. Participants' knowledge-related responses**

| Variables                                                                | n (% of participants) |
|--------------------------------------------------------------------------|-----------------------|
| Have you heard about clinical trials?                                    |                       |
| Yes                                                                      | 289 (30.8)            |
| No/not sure                                                              | 648 (69.1)            |
| What is the definition of a clinical trial?                              |                       |
| Studies in clinics to survey patients' opinions about healthcare topics  | 139 (14.8)            |
| Experiments on animals                                                   | 119 (12.7)            |
| Studies to test new drugs or procedures on humans                        | 410 (43.7)            |
| Graduation projects for medical students                                 | 62 (6.6)              |
| Not sure                                                                 | 208 (22.2)            |
| Have you heard about an IRB?                                             |                       |
| Yes                                                                      | 251 (26.8)            |
| No                                                                       | 685 (73.1)            |
| Have you heard of the SFDA?                                              |                       |
| Yes                                                                      | 761 (81.1)            |
| No                                                                       | 177 (18.9)            |
| Does the SFDA play a role in regulating clinical trials?                 |                       |
| Yes                                                                      | 622 (66.4)            |
| No                                                                       | 315 (33.6)            |
| Are there ethical guidelines to regulate the conduct of clinical trials? |                       |
| Yes                                                                      | 673 (71.8)            |
| No                                                                       | 265 (28.3)            |
| Are there direct benefits for participants in clinical trials?           |                       |
| Definitely                                                               | 313 (33.4)            |
| Definitely not                                                           | 35 (3.7)              |
| No benefit or harm                                                       | 19 (2.0)              |
| Possible benefit or harm                                                 | 436 (46.5)            |
| Not sure                                                                 | 135 (14.4)            |
| Do clinical trials have direct benefits for the community?               |                       |
| Yes                                                                      | 676 (72.1)            |
| No                                                                       | 262 (27.9)            |
| When can an investigator start clinical trials?                          |                       |
| Any time they want                                                       | 42 (4.5)              |
| Only with participant agreement                                          | 135 (14.4)            |
| After obtaining manager approval                                         | 41 (4.4)              |

|                                                                                |                    |
|--------------------------------------------------------------------------------|--------------------|
| They should obtain approval from responsible authorities                       | 525 (56.0)         |
| Not sure                                                                       | 195 (20.8)         |
| Can an investigator recruit patients without their approval?                   |                    |
| Yes                                                                            | 250 (26.7)         |
| No                                                                             | 687 (73.3)         |
| Can participants freely withdraw from clinical trials anytime?                 |                    |
| Yes                                                                            | 446 (47.6)         |
| No                                                                             | 492 (52.5)         |
| May published articles include confidential patient information (e.g., names)? |                    |
| Yes                                                                            | 318 (33.9)         |
| No                                                                             | 620 (66.1)         |
| Knowledge score out of 100 (12 questions)                                      | <b>56.8 ± 24.8</b> |

IRB: Institutional Review Board; SFDA: Saudi Food and Drug Authority

## Attitudes toward CTs in the KSA

The overall percentage mean score  $\pm$  SD for Saudi attitudes toward CTs was  $61.5 \pm 28.0$  out of 100. Most of the participants (59.5%) had a positive attitude toward testing new drugs on adult patients in the KSA, and 63.2% were positive about testing approved/off-label drugs (approved and marketed drugs for other indications) on patients. However, only 30.5% of the participants were positive about conducting CTs using healthy volunteers (Phase I). The attitudes were similar for pediatric CTs, as 48.2% and 56.4% agreed with testing new drugs or approved/off-label drugs on pediatric patients, respectively. The majority of the participants (72.7%) agreed that CTs are important in terms of drug development, and 69.1% confirmed the possibility of participating in a CT should they or a close family member be presented with the opportunity. The majority of the participants (86.8%) indicated a willingness to learn more about CTs. Other findings from the attitude section of the questionnaire are listed in **Table 3**.

**Table 3. Participants' attitude-related responses**

| Variables                                                                              | n (%)              |
|----------------------------------------------------------------------------------------|--------------------|
| Do you agree with testing new drugs on patients?                                       |                    |
| Yes                                                                                    | 558 (59.5)         |
| No/not sure                                                                            | 380 (40.5)         |
| Do you agree with testing approved drugs on patients?                                  |                    |
| Yes                                                                                    | 593 (63.2)         |
| No/not sure                                                                            | 345 (36.8)         |
| Do you agree with testing new drugs on healthy volunteers?                             |                    |
| Yes                                                                                    | 286 (30.5)         |
| No/not sure                                                                            | 651(69.5)          |
| Do you agree with testing new drugs on pediatric patients?                             |                    |
| Yes                                                                                    | 452 (48.2)         |
| No/not sure                                                                            | 485 (51.8)         |
| Do you agree with testing approved drugs on pediatric patients?                        |                    |
| Yes                                                                                    | 528 (56.4)         |
| No/not sure                                                                            | 409 (43.7)         |
| Do you agree with participating/having a family member participate in clinical trials? |                    |
| Yes                                                                                    | 252 (26.9)         |
| Possibly                                                                               | 395 (42.2)         |
| No/not sure                                                                            | 290 (31.0)         |
| What is your perception regarding clinical trials?                                     |                    |
| Not important                                                                          | 41(4.4)            |
| Very important for drug development                                                    | 682 (72.7)         |
| Important only for pharmaceutical companies to earn money                              | 54 (5.8)           |
| Not sure                                                                               | 161(17.2)          |
| Are you willing to learn about clinical trials?                                        |                    |
| Yes                                                                                    | 814 (86.8)         |
| No                                                                                     | 124 (13.2)         |
| Do you trust research teams?                                                           |                    |
| Yes                                                                                    | 629 (67.1)         |
| No/not sure                                                                            | 309 (32.9)         |
| Attitude score out of 100 (9 questions)                                                |                    |
|                                                                                        | <b>61.5 ± 28.0</b> |

## Factors associated with increased knowledge and more positive attitudes toward CTs

The univariate analysis revealed that females had a higher level of knowledge about CTs than males. In addition, participants in the 31–40 age group had the highest level of knowledge

(Table 1). CT-related knowledge increased with an increased level of education ( $P = 0.001$ ) as well as an increased monthly income ( $P = 0.001$ ). Participants from the Central region of the KSA had a higher level knowledge compared to those from other regions ( $P = 0.001$ ) (Table 1). Undergraduate students and governmental employees had a higher level of knowledge compared to those from other employment categories ( $P = 0.001$ ) (Table 1). Having governmental or private health insurance ( $P = 0.001$ ) was associated with a higher level of CT-related knowledge. Noteworthy is that participants without chronic diseases had a higher level of knowledge than those with chronic diseases ( $P = 0.017$ ). Previous participation in medical research or knowing someone who had participated was associated with better CT-related knowledge ( $P = 0.001$ ) (Table 1).

After adjusting for possible confounders, the beta coefficients for participants who were male ( $B = -14.1$ ;  $P = 0.001$ ), uneducated ( $B = -19.6$ ;  $P = 0.001$ ), and unemployed ( $B = -9.7$ ;  $P = 0.011$ ) and who had no medical background ( $B = -4.7$ ;  $P = 0.015$ ) had significantly lower knowledge scores. By contrast, participants aged 41–60 years ( $B = 12.1$ ;  $P = 0.036$ ) and those with health insurance ( $B = 12.9$ ;  $P = 0.003$ ) were more knowledgeable regarding CTs (Table 4).

**Table 4. Independent factors associated with the Saudi public's knowledge of and attitudes toward clinical trials**

|                             | Knowledge |             |        |        | Attitudes |             |       |        |
|-----------------------------|-----------|-------------|--------|--------|-----------|-------------|-------|--------|
|                             | B         | 95% Wald CI |        | P      | B         | 95% Wald CI |       | P      |
| Lower                       |           | Upper       | Lower  |        |           | Upper       |       |        |
| Characteristics (Intercept) | 48.2      | 26.83       | 69.48  | 0.001* | 57.4      | 30.72       | 84.01 | 0.001* |
| Gender (reference: female)  |           |             |        |        |           |             |       |        |
| Male                        | -14.1     | -17.49      | -10.65 | 0.001* | -9.2      | -13.42      | -4.88 | 0.001* |

|                                                      |           |                |           |            |           |                |           |            |
|------------------------------------------------------|-----------|----------------|-----------|------------|-----------|----------------|-----------|------------|
| Age (reference: 61+)                                 |           |                |           |            |           |                |           |            |
| <i>18–30</i>                                         | 9.2       | –<br>2.86      | 21.3<br>1 | 0.13<br>5  | –0.8      | –<br>15.8<br>7 | 14.3<br>3 | 0.92<br>0  |
| <i>31–40</i>                                         | 11.2      | –<br>0.56      | 22.9<br>2 | 0.06<br>2  | 3.7       | –<br>10.9<br>8 | 18.3<br>4 | 0.62<br>3  |
| <i>41–60</i>                                         | 12.1      | 0.80           | 23.4<br>4 | 0.03<br>6* | 10.6      | –<br>3.55      | 24.7<br>3 | 0.14<br>2  |
| Education (reference: university, college or higher) |           |                |           |            |           |                |           |            |
| <i>Not educated</i>                                  | –<br>19.6 | –<br>29.6<br>4 | –<br>9.66 | 0.00<br>1* | –<br>18.4 | –<br>30.8<br>8 | –<br>5.92 | 0.00<br>4* |
| <i>High school or lower</i>                          | –8.2      | –<br>12.1<br>0 | –<br>4.37 | 0.00<br>1* | –5.1      | –<br>9.94      | –<br>0.29 | 0.03<br>8* |
| Monthly income (reference: 15,000 SAR or more)       |           |                |           |            |           |                |           |            |
| <i>No income</i>                                     | –9.7      | –<br>17.1<br>7 | –<br>2.19 | 0.01<br>1* | –1.0      | –<br>10.3<br>8 | 8.34      | 0.83<br>1  |
| <i>5,000 SAR or less</i>                             | –9.1      | –<br>15.4<br>8 | –<br>2.79 | 0.00<br>5* | 0.4       | –<br>7.50      | 8.35      | 0.91<br>6  |
| <i>6,000 to 10,000 SAR</i>                           | –6.9      | –<br>12.7<br>1 | –<br>1.00 | 0.02<br>2* | 0.0       | –<br>7.36      | 7.28      | 0.99<br>2  |
| <i>11,000 to 15,000 SAR</i>                          | –3.6      | –<br>9.65      | 2.38      | 0.23<br>6  | 1.2       | –<br>6.28      | 8.73      | 0.74<br>9  |
| Nationality (reference: non-Saudi)                   |           |                |           |            |           |                |           |            |
| <i>Saudi</i>                                         | –1.6      | –<br>6.80      | 3.63      | 0.55<br>2  | 1.0       | –<br>5.52      | 7.51      | 0.76<br>4  |
| Residential area (reference: Eastern region)         |           |                |           |            |           |                |           |            |
| <i>Central region</i>                                | 3.6       | –<br>4.94      | 12.0<br>5 | 0.41<br>2  | –0.5      | –<br>11.1<br>4 | 10.0<br>8 | 0.92<br>2  |
| <i>Western region</i>                                | 1.9       | –<br>7.60      | 11.3<br>9 | 0.69<br>6  | –0.9      | –<br>12.7<br>3 | 11.0<br>0 | 0.88<br>6  |
| <i>Northern region</i>                               | –<br>10.8 | –<br>20.7<br>7 | –<br>0.76 | 0.03<br>5* | –<br>12.7 | –<br>25.1<br>9 | –<br>0.20 | 0.04<br>6* |
| <i>Southern region</i>                               | –1.1      | –<br>10.8<br>9 | 8.76      | 0.83<br>2  | –5.3      | –<br>17.6<br>1 | 6.93      | 0.39<br>3  |

|                                            |           |                |           |            |      |                |           |            |
|--------------------------------------------|-----------|----------------|-----------|------------|------|----------------|-----------|------------|
| Marital status (reference: other)          |           |                |           |            |      |                |           |            |
| <i>Single</i>                              | 1.4       | –<br>6.94      | 9.81      | 0.73<br>6  | –3.1 | –<br>13.5<br>5 | 7.37      | 0.56<br>3  |
| <i>Married</i>                             | 0.9       | –<br>6.80      | 8.67      | 0.81<br>3  | –4.5 | –<br>14.1<br>7 | 5.15      | 0.36<br>0  |
| Employment (reference: housewife)          |           |                |           |            |      |                |           |            |
| <i>Student</i>                             | –5.1      | –<br>14.0<br>8 | 3.97      | 0.27<br>2  | 2.1  | –<br>9.21      | 13.3<br>4 | 0.71<br>9  |
| <i>Undergraduate student</i>               | 0.2       | –<br>8.60      | 8.99      | 0.96<br>5  | 3.7  | –<br>7.26      | 14.7<br>1 | 0.50<br>6  |
| <i>Government sector</i>                   | –3.0      | –<br>11.5<br>6 | 5.55      | 0.49<br>1  | 1.0  | –<br>9.70      | 11.6<br>7 | 0.85<br>7  |
| <i>Private sector</i>                      | –5.1      | –<br>13.6<br>5 | 3.51      | 0.24<br>7  | –1.0 | –<br>11.7<br>5 | 9.69      | 0.85<br>0  |
| <i>Military</i>                            | –<br>10.3 | –<br>20.5<br>6 | –<br>0.03 | 0.04<br>9* | –0.9 | –<br>13.7<br>5 | 11.8<br>9 | 0.88<br>7  |
| <i>Private work</i>                        | –6.4      | –<br>15.5<br>4 | 2.72      | 0.16<br>9  | –2.8 | –<br>14.1<br>8 | 8.64      | 0.63<br>4  |
| <i>Retired</i>                             | –0.3      | –<br>11.7<br>3 | 11.1<br>9 | 0.96<br>3  | 8.5  | –<br>5.86      | 22.7<br>6 | 0.24<br>7  |
| <i>Not working</i>                         | –5.2      | –<br>14.0<br>1 | 3.53      | 0.24<br>1  | 3.5  | –<br>7.45      | 14.4<br>5 | 0.53<br>1  |
| Health insurance (reference: no insurance) |           |                |           |            |      |                |           |            |
| <i>Governmental</i>                        | 12.9      | 4.48           | 21.3<br>3 | 0.00<br>3* | 10.1 | –<br>0.45      | 20.6<br>0 | 0.06<br>1  |
| <i>Private</i>                             | 16.5      | 7.06           | 25.9<br>5 | 0.00<br>1* | 4.4  | –<br>7.42      | 16.1<br>8 | 0.46<br>7  |
| <i>Other</i>                               | 12.8      | 4.49           | 21.0<br>8 | 0.00<br>3* | 7.9  | –<br>2.50      | 18.2<br>2 | 0.13<br>7  |
| Chronic diseases (reference: yes)          |           |                |           |            |      |                |           |            |
| <i>No</i>                                  | –2.2      | –<br>5.75      | 1.27      | 0.21<br>1  | –3.5 | –<br>7.91      | 0.87      | 0.11<br>6  |
| Medical background (reference: yes)        |           |                |           |            |      |                |           |            |
| <i>No</i>                                  | –4.7      | –<br>8.47      | –<br>0.90 | 0.01<br>5* | –5.0 | –<br>9.70      | –<br>0.24 | 0.03<br>9* |



|                                                                        |      |           |           |            |      |           |           |            |
|------------------------------------------------------------------------|------|-----------|-----------|------------|------|-----------|-----------|------------|
| Participated in medical research (reference: no)                       |      |           |           |            |      |           |           |            |
| Yes                                                                    | 6.0  | –<br>1.78 | 13.7<br>7 | 0.13<br>1  | 1.7  | –<br>8.04 | 11.3<br>8 | 0.73<br>6  |
| Knew somebody who had participated in medical research (reference: no) |      |           |           |            |      |           |           |            |
| Yes                                                                    | 12.3 | 7.07      | 17.5<br>5 | 0.00<br>1* | 10.4 | 3.88      | 16.9<br>7 | 0.00<br>2* |

\*Significant at  $\alpha = 0.05$ . CI, confidence interval, SAR = Saudi Arabian riyal.

In terms of attitudes, females were more positive toward CTs ( $P = 0.001$ ) than males. The 31–40 and 41–60 age groups were more positive compared to other age categories ( $P = 0.007$ ), and having a higher educational level was also associated with a more positive attitude ( $P = 0.001$ ) (**Table 1**). As with the knowledge section, undergraduate students and governmental employees were more positive toward CTs ( $P = 0.028$ ) than participants in other employment categories (**Table 1**), as were those with governmental or private health insurance ( $P = 0.001$ ). Participants with a medical background or who had previously participated in medical research tended to be more positive ( $P = 0.001$ ) compared to participants with no medical background or who had never participated in medical research (**Table 1**).

After adjusting for the possible confounders, participants who were male ( $B = -9.2$ ;  $P = 0.001$ ), uneducated ( $B = -18.4$ ,  $P = 0.004$ ), or did not have a medical background ( $B = -5.0$ ;  $P = 0.039$ ) were associated with more negative attitudes toward CTs (**Table 4**).

## Correlation between Saudi public's knowledge of and attitudes toward clinical trials

Our results indicated a moderately positive relationship between the Saudi public's knowledge of and attitudes toward CTs (Pearson's  $r = 0.564$ ,  $P = 0.0001$ ). Therefore, we predict

1  
2 that as the Saudi public's knowledge of CTs increases, they will become more positive toward  
3  
4  
5 CTs.  
6  
7  
8  
9

## 10 **DISCUSSION**

11  
12  
13 This public survey revealed a general lack of knowledge regarding CTs. Most of the  
14  
15 participants could not identify or correctly define the term "CT." Although most of the  
16  
17 participants were aware of the voluntary nature of participation in CTs, they were not aware of  
18  
19 their right to withdraw from CTs. The current results are supported by similar findings in studies  
20  
21 conducted in healthcare settings (with patients and/or their families) within the KSA.[17-20]  
22  
23  
24 The reason may be the lack of institutional and national campaigns promoting CTs.[5,25]  
25  
26  
27

28 Although most of the participants agreed that CTs are governed by ethical principles,  
29  
30 they were not aware of IRBs and their role in protecting human participants. In a study  
31  
32 conducted in a healthcare setting, Sheblaq et al. reported that the majority of the patients  
33  
34 diagnosed with cancer were not aware of the role of the IRB.[17] The public tends to expect the  
35  
36 authorities to protect them, even though they are not aware of exactly who plays this role. We  
37  
38 observed this phenomenon repeatedly when participants responded positively to questions  
39  
40 regarding their trust in the study team and in their compliance with regulatory guidelines when  
41  
42 initiating a trial or recruiting participants. The Saudi public recognized the SFDA and its role in  
43  
44 CTs, most likely owing to their well-known food and drug-related regulatory activities in the  
45  
46 KSA.  
47  
48  
49  
50  
51

52 The Saudi public's overall attitude toward participation in CTs was moderately positive.  
53  
54 The Saudi public agrees that CTs may be beneficial for both society as a whole and individual  
55  
56  
57  
58  
59  
60

1  
2 participants. In addition, trust in the study team may explain the favorable attitude toward  
3 participation in CTs. It could be argued that participant responses may change in real-life  
4 situations such as in healthcare settings. However, our results are consistent with other studies  
5 investigating the opinions of patients and families regarding participation in CTs in the KSA. [16-  
6  
7  
8  
9  
10  
11  
12 18]

13  
14 Similarly, but to a lesser degree, the Saudi public agreed with the idea of conducting  
15 pediatric CTs for approved/off-label drugs. However, only 48% of the participants indicated that  
16 it is acceptable to test new drugs on pediatric participants. Objection to the use of new drugs or  
17 vaccines was one of the factors underlying the opposition to pediatric CTs.[26] Although the  
18 study did not explore the reasons underpinning the objections to participating in CTs, we  
19 believe that the fear of adverse events, as well as safety concerns, may have been  
20 responsible.[25,27]

21  
22 Phase I CTs, which often involve testing new drugs on healthy volunteers, are important  
23 in the process of drug development. However, several ethical dilemmas influence conducting  
24 such studies with healthy volunteers and patients.[28] In our study, the Saudi public displayed  
25 negative attitudes toward testing new drugs on healthy volunteers. Only 30.5% of the  
26 participants agreed with the idea of conducting CTs on healthy volunteers in the KSA. This  
27 sentiment may be related to the lack of knowledge regarding the purpose of testing new drugs  
28 on healthy volunteers. Conducting public educational campaigns about CTs is necessary for  
29 improving the Saudi public's knowledge and awareness about CTs.

30  
31 Consistent with other studies[9,11], participants' attitudes toward CTs were markedly  
32 dependent on their knowledge of CTs. We predict that as their knowledge increases, the Saudi  
33  
34  
35  
36  
37  
38  
39  
40  
41  
42  
43  
44  
45  
46  
47  
48  
49  
50

1  
2 public will become more positive regarding CTs. A low level of knowledge regarding CTs may  
3  
4 indicate misunderstanding or confusion regarding the purposes of the different phases of CTs.  
5  
6 In turn, participants' answers may have been affected by insufficient knowledge. We believe  
7  
8 that many participants used their common sense to answer some survey questions and may  
9  
10 have begun to recognize the meaning of CTs while answering further questions. These  
11  
12 observations support the need for CT-related public educational campaigns, since the majority  
13  
14 of the participants were interested in learning more about CTs.  
15  
16  
17  
18

19 Male gender, lower education, lack of a medical background, lower monthly income, a  
20  
21 lower age group, and lack of health insurance were independently associated with a low level  
22  
23 of knowledge regarding CTs among the Saudi public. Male gender, less education, and the lack  
24  
25 of a medical background were independently associated with negative attitudes toward CTs.  
26  
27 Our results are consistent with an American household survey conducted to assess the level of  
28  
29 public participation in and awareness of clinical and translational research, where higher levels  
30  
31 of income and education were associated with higher participation and awareness.[29] In a  
32  
33 study conducted with patients diagnosed with cancer in a healthcare setting, lower educational  
34  
35 and income levels, as well as race and ethnicity, were associated with decreased awareness of  
36  
37 CTs.[9] Similarly, lower income and education were associated with a reduced willingness to  
38  
39 participate in CTs in African American patients diagnosed with cancer.[30] A study of patients  
40  
41 with cancer in the KSA found that higher education was the only significant predictor of trial  
42  
43 participation.[17]  
44  
45  
46  
47  
48  
49  
50

51 Unlike other studies with the public or in healthcare settings,[5,9,25,31-33] gender was  
52  
53 independently associated with knowledge and attitudes. Males were associated with a lower  
54  
55  
56  
57  
58  
59  
60

1  
2 level of knowledge and with a more negative attitude toward CTs. The underlying rationale has  
3  
4 not been clearly discussed in the literature. Gender differences regarding knowledge of and  
5  
6 attitudes toward CTs should be considered in future studies.  
7  
8  
9

10 In the previous studies investigating knowledge of and attitudes toward CTs in the KSA,  
11  
12 sample sizes were much smaller than ours and mainly involved patients and/or their families in  
13  
14 healthcare settings.[17,18] To our knowledge, this is the first Saudi study exploring the public's  
15  
16 knowledge of and attitudes toward CTs outside of a healthcare setting. Furthermore, it is the  
17  
18 first study to solicit public perspectives regarding the different phases of CTs conducted in adult  
19  
20 and pediatric populations.  
21  
22  
23

## 24 **CONCLUSION**

25  
26  
27  
28 The Saudi public has a low level of knowledge and moderately positive attitudes toward  
29  
30 CTs. Increasing the Saudi public's knowledge may contribute to positive attitudes toward  
31  
32 participation in and support of CTs; this supports our proposition of educational campaigns to  
33  
34 increase awareness and knowledge of CTs. These campaigns should target the less  
35  
36 knowledgeable sub-groups identified in this study and focus on the importance of evaluating  
37  
38 new drugs on healthy volunteers (Phase I clinical trials). In addition, our results support  
39  
40 conducting and investing in CTs in the KSA. Conducting similar studies in the future, taking the  
41  
42 limitations of this study into consideration, may facilitate measuring the improvement of  
43  
44 knowledge over time. We also recommend in-depth qualitative and focus group-based studies  
45  
46 for a deeper understanding of participant perspectives.  
47  
48  
49  
50  
51

## 52 **Study limitations**

53  
54  
55  
56  
57  
58  
59  
60

1  
2  
3 The main limitation in this study is related to possible selection bias due to the use of  
4  
5 convenience sampling; however the effect of this limitation may have been minimized by the  
6  
7 large sample size and the diversity of the visitors. For example, in our sample, the distribution  
8  
9 of males (61.6%) was slightly higher than in the general population, while in the 31–40 age  
10  
11 group, it was 27.6%, which is slightly lower than in the general population.  
12  
13  
14  
15  
16

## 17 **Declarations**

### 21 **Ethics approval and consent to participate**

22  
23  
24  
25 This study was approved by the Institutional Review Board at King Abdulaziz Medical City,  
26  
27  
28 Riyadh, KSA.  
29  
30

### 31 **Consent for publication**

32  
33  
34  
35 Not applicable.  
36  
37

### 38 **Availability of data and material**

39  
40  
41  
42 The datasets used and/or analyzed during the current study are available from the  
43  
44  
45 corresponding author on reasonable request.  
46  
47

### 48 **Competing interests**

49  
50  
51 The authors declare no competing interests.  
52  
53

### 54 **Funding**

1  
2 This study was supported by research grant RC16/010/R from the King Abdullah International  
3  
4  
5 Medical Research Center. The study sponsor did not have any role in the study design;  
6  
7 management, analysis, and interpretation of the data; or in writing the manuscript.  
8  
9

### 10 **Author contributions statement**

11  
12  
13  
14 Ahmad Deeb and Nedal Al Rawashdeh: Conception and design, data acquisition, data collection,  
15  
16 analytical plan, and drafting of the manuscript. Rana Damsees: Conception and design and data  
17  
18 acquisition. Majed Al Jeraisy: Conception and design, data acquisition, and supervision. Eman Al  
19  
20 Qasim: Conception and design and data collection. All authors have critically revised the  
21  
22 manuscript for important intellectual content, approve of the final version to be published, and  
23  
24 agree to be accountable for all aspects of the work.  
25  
26  
27  
28  
29

### 30 **Acknowledgments**

31  
32  
33 Not applicable.  
34  
35  
36  
37  
38  
39  
40  
41  
42  
43  
44  
45  
46  
47  
48  
49  
50  
51  
52  
53  
54  
55  
56  
57  
58  
59  
60

## REFERENCES

1. Oxford Centre for Evidence-based Medicine – Levels of Evidence. 2009. Accessed 10/09/2019, at [http://www.cebm.net/oxford-centre-evidence-based-medicine-levels-evidence-march-2009/.](http://www.cebm.net/oxford-centre-evidence-based-medicine-levels-evidence-march-2009/))
2. Wyse RK. Accelerating patient recruitment in clinical trials: in-depth report from the SMi 2nd annual conference In: Ross C, ed. The SMi 2nd Annual Conference. London: NetworkPharma Ltd 2006: 07-19.
3. Verheggen FW, Nieman FH, Reerink E, et al. Patient satisfaction with clinical trial participation. *Int J Qual Health Care* 1998;10:319–30.
4. Public Engagement and Clinical Trials: New Models and Disruptive Technologies: Workshop Summary. Washington, DC 2012.
5. Leiter A, Diefenbach MA, Doucette J, et al. Clinical trial awareness: changes over time and sociodemographic disparities. *Clin Trials* 2015;12:215–23.
6. The Need for Awareness of Clinical Research. National Institute of Health. 2016. Accessed 10/09/2019, at <https://www.nih.gov/health-information/nih-clinical-research-trials-you/need-awareness-clinical-research.>)
7. Kim SH, Tanner A, Friedman DB, et al. Barriers to clinical trial participation: comparing perceptions and knowledge of African American and white South Carolinians. *J Health Commun* 2015;20:816–26.
8. Kim SH, Tanner A, Friedman DB, et al. Barriers to clinical trial participation: a comparison of rural and urban communities in South Carolina. *J Community Health* 2014;39:562–71.



- 1  
2  
3 9. Lara PN, Jr., Paterniti DA, Chiechi C, et al. Evaluation of factors affecting awareness of  
4  
5 and willingness to participate in cancer clinical trials. *J Clin Oncol* 2005;23:9282–9.  
6
- 7  
8 10. Joshi V, Kulkarni AA. Public awareness of clinical trials: a qualitative pilot study in Pune.  
9  
10 *Perspect Clin Res* 2012;3:125–32.  
11
- 12  
13 11. Miller S, Hudson S, Egleston B, et al. The relationships among knowledge, self-efficacy,  
14  
15 preparedness, decisional conflict and decisions to participate in a cancer clinical trial.  
16  
17 *Psychooncology* 2013;22:481–9.  
18
- 19  
20 12. Denicoff AM, McCaskill-Stevens W, Grubbs SS, et al. The National Cancer Institute-  
21  
22 American Society of Clinical Oncology Cancer Trial Accrual Symposium: summary and  
23  
24 recommendations. *J Oncol Pract* 2013;9:267–76.  
25
- 26  
27 13. Trantham LC, Carpenter WR, DiMartino LD, et al. Perceptions of cancer clinical research  
28  
29 among African American men in North Carolina. *J Natl Med Assoc* 2015;107:33–41.  
30
- 31  
32 14. Featherstone K, Donovan JL. “Why don't they just tell me straight, why allocate it?” The  
33  
34 struggle to make sense of participating in a randomised controlled trial. *Soc Sci Med*  
35  
36 2002;55:709–19.  
37
- 38  
39 15. Jamjoom AB, Jamjoom AM, Samman AM, et al. Fate of registered clinical trials  
40  
41 performed in Saudi Arabia. *Saudi Med J* 2015;36:1245–8.  
42
- 43  
44 16. Bazarbashi S, Hassan A, Eldin AM, et al. Awareness and perceptions of clinical trials in  
45  
46 cancer patients and their families in Saudi Arabia. *J Cancer Educ* 2015;30:655–9.  
47
- 48  
49 17. Sheblaq NR, Traifi S, Sakiani MA, et al. Awareness and attitude of cancer patients about  
50  
51 participation in clinical research (CR) in Saudi Arabia [abstract]. *J Clin Oncol* 2013;(suppl;  
52  
53 e17528).  
54  
55  
56  
57  
58  
59  
60

- 1  
2  
3 18. Al-Tannir MA, El-Bakri N, Abu-Shaheen AK. Knowledge, attitudes and perceptions of  
4  
5 Saudis towards participating in clinical trials. *PLoS One* 2016;11:e0143893.  
6
- 7  
8 19. Al-Dakhil LO, Alanazy R, Al-Hamed RE, et al. Attitudes of patients in developing countries  
9  
10 toward participating in clinical trials: a survey of Saudi patients attending primary health care  
11  
12 services. *Oman Med J* 2016;31:284–9.  
13
- 14  
15 20. Almutairi KM, Alonazi WB, Alodhayani AA, et al. Barriers to cancer clinical trial  
16  
17 participation among Saudi nationals: a cross-sectional study. *J Relig Health* 2017;56:623–34.  
18
- 19  
20 21. The Central Department of Statistics and Information. 2016. (Accessed 24/04/2017,  
21  
22 2017, at [https://www.stats.gov.sa/sites/default/files/en-demographic-research-2016\\_4.pdf](https://www.stats.gov.sa/sites/default/files/en-demographic-research-2016_4.pdf).)  
23
- 24  
25 22. Abdullahi A, Hassan A, Kadarman N, et al. Food safety knowledge, attitude, and practice  
26  
27 toward compliance with abattoir laws among the abattoir workers in Malaysia. *International*  
28  
29 *Journal of General Medicine* 2016;9:79–87.  
30
- 31  
32 23. Nur Ain M, Azfar M, Omarulharis S, et al. Knowledge, attitude and practice of dengue  
33  
34 prevention among sub urban community in Sepang, Selangor. *International Journal of Public*  
35  
36 *Health and Clinical Sciences* 2017;4:73–83.  
37
- 38  
39 24. Malhotra V, Kaura S, Sharma H. Knowledge, attitude and practices about hepatitis B and  
40  
41 infection control measures among dental students in Patiala. *Journal of Dental and Allied*  
42  
43 *Sciences* 2017;6:65–9.  
44
- 45  
46 25. Choi YJ, Beck SH, Kang WY, et al. Knowledge and perception about clinical research  
47  
48 shapes behavior: face to face survey in Korean general public. *J Korean Med Sci* 2016;31:674–  
49  
50 81.  
51  
52  
53  
54  
55  
56  
57  
58  
59  
60

- 1  
2  
3 26. Nasef N, Shabaan A, Mohammed S, et al. Factors influencing parental consent for  
4 participation in clinical research involving their children in Egypt. *East Mediterr Health J*  
5 2014;20:162–8.  
6  
7  
8  
9  
10 27. Nabulsi M, Khalil Y, Makhoul J. Parental attitudes towards and perceptions of their  
11 children's participation in clinical research: a developing-country perspective. *J Med Ethics*  
12 2011;37:420–3.  
13  
14  
15  
16  
17 28. Elliott C, Abadie R. Exploiting a research underclass in phase 1 clinical trials. *N Engl J Med*  
18 2008;358:2316–7.  
19  
20  
21  
22 29. Davis MM, Clark SJ, Butchart AT, et al. Public participation in, and awareness about,  
23 medical research opportunities in the era of clinical and translational research. *Clin Transl Sci*  
24 2013;6:88–93.  
25  
26  
27  
28  
29 30. Advani AS, Atkeson B, Brown CL, et al. Barriers to the participation of African-American  
30 patients with cancer in clinical trials: a pilot study. *Cancer* 2003;97:1499–506.  
31  
32  
33  
34 31. Comis RL, Miller JD, Aldige CR, et al. Public attitudes toward participation in cancer  
35 clinical trials. *J Clin Oncol* 2003;21:830–5.  
36  
37  
38  
39 32. Joshi VD, Oka GA, Kulkarni AA, et al. Public awareness and perception of clinical trials:  
40 quantitative study in Pune. *Perspect Clin Res* 2013;4:169–74.  
41  
42  
43  
44 33. Ohmann C, Deimling A. Attitude towards clinical trials: results of a survey of persons  
45 interested in research. *Inflamm Res* 2004;53(Suppl 2):S142–7.  
46  
47  
48  
49  
50  
51  
52  
53  
54  
55  
56  
57  
58  
59  
60

STROBE Statement—Checklist of items that should be included in reports of *cross-sectional studies*

|                              | Item No | Recommendation                                                                                                                                                                                               | Page No            |
|------------------------------|---------|--------------------------------------------------------------------------------------------------------------------------------------------------------------------------------------------------------------|--------------------|
| <b>Title and abstract</b>    | 1       | (a) Indicate the study's design with a commonly used term in the title or the abstract                                                                                                                       | 1, 2               |
|                              |         | (b) Provide in the abstract an informative and balanced summary of what was done and what was found                                                                                                          | 2                  |
| <b>Introduction</b>          |         |                                                                                                                                                                                                              |                    |
| Background/rationale         | 2       | Explain the scientific background and rationale for the investigation being reported                                                                                                                         | 4                  |
| Objectives                   | 3       | State specific objectives, including any prespecified hypotheses                                                                                                                                             | 5                  |
| <b>Methods</b>               |         |                                                                                                                                                                                                              |                    |
| Study design                 | 4       | Present key elements of study design early in the paper                                                                                                                                                      | 5                  |
| Setting                      | 5       | Describe the setting, locations, and relevant dates, including periods of recruitment, exposure, follow-up, and data collection                                                                              | 5                  |
| Participants                 | 6       | (a) Give the eligibility criteria, and the sources and methods of selection of participants                                                                                                                  | 6                  |
| Variables                    | 7       | Clearly define all outcomes, exposures, predictors, potential confounders, and effect modifiers. Give diagnostic criteria, if applicable                                                                     | 7                  |
| Data sources/<br>measurement | 8*      | For each variable of interest, give sources of data and details of methods of assessment (measurement). Describe comparability of assessment methods if there is more than one group                         | 6, 7               |
| Bias                         | 9       | Describe any efforts to address potential sources of bias                                                                                                                                                    | 6,7,8              |
| Study size                   | 10      | Explain how the study size was arrived at                                                                                                                                                                    | 6                  |
| Quantitative variables       | 11      | Explain how quantitative variables were handled in the analyses. If applicable, describe which groupings were chosen and why                                                                                 | 8                  |
| Statistical methods          | 12      | (a) Describe all statistical methods, including those used to control for confounding                                                                                                                        | 8                  |
|                              |         | (b) Describe any methods used to examine subgroups and interactions                                                                                                                                          | 8                  |
|                              |         | (c) Explain how missing data were addressed                                                                                                                                                                  |                    |
|                              |         | (d) If applicable, describe analytical methods taking account of sampling strategy                                                                                                                           | 8                  |
|                              |         | (e) Describe any sensitivity analyses                                                                                                                                                                        |                    |
| <b>Results</b>               |         |                                                                                                                                                                                                              |                    |
| Participants                 | 13*     | (a) Report numbers of individuals at each stage of study—eg numbers potentially eligible, examined for eligibility, confirmed eligible, included in the study, completing follow-up, and analysed            | 9                  |
|                              |         | (b) Give reasons for non-participation at each stage                                                                                                                                                         | 9                  |
|                              |         | (c) Consider use of a flow diagram                                                                                                                                                                           |                    |
| Descriptive data             | 14*     | (a) Give characteristics of study participants (eg demographic, clinical, social) and information on exposures and potential confounders                                                                     | 9, 10              |
|                              |         | (b) Indicate number of participants with missing data for each variable of interest                                                                                                                          | 9                  |
| Outcome data                 | 15*     | Report numbers of outcome events or summary measures                                                                                                                                                         | 9,12,22-25         |
| Main results                 | 16      | (a) Give unadjusted estimates and, if applicable, confounder-adjusted estimates and their precision (eg, 95% confidence interval). Make clear which confounders were adjusted for and why they were included | 10, 12, 14, 15, 16 |

|                          |    |                                                                                                                                                                            |            |
|--------------------------|----|----------------------------------------------------------------------------------------------------------------------------------------------------------------------------|------------|
|                          |    | (b) Report category boundaries when continuous variables were categorized                                                                                                  |            |
|                          |    | (c) If relevant, consider translating estimates of relative risk into absolute risk for a meaningful time period                                                           |            |
| Other analyses           | 17 | Report other analyses done—eg analyses of subgroups and interactions, and sensitivity analyses                                                                             | 19         |
| <b>Discussion</b>        |    |                                                                                                                                                                            |            |
| Key results              | 18 | Summarise key results with reference to study objectives                                                                                                                   | 20         |
| Limitations              | 19 | Discuss limitations of the study, taking into account sources of potential bias or imprecision. Discuss both direction and magnitude of any potential bias                 | 23, 24     |
| Interpretation           | 20 | Give a cautious overall interpretation of results considering objectives, limitations, multiplicity of analyses, results from similar studies, and other relevant evidence | 20         |
| Generalisability         | 21 | Discuss the generalisability (external validity) of the study results                                                                                                      | 20, 23, 24 |
| <b>Other information</b> |    |                                                                                                                                                                            |            |
| Funding                  | 22 | Give the source of funding and the role of the funders for the present study and, if applicable, for the original study on which the present article is based              | 24         |

\*Give information separately for exposed and unexposed groups.

**Note:** An Explanation and Elaboration article discusses each checklist item and gives methodological background and published examples of transparent reporting. The STROBE checklist is best used in conjunction with this article (freely available on the Web sites of PLoS Medicine at <http://www.plosmedicine.org/>, Annals of Internal Medicine at <http://www.annals.org/>, and Epidemiology at <http://www.epidem.com/>). Information on the STROBE Initiative is available at [www.strobe-statement.org](http://www.strobe-statement.org).
